# Supplementary material for: HCV universal EHR prompt successfully increases screening, highlights potential disparities
Source: PLoS One. 2023 Mar 2;18(3):e0279972. doi: 10.1371/journal.pone.0279972 (PMC9980726; doi:10.1371/journal.pone.0279972)
Supplement: S1 Data — (XLSX) [file pone.0279972.s001.xlsx]

## Sheet: Cohort
Non-BC	BC	YOB	ATB_Lab_Text	Age	Sex	Race	STATE	Insurance_Group	ATB_Lab_Result_Cat	ATB_Encounter_Class_Combined	ATB_Encounter_Type_Combined	RNA	RNA_Lab_Result_Cat	RNA_Lab_Text	RNA_Encounter_Type_Combined
1	0	1971	Sep-2021	52	F	African American	MD	PRIVATE	Non-Reactive	Outpatient	Clinic
0	1	1961	Sep-2021	62	F	White	MD	PRIVATE	Non-Reactive	Outpatient	Clinic
1	0	2001	Sep-2021	22	F	White	MD	PRIVATE	Non-Reactive	Outpatient	Clinic
1	0	1979	Sep-2021	44	F	African American	MD	MEDICAID	Non-Reactive	Outpatient	Clinic
					M	White	MD	PRIVATE				1	Negative	Jul-2020	Clinic
1	0	1970	Sep-2021	53	F	African American	MD	PRIVATE	Non-Reactive	Outpatient	Clinic
1	0	1965	Sep-2021	58	F	Unknown	MD	MEDICAID	Non-Reactive	Outpatient	Clinic
1	0	1974	Sep-2021	49	F	White	MD	MEDICAID	Non-Reactive	Outpatient	Clinic
0	1	1964	Sep-2021	59	F	Asian	MD	PRIVATE	Non-Reactive	Outpatient	Clinic
1	0	1945	Sep-2021	78	F	White	MD	MEDICARE	Non-Reactive	Outpatient	Clinic
					F	White	MD	PRIVATE				1	Positive	Jul-2020	Clinic
					F	African American	MD	PRIVATE	Non-Reactive		Outpatient Message
					F	White	MD	MEDICARE				1	Negative	Jul-2020	Clinic
0	1	1950	Sep-2021	73	M	African American	MD		Non-Reactive	Outpatient	Clinic	1	Negative	Sep-2021	Clinic
0	1	1954	Sep-2021	69	M	White	MD	PRIVATE	Non-Reactive	Outpatient	Clinic
0	1	1958	Sep-2021	65	F	White	MD	PRIVATE	Non-Reactive	Outpatient	Clinic
0	1	1949	Sep-2021	74	M	African American	MD	MEDICARE	Non-Reactive	Outpatient	Clinic
1	0	1943	Sep-2021	80	F	African American	MD	MEDICARE	Non-Reactive	Outpatient	Clinic
1	0	1966	Sep-2021	57	M	African American	MD	PRIVATE	Non-Reactive	Outpatient	Clinic
1	0	1969	Sep-2021	54	M	White	MD	PRIVATE	Non-Reactive	Outpatient	Clinic
					F	African American	MD	MEDICAID				1	Negative	Jul-2020	Clinic
1	0	1981	Sep-2021	42	M	Unknown	DC	PRIVATE	Non-Reactive	Outpatient	Clinic
1	0	1979	Sep-2021	44	F	African American	MD	MEDICAID	Non-Reactive	Outpatient	Clinic
1	0	1967	Sep-2021	56	F	African American	MD	MEDICARE	Non-Reactive	Outpatient	Clinic
1	0	1994	Sep-2021	29	F	African American	MD	MEDICAID	Non-Reactive	Outpatient	Clinic
1	0	1970	Sep-2021	53	M	African American	MD	PRIVATE	Non-Reactive	Outpatient	Clinic
0	1	1948	Sep-2021	75	M	White	MD	PRIVATE	Non-Reactive	Outpatient	Clinic
1	0	1980	Sep-2021	43	M	White	MD	PRIVATE	Non-Reactive	Outpatient	Clinic
1	0	1975	Sep-2021	48	F	African American	DC	MEDICAID	Non-Reactive	Outpatient	Clinic
1	0	1974	Sep-2021	49	F	African American	MD	PRIVATE	Non-Reactive	Outpatient	Clinic
1	0	1974	Sep-2021	49	F	African American	MD	PRIVATE	Non-Reactive	Outpatient	Clinic
0	1	1957	Sep-2021	66	M	White	MD	PRIVATE	Non-Reactive	Outpatient	Clinic
0	1	1962	Sep-2021	61	F	African American	DC		Non-Reactive	Outpatient	Clinic
1	0	1965	Sep-2021	58	F	African American	DC	MEDICARE	Non-Reactive	Outpatient	Clinic
1	0	1977	Sep-2021	46	F	African American	MD	MEDICAID	Non-Reactive	Outpatient	Clinic
1	0	1972	Sep-2021	51	M	African American	DC		Non-Reactive	Outpatient	Clinic
0	1	1959	Sep-2021	64	F	African American	DC	MEDICAID	Non-Reactive	Outpatient	Clinic
0	1	1953	Sep-2021	70	M	African American	DC	MEDICARE	Non-Reactive	Outpatient	Clinic
1	0	1977	Sep-2021	46	F	African American	DC	PRIVATE	Non-Reactive	Outpatient	Clinic
1	0	1940	Sep-2021	83	M	White	MD	MEDICARE	Non-Reactive	Outpatient	Clinic
1	0	1938	Sep-2021	85	M	Other	MD	MEDICARE	Non-Reactive	Outpatient	Clinic
1	0	1996	Sep-2021	27	F	African American	MD	PRIVATE	Non-Reactive	Outpatient	Clinic
1	0	1966	Sep-2021	57	M	African American	MD	PRIVATE	Non-Reactive	Outpatient	Clinic
1	0	1975	Sep-2021	48	M	African American	MD	MEDICAID	Non-Reactive	Outpatient	Clinic
1	0	1991	Sep-2021	32	F	African American	MD	PRIVATE	Non-Reactive	Outpatient	Clinic
1	0	1971	Sep-2021	52	M	African American	MD	MEDICAID	Non-Reactive	Outpatient	Clinic
1	0	1989	Sep-2021	34	F	African American	DC	MEDICARE	Non-Reactive	Outpatient	Clinic
1	0	1973	Sep-2021	50	F	White	DC	PRIVATE	Non-Reactive	Outpatient	Clinic
1	0	1989	Sep-2021	34	F	White	VA	Government	Non-Reactive	Outpatient	Clinic
1	0	1969	Sep-2021	54	F	African American	MD	PRIVATE	Non-Reactive	Outpatient	Clinic
1	0	1966	Sep-2021	57	F	African American	DC		Non-Reactive	Outpatient	Clinic	1	Positive	Sep-2021	Clinic
1	0	1992	Sep-2021	31	M	African American	MD	MEDICARE	Non-Reactive	Outpatient	Clinic
0	1	1952	Sep-2021	71	M	African American	MD	PRIVATE	Non-Reactive	Outpatient	Clinic
1	0	1970	Sep-2021	53	M	African American	DC	PRIVATE	Non-Reactive	Outpatient	Clinic
1	0	1982	Sep-2021	41	F	African American	MD	PRIVATE	Non-Reactive	Outpatient	Clinic
1	0	1975	Sep-2021	48	F	African American	MD	PRIVATE	Non-Reactive	Outpatient	Clinic
1	0	1979	Sep-2021	44	M	White	MD	PRIVATE	Non-Reactive	Outpatient	Clinic
1	0	1980	Sep-2021	43	F	African American	DC	PRIVATE	Non-Reactive	Outpatient	Clinic
1	0	1979	Sep-2021	44	M	African American	MD	PRIVATE	Non-Reactive	Outpatient	Clinic
1	0	1989	Sep-2021	34	F	White	VA	PRIVATE	Non-Reactive	Outpatient	Clinic
1	0	1986	Sep-2021	37	F	White	MD	PRIVATE	Non-Reactive	Outpatient	Clinic
1	0	1992	Sep-2021	31	F	White	MD	PRIVATE	Non-Reactive	Outpatient	Clinic
1	0	1987	Sep-2021	36	F	White	MD	PRIVATE	Non-Reactive	Outpatient	Clinic
1	0	1942	Sep-2021	81	F	African American	MD		Non-Reactive	Outpatient	Clinic
0	1	1957	Sep-2021	66	F	Unknown	MD	PRIVATE	Non-Reactive	Outpatient	Clinic
1	0	1993	Sep-2021	30	F	African American	MD	PRIVATE	Non-Reactive	Outpatient	Clinic
1	0	1976	Sep-2021	47	F	Asian	MD	PRIVATE	Non-Reactive	Outpatient	Clinic
0	1	1962	Sep-2021	61	M	African American	DC		Reactive	Outpatient	Clinic
1	0	1972	Sep-2021	51	M	African American	DC	PRIVATE	Non-Reactive	Outpatient	Clinic
1	0	1972	Sep-2021	51	F	African American	MD	MEDICARE	Non-Reactive	Outpatient	Clinic
1	0	1996	Sep-2021	27	F	White	MD	MEDICAID	Non-Reactive	Outpatient	Clinic
1	0	1978	Sep-2021	45	M	White	DC	PRIVATE	Non-Reactive	Outpatient	Clinic
0	1	1951	Sep-2021	72	M	African American	MD	PRIVATE	Non-Reactive	Outpatient	Clinic
1	0	1995	Sep-2021	28	M	White	VA	PRIVATE	Non-Reactive	Outpatient	Clinic
0	1	1951	Sep-2021	72	M	Unknown			Non-Reactive	Outpatient	Outpatient
1	0	1990	Sep-2021	33	F	African American	MD	MEDICAID	Non-Reactive	Outpatient	Clinic
1	0	1994	Sep-2021	29	M	African American	MD	PRIVATE	Non-Reactive	Outpatient	Clinic
1	0	1979	Sep-2021	44	F	African American	MD	PRIVATE	Non-Reactive	Outpatient	Clinic
0	1	1959	Sep-2021	64	M	White	MD	PRIVATE	Non-Reactive	Outpatient	Clinic
1	0	1970	Sep-2021	53	F	White	MD	PRIVATE	Non-Reactive	Outpatient	Clinic
1	0	1976	Sep-2021	47	M	Asian	MD	PRIVATE	Non-Reactive	Outpatient	Clinic
1	0	1988	Sep-2021	35	F	African American	MD	PRIVATE	Non-Reactive	Outpatient	Clinic
1	0	1983	Sep-2021	40	F	White	MD	Government	Non-Reactive	Outpatient	Clinic
1	0	1966	Sep-2021	57	F	Asian	MD	MEDICAID	Non-Reactive	Outpatient	Clinic
1	0	2002	Sep-2021	21	F	African American	MD	MEDICAID	Non-Reactive	Outpatient	Clinic
0	1	1955	Sep-2021	68	F	White	MD	MEDICARE	Non-Reactive	Outpatient	Clinic
					F	White	MD	MEDICAID				1	Negative	Jul-2020	Clinic
1	0	1988	Sep-2021	35	F	White	DC	PRIVATE	Non-Reactive	Outpatient	Clinic
					F	White	MD	MEDICAID				1	Positive	Jul-2020	Clinic
1	0	1991	Sep-2021	32	M	African American	MD	MEDICAID	Non-Reactive	Outpatient	Clinic
1	0	1989	Sep-2021	34	F	White	MD	PRIVATE	Non-Reactive	Outpatient	Clinic
0	1	1958	Sep-2021	65	F	African American	MD	PRIVATE	Non-Reactive	Outpatient	Clinic
1	0	1976	Sep-2021	47	F	White	MD	MEDICAID	Non-Reactive	Outpatient	Clinic
1	0	1978	Sep-2021	45	F	Other	MD	PRIVATE	Non-Reactive	Outpatient	Clinic
1	0	1967	Sep-2021	56	F	White	DC	PRIVATE	Non-Reactive	Outpatient	Clinic
1	0	1985	Sep-2021	38	M	African American	MD	PRIVATE	Non-Reactive	Outpatient	Clinic
0	1	1963	Sep-2021	60	F	White	MD	PRIVATE	Non-Reactive	Outpatient	Clinic
					F	White	MD	MEDICAID				1	Negative	Jul-2020	Clinic
1	0	1995	Sep-2021	28	F	African American	MD	MEDICAID	Non-Reactive	Outpatient	Clinic
1	0	1942	Sep-2021	81	M	White	MD	MEDICARE	Non-Reactive	Outpatient	Clinic
1	0	1977	Sep-2021	46	F	White	MD	PRIVATE	Non-Reactive	Outpatient	Clinic
0	1	1958	Sep-2021	65	F	White	MD	Government	Non-Reactive	Outpatient	Clinic
0	1	1961	Sep-2021	62	F	African American	DC	PRIVATE	Non-Reactive	Outpatient	Clinic
1	0	1987	Sep-2021	36	M	White	MD	PRIVATE	Non-Reactive	Outpatient	Clinic
1	0	1993	Sep-2021	30	F	White	MD	PRIVATE	Non-Reactive	Outpatient	Clinic
1	0	1988	Sep-2021	35	F	White	DC		Non-Reactive	Outpatient	Clinic
0	1	1953	Sep-2021	70	F	African American	MD	SELF PAY	Non-Reactive	Outpatient	Clinic
1	0	1976	Sep-2021	47	F	White	MD	PRIVATE	Non-Reactive	Outpatient	Clinic
1	0	1995	Sep-2021	28	M	White	MD	PRIVATE	Non-Reactive	Outpatient	Clinic
1	0	1981	Sep-2021	42	F	African American	MD	PRIVATE	Non-Reactive	Outpatient	Clinic
1	0	1985	Sep-2021	38	F	White	DC	PRIVATE	Non-Reactive	Outpatient	Clinic
0	1	1961	Sep-2021	62	F	White	MD	PRIVATE	Non-Reactive	Outpatient	Clinic
1	0	1988	Sep-2021	35	F	White	MD	PRIVATE	Non-Reactive	Outpatient	Clinic
1	0	1983	Sep-2021	40	F	White	DC	PRIVATE	Non-Reactive	Outpatient	Clinic
1	0	1996	Sep-2021	27	F	Asian	MD	PRIVATE	Non-Reactive	Outpatient	Clinic
1	0	1985	Sep-2021	38	F	White	DC	PRIVATE	Non-Reactive	Outpatient	Clinic
1	0	1967	Sep-2021	56	F	African American	MD	PRIVATE	Non-Reactive	Outpatient	Clinic
1	0	1991	Sep-2021	32	F	African American	DC	MEDICAID	Non-Reactive	Outpatient	Clinic
0	1	1962	Sep-2021	61	M	White	MD	PRIVATE	Non-Reactive	Outpatient	Clinic
1	0	1985	Sep-2021	38	F	African American	MD	PRIVATE	Non-Reactive	Outpatient	Clinic
0	1	1959	Sep-2021	64	F	White	DC		Non-Reactive	Outpatient	Clinic
1	0	1995	Sep-2021	28	F	African American	DC	PRIVATE	Non-Reactive	Outpatient	Clinic
1	0	1993	Sep-2021	30	F	White	VA	PRIVATE	Non-Reactive	Outpatient	Clinic
1	0	1983	Sep-2021	40	F	White	MD	PRIVATE	Non-Reactive	Outpatient	Clinic
1	0	1988	Sep-2021	35	F	White	MD	PRIVATE	Non-Reactive	Outpatient	Clinic
0	1	1962	Sep-2021	61	F	African American	DC		Non-Reactive	Outpatient	Clinic
1	0	1989	Sep-2021	34	F	White	MD	PRIVATE	Non-Reactive	Outpatient	Clinic
0	1	1958	Sep-2021	65	M	African American	DC		Non-Reactive	Outpatient	Clinic
1	0	1976	Sep-2021	47	F	White	MD	PRIVATE	Non-Reactive	Outpatient	Clinic
1	0	1967	Sep-2021	56	M	White	MD	MEDICARE	Non-Reactive	Outpatient	Clinic
0	1	1959	Sep-2021	64	F	African American	MD	MEDICAID	Non-Reactive	Outpatient	Clinic
1	0	1985	Sep-2021	38	F	White	DC	PRIVATE	Non-Reactive	Outpatient	Clinic
1	0	1943	Sep-2021	80	M	White	MD	MEDICARE	Non-Reactive	Outpatient	Clinic
1	0	1987	Sep-2021	36	F	Unknown	DC	PRIVATE	Non-Reactive	Outpatient	Clinic
1	0	1994	Sep-2021	29	F	White	DC	PRIVATE	Non-Reactive	Outpatient	Clinic
1	0	1992	Sep-2021	31	F	Other	MD	PRIVATE	Non-Reactive	Outpatient	Clinic
0	1	1955	Sep-2021	68	F	Unknown	MD	PRIVATE	Non-Reactive	Outpatient	Clinic
0	1	1963	Sep-2021	60	M	African American	MD	MEDICAID	Non-Reactive	Outpatient	Clinic
1	0	1998	Sep-2021	25	F	White	MD	MEDICAID	Non-Reactive	Outpatient	Clinic
0	1	1961	Sep-2021	62	F	White	VA	PRIVATE	Non-Reactive	Outpatient	Clinic
					F	White	MD	MEDICARE				1	Negative	Jul-2020	Clinic
1	0	1978	Sep-2021	45	M	White	MD	PRIVATE	Non-Reactive	Outpatient	Clinic
1	0	1994	Sep-2021	29	F	African American	DC	PRIVATE	Non-Reactive	Outpatient	Clinic
1	0	1972	Sep-2021	51	M	African American	MD		Non-Reactive	Outpatient	Clinic
1	0	1944	Sep-2021	79	M	White	MD	PRIVATE	Non-Reactive	Outpatient	Clinic
1	0	1976	Sep-2021	47	F	African American	MD	PRIVATE	Non-Reactive	Outpatient	Clinic
1	0	1982	Sep-2021	41	F	African American	MD	MEDICAID	Non-Reactive	Outpatient	Clinic
1	0	1983	Sep-2021	40	F	White	DC	PRIVATE	Non-Reactive	Outpatient	Clinic
0	1	1963	Sep-2021	60	M	White	VA	PRIVATE	Non-Reactive	Outpatient	Clinic
1	0	1987	Sep-2021	36	F	White	MD	MEDICAID	Reactive	Outpatient	Clinic	1	Negative	Sep-2021	Clinic
1	0	1995	Sep-2021	28	F	White	DC	PRIVATE	Non-Reactive	Outpatient	Clinic
1	0	2001	Sep-2021	22	F	White	MD		Non-Reactive	Outpatient	Clinic
					F	White	MD		Non-Reactive		Outpatient Message
1	0	1996	Sep-2021	27	F	Unknown	DC	PRIVATE	Non-Reactive	Outpatient	Clinic
1	0	1995	Sep-2021	28	M	Multiple	MD		Non-Reactive	Outpatient	Clinic
1	0	1983	Sep-2021	40	M	African American	MD	PRIVATE	Non-Reactive	Outpatient	Clinic
1	0	1987	Sep-2021	36	F	White	MD		Non-Reactive	Outpatient	Clinic
1	0	1973	Sep-2021	50	F	African American	MD	PRIVATE	Non-Reactive	Outpatient	Clinic
1	0	2004	Sep-2021	19	M	Declined to Answer	MD	MEDICAID	Non-Reactive	Outpatient	Clinic
1	0	1969	Sep-2021	54	M	Asian	DC	PRIVATE	Non-Reactive	Outpatient	Clinic
0	1	1954	Sep-2021	69	M	White	MD	MEDICARE	Non-Reactive	Outpatient	Clinic
1	0	1981	Sep-2021	42	F	African American	MD	MEDICAID	Non-Reactive	Outpatient	Clinic
1	0	1981	Sep-2021	42	M	White	MD	PRIVATE	Non-Reactive	Outpatient	Clinic
1	0	1988	Sep-2021	35	F	African American	MD	SELF PAY	Non-Reactive	Outpatient	Clinic
0	1	1963	Sep-2021	60	M	African American	MD	MEDICARE	Non-Reactive	Outpatient	Clinic
1	0	1944	Sep-2021	79	F	African American	MD	MEDICARE	Non-Reactive	Outpatient	Clinic
1	0	1976	Sep-2021	47	M	Unknown	MD	PRIVATE	Non-Reactive	Outpatient	Clinic
1	0	1984	Sep-2021	39	F	African American	MD	MEDICAID	Non-Reactive	Outpatient	Clinic
1	0	1975	Sep-2021	48	M	Asian	VA	PRIVATE	Non-Reactive	Outpatient	Clinic
1	0	1997	Sep-2021	26	M	White	MD	SELF PAY	Non-Reactive	Outpatient	Clinic
1	0	1989	Sep-2021	34	F	White	MD	PRIVATE	Non-Reactive	Outpatient	Clinic
1	0	2001	Sep-2021	22	F	White	MD		Non-Reactive	Outpatient	Clinic
1	0	1942	Sep-2021	81	F	White	MD	MEDICARE	Non-Reactive	Outpatient	Clinic
1	0	1983	Sep-2021	40	M	Other	MD	PRIVATE	Non-Reactive	Outpatient	Clinic
1	0	1985	Sep-2021	38	M	White	DC	PRIVATE	Non-Reactive	Outpatient	Clinic
1	0	1988	Sep-2021	35	F	Other	DC	MEDICAID	Non-Reactive	Outpatient	Clinic
1	0	1967	Sep-2021	56	F	African American	DC	PRIVATE	Non-Reactive	Outpatient	Clinic
1	0	1991	Sep-2021	32	F	Asian	MD	MEDICAID	Non-Reactive	Outpatient	Clinic
1	0	1994	Sep-2021	29	F	White	MD	PRIVATE	Non-Reactive	Outpatient	Clinic
0	1	1952	Sep-2021	71	F	Asian	MD	MEDICAID	Non-Reactive	Outpatient	Clinic
1	0	1995	Sep-2021	28	F	Other	MD	PRIVATE	Non-Reactive	Outpatient	Clinic
					F	African American	MD	PRIVATE				1	Negative	Jul-2020	Clinic
1	0	1996	Sep-2021	27	F	White	MD	PRIVATE	Non-Reactive	Outpatient	Clinic
1	0	1991	Sep-2021	32	F	African American	MD	PRIVATE	Non-Reactive	Outpatient	Clinic
1	0	1991	Sep-2021	32	F	African American	MD	PRIVATE	Non-Reactive	Outpatient	Clinic
1	0	1945	Sep-2021	78	F	Other	MD	PRIVATE	Non-Reactive	Outpatient	Clinic
1	0	1982	Sep-2021	41	M	African American	DC		Non-Reactive	Outpatient	Clinic
1	0	1993	Sep-2021	30	F	African American	MD	PRIVATE	Non-Reactive	Outpatient	Clinic
1	0	1970	Sep-2021	53	F	White	DC	PRIVATE	Non-Reactive	Outpatient	Clinic
0	1	1954	Sep-2021	69	M	White	MD	MEDICARE	Non-Reactive	Outpatient	Clinic
					F	African American	MD	MEDICARE				1	Negative	Jul-2020	Clinic
1	0	1986	Sep-2021	37	F	White	DC	MEDICAID	Non-Reactive	Outpatient	Clinic
1	0	1986	Sep-2021	37	F	White	MD	PRIVATE	Non-Reactive	Outpatient	Clinic
1	0	1971	Sep-2021	52	F		MD	PRIVATE	Non-Reactive	Outpatient	Clinic
1	0	1973	Sep-2021	50	M	African American	MD	MEDICAID	Non-Reactive	Outpatient	Clinic
1	0	1991	Sep-2021	32	M	Unknown	MD		Non-Reactive	Outpatient	Clinic
1	0	1994	Sep-2021	29	F	African American	MD	MEDICAID	Non-Reactive	Outpatient	Clinic
1	0	1975	Sep-2021	48	F	White	MD	PRIVATE	Non-Reactive	Outpatient	Clinic
1	0	2003	Sep-2021	20	F	Unknown	MD	PRIVATE	Non-Reactive	Outpatient	Clinic
1	0	1998	Sep-2021	25	F	African American	DC	PRIVATE	Non-Reactive	Outpatient	Clinic
1	0	2006	Sep-2021	17	F	African American	MD	MEDICAID	Non-Reactive	Outpatient	Clinic
1	0	1998	Sep-2021	25	M	African American	MD	MEDICAID	Non-Reactive	Outpatient	Clinic
1	0	1991	Sep-2021	32	M	Unknown	MD		Non-Reactive	Outpatient	Clinic
1	0	1974	Sep-2021	49	M	Unknown	MD		Non-Reactive	Outpatient	Clinic
1	0	1977	Sep-2021	46	M	White	MD	PRIVATE	Non-Reactive	Outpatient	Clinic
1	0	1984	Sep-2021	39	M	Unknown	DC	PRIVATE	Non-Reactive	Outpatient	Clinic
1	0	1997	Sep-2021	26	F	White	MD		Non-Reactive	Outpatient	Clinic
1	0	2000	Sep-2021	23	M	Other	FL	PRIVATE	Non-Reactive	Outpatient	Clinic
1	0	1968	Sep-2021	55	M	Unknown	VA	PRIVATE	Non-Reactive	Outpatient	Clinic
1	0	1965	Sep-2021	58	F	White	MD	PRIVATE	Non-Reactive	Outpatient	Clinic
1	0	1976	Sep-2021	47	M	White	MD	PRIVATE	Non-Reactive	Outpatient	Clinic
0	1	1959	Sep-2021	64	M	White	MD	MEDICAID	Non-Reactive	Outpatient	Clinic
0	1	1964	Sep-2021	59	F	African American	MD	PRIVATE	Non-Reactive	Outpatient	Clinic
					F	White	MD	MEDICARE				1	Positive	Jul-2020	Clinic
0	1	1961	Sep-2021	62	F	African American	MD	MEDICAID	Non-Reactive	Outpatient	Clinic
1	0	1994	Sep-2021	29	F	Other	DC	PRIVATE	Non-Reactive	Outpatient	Clinic
1	0	1979	Sep-2021	44	F	African American	MD	PRIVATE	Non-Reactive	Outpatient	Clinic
0	1	1951	Sep-2021	72	M	Asian	MD	MEDICARE	Non-Reactive	Outpatient	Clinic
1	0	1988	Sep-2021	35	F	White	DC	PRIVATE	Non-Reactive	Outpatient	Clinic
1	0	1996	Sep-2021	27	M	Asian	VA	PRIVATE	Non-Reactive	Outpatient	Clinic
1	0	1995	Sep-2021	28	M	African American	MD	PRIVATE	Non-Reactive	Outpatient	Clinic
1	0	2001	Sep-2021	22	M	African American	NJ		Non-Reactive	Outpatient	Clinic
1	0	2003	Sep-2021	20	F	Unknown	NH		Non-Reactive	Outpatient	Clinic
1	0	1990	Sep-2021	33	F	African American	MD	PRIVATE	Non-Reactive	Outpatient	Clinic
1	0	2001	Sep-2021	22	M	White	MD		Non-Reactive	Outpatient	Clinic	1	Negative	Sep-2021	Clinic
1	0	1970	Sep-2021	53	M	White	MD	PRIVATE	Non-Reactive	Outpatient	Clinic
1	0	1981	Sep-2021	42	M	Unknown	DC	PRIVATE	Non-Reactive	Outpatient	Clinic
1	0	1988	Sep-2021	35	F	Unknown	VA	PRIVATE	Non-Reactive	Outpatient	Clinic
0	1	1954	Sep-2021	69	F	White	VA	MEDICARE	Non-Reactive	Outpatient	Clinic
1	0	1996	Sep-2021	27	F	White	DC		Non-Reactive	Outpatient	Clinic
1	0	1980	Sep-2021	43	F	White	MD	MEDICAID	Non-Reactive	Outpatient	Clinic
1	0	1971	Sep-2021	52	F	White	MD		Non-Reactive	Outpatient	Clinic
0	1	1964	Sep-2021	59	F	White	MD		Non-Reactive	Outpatient	Clinic
					F	White	MD	PRIVATE				1	Negative	Jul-2020	Clinic
1	0	2001	Sep-2021	22	F	White	MD	MEDICAID	Non-Reactive	Outpatient	Clinic
1	0	2005	Sep-2021	18	F	Multiple	MD	MEDICAID	Non-Reactive	Outpatient	Clinic
1	0	1943	Sep-2021	80	F	White	MD	MEDICARE	Non-Reactive	Outpatient	Clinic
0	1	1952	Sep-2021	71	F	White	MD	MEDICARE	Non-Reactive	Outpatient	Clinic
0	1	1950	Sep-2021	73	M	African American	MD	PRIVATE	Non-Reactive	Outpatient	Clinic
1	0	1967	Sep-2021	56	F	African American	MD	MEDICARE	Non-Reactive	Outpatient	Clinic
1	0	1999	Sep-2021	24	F	White	MD	MEDICAID	Non-Reactive	Outpatient	Clinic
1	0	1975	Sep-2021	48	F	White	MD	PRIVATE	Non-Reactive	Outpatient	Clinic
0	1	1956	Sep-2021	67	F	African American	MD	MEDICARE	Reactive	Outpatient	Clinic	1	Negative	Sep-2021	Clinic
1	0	1980	Sep-2021	43	F	African American	MD	MEDICAID	Non-Reactive	Outpatient	Clinic
1	0	1971	Sep-2021	52	F	African American	MD	PRIVATE	Non-Reactive	Outpatient	Clinic
1	0	1942	Sep-2021	81	M	White	MD	PRIVATE	Non-Reactive	Outpatient	Clinic
0	1	1946	Sep-2021	77	F	Asian	DC	MEDICARE	Non-Reactive	Outpatient	Clinic
1	0	1972	Sep-2021	51	F	White	DC		Non-Reactive	Outpatient	Clinic
1	0	2004	Sep-2021	19	F	African American	MD		Non-Reactive	Outpatient	Clinic
1	0	1969	Sep-2021	54	M	White	MD	PRIVATE	Non-Reactive	Outpatient	Clinic
1	0	1942	Sep-2021	81	F	African American	DC	MEDICARE	Non-Reactive	Outpatient	Clinic
					F	White	MD	MEDICAID				1	Negative	Jul-2020	Clinic
1	0	1973	Sep-2021	50	M	African American	DC	Government	Non-Reactive	Outpatient	Clinic
1	0	1990	Sep-2021	33	F	African American	DC		Non-Reactive	Outpatient	Clinic
0	1	1964	Sep-2021	59	F	Other	MD	MEDICAID	Non-Reactive	Outpatient	Clinic
0	1	1954	Sep-2021	69	F	African American	DC	MEDICARE	Non-Reactive	Outpatient	Clinic
0	1	1964	Sep-2021	59	F	White	DC	PRIVATE	Non-Reactive	Outpatient	Clinic
0	1	1960	Sep-2021	63	F	White	MD	PRIVATE	Non-Reactive	Outpatient	Clinic
1	0	1976	Sep-2021	47	F	White	FL	PRIVATE	Non-Reactive	Outpatient	Clinic
					F	African American	MD	MEDICARE				1	Negative	Jul-2020	Clinic
0	1	1956	Sep-2021	67	F	African American	MD	MEDICAID	Non-Reactive	Outpatient	Clinic
1	0	1988	Sep-2021	35	F	African American	DC		Non-Reactive	Outpatient	Clinic
1	0	1979	Sep-2021	44	F	African American	DC		Non-Reactive	Outpatient	Clinic
0	1	1961	Sep-2021	62	F	African American	MD	PRIVATE	Non-Reactive	Outpatient	Clinic
1	0	1975	Sep-2021	48	M	African American	MD	PRIVATE	Non-Reactive	Outpatient	Clinic
1	0	1965	Sep-2021	58	M	White	MD	MEDICAID	Non-Reactive	Outpatient	Clinic
1	0	1989	Sep-2021	34	M	White	MD	PRIVATE	Non-Reactive	Outpatient	Clinic
0	1	1963	Sep-2021	60	M	African American	MD	MEDICARE	Non-Reactive	Outpatient	Clinic
0	1	1964	Sep-2021	59	M	African American	MD		Non-Reactive	Outpatient	Clinic	1	Negative	Sep-2021	Clinic
1	0	1981	Sep-2021	42	M	African American	MD	MEDICAID	Non-Reactive	Outpatient	Clinic
1	0	1967	Sep-2021	56	F	African American	MD	MEDICAID	Reactive	Outpatient	Clinic
					F	African American	MD					1	Negative	Jul-2020	Clinic
1	0	1968	Sep-2021	55	F	African American	DC		Non-Reactive	Outpatient	Clinic
					M	African American	MD	MEDICARE				1	Positive	Jul-2020	Clinic
1	0	1945	Sep-2021	78	F	White	MD	PRIVATE	Non-Reactive	Outpatient	Clinic
1	0	1966	Sep-2021	57	F	African American	MD	PRIVATE	Non-Reactive	Outpatient	Clinic
1	0	2000	Sep-2021	23	F	American Indian or Alaska Native	MD	MEDICAID	Non-Reactive	Outpatient	Clinic
1	0	1995	Sep-2021	28	M	White	MD	PRIVATE	Non-Reactive	Outpatient	Clinic
1	0	1985	Sep-2021	38	M	White	MD	MEDICAID	Non-Reactive	Outpatient	Clinic
0	1	1948	Sep-2021	75	F	African American	MD	MEDICARE	Non-Reactive	Outpatient	Recurring Clinic
1	0	1990	Sep-2021	33	F	African American	MD	MEDICAID	Non-Reactive	Outpatient	Clinic
1	0	1994	Sep-2021	29	F	African American	MD	MEDICAID	Non-Reactive	Outpatient	Clinic
1	0	1988	Sep-2021	35	F	White	MD	MEDICAID	Non-Reactive	Outpatient	Clinic
1	0	1944	Sep-2021	79	M	White	DC	PRIVATE	Non-Reactive	Outpatient	Clinic
0	1	1962	Sep-2021	61	M	African American	MD	MEDICAID	Non-Reactive	Outpatient	Clinic
1	0	1972	Sep-2021	51	M	African American	MD	PRIVATE	Non-Reactive	Outpatient	Clinic
1	0	1990	Sep-2021	33	M	Declined to Answer	MD	MEDICAID	Non-Reactive	Outpatient	Clinic
1	0	1974	Sep-2021	49	F	Other	MD	PRIVATE	Non-Reactive	Outpatient	Clinic
1	0	1979	Sep-2021	44	F	Other	MD	MEDICAID	Non-Reactive	Outpatient	Clinic
1	0	1944	Sep-2021	79	F	African American	MD	MEDICARE	Non-Reactive	Outpatient	Clinic
1	0	1970	Sep-2021	53	F	White	MD	MEDICAID	Non-Reactive	Outpatient	Clinic
1	0	1966	Sep-2021	57	F	White	DC	SELF PAY	Non-Reactive	Outpatient	Clinic
1	0	1966	Sep-2021	57	F	Declined to Answer	DC	PRIVATE	Non-Reactive	Outpatient	Clinic
0	1	1952	Sep-2021	71	F	African American	DC		Reactive	Outpatient	Clinic	1	Negative	Sep-2021	Clinic
1	0	1993	Sep-2021	30	F	African American	MD	MEDICAID	Non-Reactive	Outpatient	Clinic
1	0	1996	Sep-2021	27	F	African American	MD	MEDICAID	Non-Reactive	Outpatient	Clinic
1	0	1991	Sep-2021	32	F	White	MD	MEDICAID	Non-Reactive	Outpatient	Clinic
1	0	1987	Sep-2021	36	F	White	MD	PRIVATE	Non-Reactive	Outpatient	Clinic
1	0	1986	Sep-2021	37	M	Declined to Answer	MD	MEDICAID	Non-Reactive	Outpatient	Clinic
1	0	1992	Sep-2021	31	F	African American	MD	MEDICAID	Non-Reactive	Outpatient	Clinic
1	0	1985	Sep-2021	38	F	African American	MD	PRIVATE	Non-Reactive	Outpatient	Clinic
0	1	1962	Sep-2021	61	M	African American	DC	MEDICARE	Non-Reactive	Outpatient	Clinic
1	0	1971	Sep-2021	52	F	White	MD	PRIVATE	Non-Reactive	Outpatient	Clinic
1	0	1992	Sep-2021	31	F	White	DC	PRIVATE	Non-Reactive	Outpatient	Clinic
1	0	1966	Sep-2021	57	M	African American	MD	PRIVATE	Non-Reactive	Outpatient	Clinic
1	0	1967	Sep-2021	56	F	African American	MD	MEDICAID	Non-Reactive	Outpatient	Clinic
0	1	1956	Sep-2021	67	F	White	DC	MEDICARE	Non-Reactive	Outpatient	Clinic
1	0	1994	Sep-2021	29	F	White	DC	PRIVATE	Non-Reactive	Outpatient	Clinic
1	0	1977	Sep-2021	46	M	White	MD	MEDICAID	Non-Reactive	Outpatient	Clinic
1	0	1970	Sep-2021	53	F	African American	MD		Non-Reactive	Outpatient	Clinic
0	1	1961	Sep-2021	62	M	White	MD	PRIVATE	Non-Reactive	Outpatient	Clinic
0	1	1959	Sep-2021	64	F	White	MD	PRIVATE	Non-Reactive	Outpatient	Clinic
0	1	1950	Sep-2021	73	M	African American	MD	PRIVATE	Non-Reactive	Outpatient	Clinic
1	0	1998	Sep-2021	25	F	White	MD		Non-Reactive	Outpatient	Clinic
1	0	1986	Sep-2021	37	F	White	MD	MEDICAID	Non-Reactive	Outpatient	Clinic
0	1	1947	Sep-2021	76	M	White	MD	MEDICARE	Non-Reactive	Outpatient	Clinic
1	0	1975	Sep-2021	48	F	African American	MD	PRIVATE	Non-Reactive	Outpatient	Clinic
					F	African American	MD	PRIVATE				1	Negative	Jul-2020	Clinic
1	0	1967	Sep-2021	56	F	Other	DC	MEDICAID	Non-Reactive	Outpatient	Clinic
1	0	1987	Sep-2021	36	F	African American	MD	PRIVATE	Non-Reactive	Outpatient	Clinic
1	0	1971	Sep-2021	52	F	African American	MD	PRIVATE	Non-Reactive	Outpatient	Clinic
1	0	1967	Sep-2021	56	F	White	MD	PRIVATE	Non-Reactive	Outpatient	Clinic
1	0	1968	Sep-2021	55	F	White	MD	PRIVATE	Non-Reactive	Outpatient	Clinic
1	0	1985	Sep-2021	38	M	White	MD	PRIVATE	Non-Reactive	Outpatient	Clinic
1	0	1995	Sep-2021	28	F	White	MD	PRIVATE	Non-Reactive	Outpatient	Clinic
1	0	1991	Sep-2021	32	F	African American	MD	PRIVATE	Non-Reactive	Outpatient	Clinic
1	0	1966	Sep-2021	57	F	African American	MD	MEDICAID	Non-Reactive	Outpatient	Clinic
1	0	1969	Sep-2021	54	M	African American	MD	PRIVATE	Non-Reactive	Outpatient	Clinic
					F	African American	DC	MEDICARE				1	Negative	Jul-2020	Clinic
					F	White	VA	PRIVATE				1	Negative	Jul-2020	Clinic
1	0	1980	Sep-2021	43	M	White	MD	MEDICAID	Non-Reactive	Outpatient	Clinic
0	1	1948	Sep-2021	75	F	White	MD	MEDICARE	Non-Reactive	Outpatient	Clinic
					F	African American	MD	PRIVATE	Non-Reactive		Outpatient Message
1	0	1975	Sep-2021	48	M	White	MD	PRIVATE	Non-Reactive	Outpatient	Clinic
1	0	1991	Sep-2021	32	M	White	MD	PRIVATE	Non-Reactive	Outpatient	Clinic
1	0	1984	Sep-2021	39	F	African American	DC	PRIVATE	Non-Reactive	Outpatient	Clinic
					M	White	DC	PRIVATE	Non-Reactive		Client
0	1	1951	Sep-2021	72	F	African American	MD	MEDICARE	Non-Reactive	Outpatient	Clinic
1	0	1975	Sep-2021	48	F	White	VA	PRIVATE	Non-Reactive	Outpatient	Clinic
1	0	1977	Sep-2021	46	F	White	DC		Non-Reactive	Outpatient	Clinic
1	0	1994	Sep-2021	29	F	African American	MD	MEDICAID	Non-Reactive	Outpatient	Clinic
1	0	1994	Sep-2021	29	F	White	MD	PRIVATE	Non-Reactive	Outpatient	Clinic
0	1	1957	Sep-2021	66	F	White	MD	PRIVATE	Non-Reactive	Outpatient	Clinic
1	0	1976	Sep-2021	47	F	Other	DC	PRIVATE	Non-Reactive	Outpatient	Clinic
1	0	1985	Sep-2021	38	F	African American	MD	MEDICAID	Non-Reactive	Outpatient	Clinic
1	0	1990	Sep-2021	33	F	White	MD	MEDICAID	Non-Reactive	Outpatient	Clinic
1	0	1972	Sep-2021	51	F	African American	MD	PRIVATE	Non-Reactive	Outpatient	Clinic
1	0	1943	Sep-2021	80	M	African American	DC	MEDICARE	Non-Reactive	Outpatient	Clinic
1	0	1972	Sep-2021	51	M	White	MD	PRIVATE	Non-Reactive	Outpatient	Clinic
1	0	1987	Sep-2021	36	F	White	DC	PRIVATE	Non-Reactive	Outpatient	Clinic
0	1	1957	Sep-2021	66	F	White	MD	PRIVATE	Non-Reactive	Outpatient	Clinic
					F	White	DC	PRIVATE				1	Negative	Jul-2020	Clinic
1	0	1988	Sep-2021	35	M	Asian	DC	PRIVATE	Non-Reactive	Outpatient	Clinic
1	0	1981	Sep-2021	42	F	African American	MD	PRIVATE	Non-Reactive	Outpatient	Clinic
1	0	1975	Sep-2021	48	F	White	MD	PRIVATE	Non-Reactive	Outpatient	Clinic
1	0	1974	Sep-2021	49	F	African American	MD		Non-Reactive	Outpatient	Clinic
1	0	1990	Sep-2021	33	F	African American	MD	MEDICAID	Non-Reactive	Outpatient	Clinic
1	0	1988	Sep-2021	35	F	African American	DC	PRIVATE	Non-Reactive	Outpatient	Clinic
1	0	1989	Sep-2021	34	F	White	DC	PRIVATE	Non-Reactive	Outpatient	Clinic
1	0	1968	Sep-2021	55	M	White	MD	PRIVATE	Non-Reactive	Outpatient	Clinic
1	0	1975	Sep-2021	48	M	Unknown	MD	MEDICARE	Non-Reactive	Outpatient	Clinic
1	0	1999	Sep-2021	24	M	African American	MD	MEDICAID	Non-Reactive	Outpatient	Clinic
1	0	1983	Sep-2021	40	M	Multiple	MD	PRIVATE	Non-Reactive	Outpatient	Clinic
1	0	1998	Sep-2021	25	F	White	DC	PRIVATE	Non-Reactive	Outpatient	Clinic
0	1	1956	Sep-2021	67	F	African American	DC		Non-Reactive	Outpatient	Clinic
0	1	1962	Sep-2021	61	M	Unknown	DC	PRIVATE	Non-Reactive	Outpatient	Clinic
1	0	1988	Sep-2021	35	F	African American	MD	MEDICAID	Non-Reactive	Outpatient	Clinic
1	0	1988	Sep-2021	35	F	White	DC	PRIVATE	Non-Reactive	Outpatient	Clinic
1	0	1983	Sep-2021	40	F	African American	DC	PRIVATE	Non-Reactive	Outpatient	Clinic
0	1	1957	Sep-2021	66	M	White	MD	PRIVATE	Non-Reactive	Outpatient	Clinic
1	0	1972	Sep-2021	51	F	Other	VA	PRIVATE	Non-Reactive	Outpatient	Clinic
1	0	1986	Sep-2021	37	F	African American	MD	PRIVATE	Non-Reactive	Outpatient	Clinic
1	0	1974	Sep-2021	49	M	American Indian or Alaska Native	VA	PRIVATE	Non-Reactive	Outpatient	Clinic
1	0	1986	Sep-2021	37	F	Declined to Answer	DC	PRIVATE	Non-Reactive	Outpatient	Clinic
1	0	1977	Sep-2021	46	F	Other	MD	PRIVATE	Non-Reactive	Outpatient	Clinic
1	0	1991	Sep-2021	32	M	White	DC	PRIVATE	Non-Reactive	Outpatient	Clinic
1	0	2000	Sep-2021	23	M	White	FL	PRIVATE	Non-Reactive	Outpatient	Clinic
1	0	1993	Sep-2021	30	M	Multiple	DC		Non-Reactive	Outpatient	Clinic
1	0	1969	Sep-2021	54	F	African American	MD	PRIVATE	Non-Reactive	Outpatient	Clinic
1	0	1991	Sep-2021	32	F	White	MD	PRIVATE	Non-Reactive	Outpatient	Clinic
1	0	1973	Sep-2021	50	F	Other	MD	PRIVATE	Non-Reactive	Outpatient	Clinic
1	0	1976	Sep-2021	47	F	African American	MD	MEDICAID	Non-Reactive	Outpatient	Clinic
0	1	1954	Sep-2021	69	F	White	NH	PRIVATE	Non-Reactive	Outpatient	Clinic
0	1	1960	Sep-2021	63	M	Declined to Answer	VA		Non-Reactive	Outpatient	Clinic
1	0	1979	Sep-2021	44	F	Other	MD	PRIVATE	Non-Reactive	Outpatient	Clinic
1	0	1993	Sep-2021	30	F	African American	MD	PRIVATE	Non-Reactive	Outpatient	Clinic
1	0	1980	Sep-2021	43	F	Asian	VA		Non-Reactive	Outpatient	Clinic
1	0	1980	Sep-2021	43	M	Asian	MD	PRIVATE	Non-Reactive	Outpatient	Clinic
					F	African American	MD	PRIVATE				1	Negative	Jul-2020	Clinic
1	0	1981	Sep-2021	42	M	African American	MD	MEDICAID	Non-Reactive	Outpatient	Clinic
0	1	1955	Sep-2021	68	F	Unknown	MD	MEDICARE	Non-Reactive	Outpatient	Clinic
					M	African American	MD	PRIVATE				1	Negative	Jul-2020	Clinic
1	0	1984	Sep-2021	39	M	White	MD	PRIVATE	Non-Reactive	Outpatient	Clinic
					M	White	MD	PRIVATE	Non-Reactive		Outpatient Message
1	0	1994	Sep-2021	29	F	African American	MD	PRIVATE	Non-Reactive	Outpatient	Clinic
1	0	1995	Sep-2021	28	F	Other	MD	PRIVATE	Non-Reactive	Outpatient	Clinic
1	0	1978	Sep-2021	45	F	White	MD	MEDICAID	Non-Reactive	Outpatient	Clinic
1	0	1966	Sep-2021	57	F	Multiple	MD	PRIVATE	Non-Reactive	Outpatient	Clinic
1	0	1991	Sep-2021	32	M	White	DC	PRIVATE	Non-Reactive	Outpatient	Clinic
1	0	1990	Sep-2021	33	F	Unknown	MD	PRIVATE	Non-Reactive	Outpatient	Clinic
0	1	1959	Sep-2021	64	F	African American	MD	MEDICARE	Non-Reactive	Outpatient	Clinic	1	Negative	Sep-2021	Clinic
1	0	1987	Sep-2021	36	F	African American	MD	PRIVATE	Non-Reactive	Outpatient	Clinic
1	0	1981	Sep-2021	42	F	Unknown	VA		Non-Reactive	Outpatient	Clinic
0	1	1950	Sep-2021	73	F	White	MD	MEDICARE	Non-Reactive	Outpatient	Clinic
1	0	1966	Sep-2021	57	F	White	MD	MEDICAID	Non-Reactive	Outpatient	Clinic
1	0	1993	Sep-2021	30	F	Unknown	DC	PRIVATE	Non-Reactive	Outpatient	Clinic
					F	White	VA	PRIVATE				1	Negative	Jul-2020	Clinic
1	0	1999	Sep-2021	24	F	Multiple	MD	PRIVATE	Non-Reactive	Outpatient	Clinic
1	0	1989	Sep-2021	34	F	Other	MD		Non-Reactive	Outpatient	Clinic
0	1	1956	Sep-2021	67	F	White	DC	MEDICARE	Non-Reactive	Outpatient	Clinic
1	0	1994	Sep-2021	29	F	African American	DC		Non-Reactive	Outpatient	Clinic
1	0	1974	Sep-2021	49	F	White	MD	MEDICAID	Non-Reactive	Outpatient	Clinic
					F	African American	MD	MEDICAID				1	Negative	Jul-2020	Clinic
1	0	1974	Sep-2021	49	F	Other	MD	MEDICAID	Non-Reactive	Outpatient	Clinic
1	0	1996	Sep-2021	27	M	African American	DC	PRIVATE	Non-Reactive	Outpatient	Clinic
1	0	1966	Sep-2021	57	M	Unknown	DC	PRIVATE	Non-Reactive	Outpatient	Clinic
1	0	1977	Sep-2021	46	M	African American	DC	PRIVATE	Non-Reactive	Outpatient	Clinic
0	1	1957	Sep-2021	66	F	Unknown	MD	MEDICAID	Non-Reactive	Outpatient	Clinic
0	1	1953	Sep-2021	70	M		MD	PRIVATE	Non-Reactive	Outpatient	Clinic
1	0	1974	Sep-2021	49	F	White	VA	PRIVATE	Non-Reactive	Outpatient	Clinic
1	0	1981	Sep-2021	42	M	White	MD		Non-Reactive	Outpatient	Clinic
1	0	1971	Sep-2021	52	F	African American	MD	PRIVATE	Non-Reactive	Outpatient	Clinic
1	0	1995	Sep-2021	28	M	Unknown	DC	PRIVATE	Non-Reactive	Outpatient	Clinic
					F	White	VA	MEDICARE				1	Negative	Jul-2020	Clinic
1	0	1968	Sep-2021	55	M	White	PA	PRIVATE	Non-Reactive	Outpatient	Clinic
1	0	1990	Sep-2021	33	F	Unknown	MD	PRIVATE	Non-Reactive	Outpatient	Clinic
1	0	1988	Sep-2021	35	F	African American	DC		Non-Reactive	Outpatient	Clinic
1	0	1998	Sep-2021	25	F	White	DC	PRIVATE	Non-Reactive	Outpatient	Clinic
					F	White	DC	PRIVATE				1	Negative	Jul-2020	Clinic
1	0	1993	Sep-2021	30	F	White	DC	PRIVATE	Non-Reactive	Outpatient	Clinic
					F	White	VA	PRIVATE				1	Negative	Jul-2020	Clinic
					F	White	DC	PRIVATE				1	Negative	Jul-2020	Clinic
1	0	1978	Sep-2021	45	F	White	MD	MEDICAID	Non-Reactive	Outpatient	Clinic
1	0	1987	Sep-2021	36	F		CA	MEDICARE	Non-Reactive	Outpatient	Clinic
1	0	1998	Sep-2021	25	F	White	DC	PRIVATE	Non-Reactive	Outpatient	Clinic
1	0	1975	Sep-2021	48	F	Other	DC	PRIVATE	Non-Reactive	Outpatient	Clinic
1	0	1997	Sep-2021	26	F	Multiple	DC	PRIVATE	Non-Reactive	Outpatient	Clinic
1	0	1983	Sep-2021	40	M	Asian	MD	PRIVATE	Non-Reactive	Outpatient	Clinic
					M	African American	MD	PRIVATE	Non-Reactive		Client
1	0	1976	Sep-2021	47	M	American Indian or Alaska Native	MD		Non-Reactive	Outpatient	Clinic
1	0	1994	Sep-2021	29	F	White	MD	PRIVATE	Non-Reactive	Outpatient	Clinic
					F	Unknown	VA					1	Negative	Jul-2020	Clinic
1	0	2003	Sep-2021	20	F	Other	MD	MEDICAID	Non-Reactive	Outpatient	Clinic
1	0	1990	Sep-2021	33	F	White	FL	PRIVATE	Non-Reactive	Outpatient	Clinic
1	0	1993	Sep-2021	30	F	White	DC	PRIVATE	Non-Reactive	Outpatient	Clinic
1	0	1993	Sep-2021	30	F	White	MD		Non-Reactive	Outpatient	Clinic
1	0	2002	Sep-2021	21	M	African American	MD		Non-Reactive	Outpatient	Clinic
1	0	1971	Sep-2021	52	F	White	MD	MEDICAID	Non-Reactive	Outpatient	Clinic
1	0	1966	Sep-2021	57	F	White	MD		Non-Reactive	Outpatient	Clinic
1	0	1981	Sep-2021	42	F	African American	MD	MEDICAID	Non-Reactive	Outpatient	Clinic
1	0	2002	Sep-2021	21	F	African American	MD	PRIVATE	Non-Reactive	Outpatient	Clinic
1	0	1970	Sep-2021	53	F	African American	MD	PRIVATE	Non-Reactive	Outpatient	Clinic
1	0	1974	Sep-2021	49	F	White	MD	PRIVATE	Non-Reactive	Outpatient	Clinic
0	1	1958	Sep-2021	65	F	White	MD	PRIVATE	Non-Reactive	Outpatient	Clinic
1	0	1937	Sep-2021	86	F	White	MD	MEDICARE	Non-Reactive	Outpatient	Clinic
1	0	1984	Sep-2021	39	F	African American	MD	PRIVATE	Non-Reactive	Outpatient	Clinic
0	1	1962	Sep-2021	61	F	African American	MD	MEDICARE	Non-Reactive	Outpatient	Clinic
1	0	1983	Sep-2021	40	F	African American	MD	MEDICAID	Non-Reactive	Outpatient	Clinic
0	1	1952	Sep-2021	71	M	African American	MD	PRIVATE	Non-Reactive	Outpatient	Clinic
1	0	1965	Sep-2021	58	M	White	MD	PRIVATE	Non-Reactive	Outpatient	Clinic
1	0	1981	Sep-2021	42	F	White	PA	PRIVATE	Non-Reactive	Outpatient	Clinic
1	0	1998	Sep-2021	25	F	African American	DC	PRIVATE	Non-Reactive	Outpatient	Clinic
1	0	1973	Sep-2021	50	F	Asian	DC	PRIVATE	Non-Reactive	Outpatient	Clinic
0	1	1951	Sep-2021	72	F	African American	MD	MEDICARE	Non-Reactive	Outpatient	Clinic
1	0	1938	Sep-2021	85	F	African American	MD	MEDICARE	Non-Reactive	Outpatient	Clinic
1	0	1970	Sep-2021	53	F	White	DC	PRIVATE	Non-Reactive	Outpatient	Clinic
0	1	1954	Sep-2021	69	F	Unknown	DC	PRIVATE	Non-Reactive	Outpatient	Clinic
1	0	1944	Sep-2021	79	M	White	VA	PRIVATE	Non-Reactive	Outpatient	Clinic
1	0	1972	Sep-2021	51	M	White	DC	MEDICAID	Non-Reactive	Outpatient	Clinic
1	0	1987	Sep-2021	36	F	Other	DC		Non-Reactive	Outpatient	Clinic
0	1	1957	Sep-2021	66	F	African American	DC	MEDICAID	Non-Reactive	Outpatient	Clinic
1	0	1969	Sep-2021	54	M	African American	DC		Non-Reactive	Outpatient	Clinic	1	Negative	Sep-2021	Clinic
1	0	1967	Sep-2021	56	M	African American	MD	MEDICARE	Non-Reactive	Outpatient	Clinic
					F	African American	MD	PRIVATE				1	Positive	Jul-2020	Clinic
0	1	1957	Sep-2021	66	F	African American	DC	PRIVATE	Reactive	Outpatient	Clinic	1	Negative	Sep-2021	Clinic
1	0	1943	Sep-2021	80	F	African American	MD	PRIVATE	Non-Reactive	Outpatient	Clinic
		1967		56	F	African American	DC	SELF PAY	Non-Reactive	Outpatient	Observation
1	0	1982	Sep-2021	41	F	African American	PA	PRIVATE	Non-Reactive	Outpatient	Clinic
1	0	1985	Sep-2021	38	F	African American	MD	PRIVATE	Non-Reactive	Outpatient	Clinic
0	1	1962	Sep-2021	61	F	Declined to Answer	MD	PRIVATE	Non-Reactive	Outpatient	Clinic
					F	African American	MD	PRIVATE				1	Negative	Jul-2020	Clinic
0	1	1962	Sep-2021	61	F	African American	MD	PRIVATE	Non-Reactive	Outpatient	Clinic
1	0	1983	Sep-2021	40	F	African American	DC	MEDICAID	Non-Reactive	Outpatient	Clinic
0	1	1948	Sep-2021	75	M	White	MD	MEDICARE	Non-Reactive	Outpatient	Clinic
1	0	1984	Sep-2021	39	M	African American	DC	PRIVATE	Non-Reactive	Outpatient	Clinic
0	1	1954	Sep-2021	69	M	African American	MD	MEDICARE	Non-Reactive	Outpatient	Clinic
1	0	1988	Sep-2021	35	F	White	DC	PRIVATE	Non-Reactive	Outpatient	Clinic
1	0	1983	Sep-2021	40	M	White	MD	MEDICAID	Non-Reactive	Outpatient	Clinic
0	1	1962	Sep-2021	61	M	African American	MD		Non-Reactive	Outpatient	Clinic
1	0	1999	Sep-2021	24	M	African American	MD		Non-Reactive	Outpatient	Clinic
					F	African American	DC	MEDICAID				1	Negative	Jul-2020	Clinic
1	0	1998	Sep-2021	25	M	African American	MD	MEDICAID	Non-Reactive	Outpatient	Clinic
					F	African American	DC	MEDICARE				1	Negative	Jul-2020	Clinic
1	0	1997	Sep-2021	26	F	African American	DC	MEDICAID	Non-Reactive	Outpatient	Clinic
1	0	1981	Sep-2021	42	F	White	MD	MEDICAID	Non-Reactive	Outpatient	Clinic
1	0	1992	Sep-2021	31	M	White	DC	PRIVATE	Non-Reactive	Outpatient	Clinic
					F	African American	MD	MEDICARE				1	Negative	Jul-2020	Clinic
1	0	1971	Sep-2021	52	F	White	MD	MEDICAID	Non-Reactive	Outpatient	Clinic
1	0	1980	Sep-2021	43	F	African American	MD	PRIVATE	Non-Reactive	Outpatient	Clinic
0	1	1961	Sep-2021	62	M	African American	MD	PRIVATE	Non-Reactive	Outpatient	Clinic
1	0	2001	Sep-2021	22	M	African American	MD		Non-Reactive	Outpatient	Clinic
1	0	1972	Sep-2021	51	F	African American	DC		Non-Reactive	Outpatient	Clinic
0	1	1961	Sep-2021	62	F	White	DC	PRIVATE	Non-Reactive	Outpatient	Clinic
1	0	1988	Sep-2021	35	F	African American	MD	MEDICAID	Non-Reactive	Outpatient	Clinic
1	0	1971	Sep-2021	52	F	African American	MD	PRIVATE	Non-Reactive	Outpatient	Clinic
1	0	1989	Sep-2021	34	F	African American	MD	MEDICAID	Non-Reactive	Outpatient	Clinic
					M	African American	MD	PRIVATE				1	Negative	Jul-2020	Clinic
1	0	1996	Sep-2021	27	F	African American	MD	PRIVATE	Non-Reactive	Outpatient	Clinic
1	0	1979	Sep-2021	44	F	White	MD	MEDICAID	Non-Reactive	Outpatient	Clinic
1	0	1965	Sep-2021	58	M	African American	MD	PRIVATE	Non-Reactive	Outpatient	Clinic
1	0	1988	Sep-2021	35	F	African American	MD	PRIVATE	Non-Reactive	Outpatient	Clinic
1	0	1989	Sep-2021	34	F	White	MD	SELF PAY	Non-Reactive	Outpatient	Clinic
0	1	1954	Sep-2021	69	M	White	MD	PRIVATE	Non-Reactive	Outpatient	Clinic
1	0	2011	Sep-2021	12	F	White	MD		Non-Reactive	Outpatient	Clinic
1	0	1995	Sep-2021	28	F	African American	MD	MEDICAID	Non-Reactive	Outpatient	Clinic
1	0	1978	Sep-2021	45	F	African American	MD	MEDICAID	Non-Reactive	Outpatient	Clinic
1	0	1997	Sep-2021	26	F	African American	MD	MEDICAID	Non-Reactive	Outpatient	Clinic
1	0	1978	Sep-2021	45	F	White	VA	PRIVATE	Non-Reactive	Outpatient	Clinic
1	0	1986	Sep-2021	37	F	African American	DC	PRIVATE	Non-Reactive	Outpatient	Clinic
1	0	1989	Sep-2021	34	F	African American	DC	PRIVATE	Non-Reactive	Outpatient	Clinic
0	1	1958	Sep-2021	65	M	African American	MD	PRIVATE	Non-Reactive	Outpatient	Clinic
1	0	1999	Sep-2021	24	F	African American	DC	PRIVATE	Non-Reactive	Outpatient	Clinic
1	0	1973	Sep-2021	50	M	White	MD	MEDICAID	Non-Reactive	Outpatient	Clinic
1	0	1986	Sep-2021	37	F	African American	MD	MEDICAID	Non-Reactive	Outpatient	Clinic
1	0	1980	Sep-2021	43	F	African American	DC		Non-Reactive	Outpatient	Clinic
1	0	1991	Sep-2021	32	F	Other	MD	MEDICAID	Non-Reactive	Outpatient	Clinic
0	1	1956	Sep-2021	67	M	African American	DC	MEDICARE	Non-Reactive	Outpatient	Clinic
1	0	1993	Sep-2021	30	F	White	MD	PRIVATE	Non-Reactive	Outpatient	Clinic
1	0	1970	Sep-2021	53	F	Other	MD	SELF PAY	Non-Reactive	Outpatient	Clinic
0	1	1948	Sep-2021	75	F	African American	DC		Non-Reactive	Outpatient	Clinic
0	1	1953	Sep-2021	70	M	White	MD		Non-Reactive	Outpatient	Clinic
1	0	1966	Sep-2021	57	M	White	MD	PRIVATE	Reactive	Outpatient	Clinic	1	Negative	Sep-2021	Clinic
1	0	1999	Sep-2021	24	F	African American	MD	MEDICAID	Non-Reactive	Outpatient	Clinic
1	0	1971	Sep-2021	52	F	African American	MD	MEDICAID	Non-Reactive	Outpatient	Clinic
					M	African American	DC	MEDICAID				1	Negative	Jul-2020	Clinic
					F	African American	MD	MEDICAID				1	Negative	Jul-2020	Clinic
					F	African American	MD	PRIVATE				1	Negative	Jul-2020	Clinic
1	0	1973	Sep-2021	50	M	African American	VA	PRIVATE	Non-Reactive	Outpatient	Clinic
1	0	1978	Sep-2021	45	M	White	MD	MEDICAID	Non-Reactive	Outpatient	Clinic
1	0	1943	Sep-2021	80	M	African American	MD	PRIVATE	Non-Reactive	Outpatient	Clinic
1	0	1984	Sep-2021	39	F	Other	MD	MEDICAID	Non-Reactive	Outpatient	Clinic
1	0	1966	Sep-2021	57	F	White	MD	PRIVATE	Non-Reactive	Outpatient	Clinic
0	1	1964	Sep-2021	59	M	African American	MD	PRIVATE	Non-Reactive	Outpatient	Clinic
1	0	1989	Sep-2021	34	F	African American	MD	MEDICAID	Non-Reactive	Outpatient	Clinic
1	0	1965	Sep-2021	58	F	Other	MD	MEDICAID	Non-Reactive	Outpatient	Clinic
1	0	1984	Sep-2021	39	F	Other	DC	PRIVATE	Non-Reactive	Outpatient	Clinic
1	0	1994	Sep-2021	29	F	African American	DC		Non-Reactive	Outpatient	Clinic
1	0	1986	Sep-2021	37	F	African American	MD	PRIVATE	Non-Reactive	Outpatient	Clinic
1	0	1980	Sep-2021	43	M	White	VA	PRIVATE	Non-Reactive	Outpatient	Clinic
1	0	1977	Sep-2021	46	M	White	DC	PRIVATE	Non-Reactive	Outpatient	Clinic
1	0	1999	Sep-2021	24	F	Multiple	MD	MEDICAID	Non-Reactive	Outpatient	Clinic
1	0	1973	Sep-2021	50	M	African American	MD	PRIVATE	Non-Reactive	Outpatient	Clinic
0	1	1949	Sep-2021	74	F	White	DC	PRIVATE	Non-Reactive	Outpatient	Clinic
1	0	1983	Sep-2021	40	F	White	VA	PRIVATE	Non-Reactive	Outpatient	Clinic
0	1	1952	Sep-2021	71	F	White	MD	PRIVATE	Non-Reactive	Outpatient	Clinic
1	0	1982	Sep-2021	41	F	White	MD	MEDICAID	Non-Reactive	Outpatient	Clinic
1	0	1987	Sep-2021	36	F	White	MD	PRIVATE	Non-Reactive	Outpatient	Clinic
1	0	1976	Sep-2021	47	M	African American	DC	PRIVATE	Non-Reactive	Outpatient	Clinic
					M	Other	DC					1	Negative	Jul-2020	Clinic
1	0	1965	Sep-2021	58	M	Other	MD	PRIVATE	Non-Reactive	Outpatient	Clinic
1	0	1969	Sep-2021	54	M	White	DC	PRIVATE	Non-Reactive	Outpatient	Clinic
1	0	1970	Sep-2021	53	M	White	MD	PRIVATE	Non-Reactive	Outpatient	Clinic
1	0	1988	Sep-2021	35	M	White	MD	PRIVATE	Non-Reactive	Outpatient	Clinic
0	1	1958	Sep-2021	65	F	White	MD	PRIVATE	Non-Reactive	Outpatient	Clinic
1	0	1982	Sep-2021	41	F	African American	MD	PRIVATE	Non-Reactive	Outpatient	Clinic
					F	African American	MD	MEDICARE				1	Negative	Jul-2020	Clinic
1	0	1978	Sep-2021	45	M	White	MD	PRIVATE	Non-Reactive	Outpatient	Clinic
1	0	1998	Sep-2021	25	F	White	MD		Non-Reactive	Outpatient	Clinic
0	1	1962	Sep-2021	61	M	White	MD	PRIVATE	Non-Reactive	Outpatient	Clinic
1	0	1998	Sep-2021	25	F	African American	MD	MEDICAID	Non-Reactive	Outpatient	Clinic
1	0	1984	Sep-2021	39	F	White	DC		Non-Reactive	Outpatient	Clinic
1	0	1965	Sep-2021	58	M	Other	MD	PRIVATE	Non-Reactive	Outpatient	Clinic
1	0	1978	Sep-2021	45	F	Asian	MD	PRIVATE	Non-Reactive	Outpatient	Clinic
1	0	2000	Sep-2021	23	M	White	MD		Non-Reactive	Outpatient	Clinic
1	0	1987	Sep-2021	36	F	African American	DC	PRIVATE	Non-Reactive	Outpatient	Clinic
1	0	1968	Sep-2021	55	F	African American	VA	PRIVATE	Non-Reactive	Outpatient	Clinic
1	0	1969	Sep-2021	54	M	African American	MD	PRIVATE	Non-Reactive	Outpatient	Clinic
1	0	1992	Sep-2021	31	F	White	MD	PRIVATE	Non-Reactive	Outpatient	Clinic
1	0	1982	Sep-2021	41	M	White	DC	PRIVATE	Non-Reactive	Outpatient	Clinic
1	0	1989	Sep-2021	34	F	White	MD	PRIVATE	Non-Reactive	Outpatient	Clinic
1	0	1998	Sep-2021	25	F	White	MD		Non-Reactive	Outpatient	Clinic
					F	African American	MD	PRIVATE				1	Positive	Jul-2020	Clinic
0	1	1959	Sep-2021	64	F	Declined to Answer	MD	PRIVATE	Non-Reactive	Outpatient	Clinic
1	0	2002	Sep-2021	21	M	Asian	MD	MEDICAID	Non-Reactive	Outpatient	Clinic
					F	African American	MD	MEDICARE				1	Positive	Jul-2020	Clinic
					M	African American	DC	MEDICARE				1	Negative	Jul-2020	Clinic
					M	African American	DC	MEDICARE				1	Negative	Jul-2020	Clinic
1	0	1991	Sep-2021	32	F	Other	MD	PRIVATE	Non-Reactive	Outpatient	Clinic
1	0	1980	Sep-2021	43	M	Asian	MD	PRIVATE	Non-Reactive	Outpatient	Clinic
1	0	1975	Sep-2021	48	M	Other	MD	PRIVATE	Non-Reactive	Outpatient	Clinic
1	0	1991	Sep-2021	32	M	African American	DC	PRIVATE	Non-Reactive	Outpatient	Clinic
1	0	1993	Sep-2021	30	F	African American	MD	MEDICAID	Non-Reactive	Outpatient	Clinic
0	1	1963	Sep-2021	60	M	African American	MD	MEDICAID	Reactive	Outpatient	Clinic	1	Negative	Sep-2021	Clinic
					F	African American	DC	MEDICARE				1	Negative	Jul-2020	Clinic
1	0	1970	Sep-2021	53	M	Unknown	MD	PRIVATE	Non-Reactive	Outpatient	Clinic
0	1	1947	Sep-2021	76	F	Unknown	MD	MEDICARE	Non-Reactive	Outpatient	Clinic
1	0	1974	Sep-2021	49	M	Other	DC	PRIVATE	Non-Reactive	Outpatient	Clinic
1	0	2002	Sep-2021	21	F	White	MD	MEDICAID	Non-Reactive	Outpatient	Clinic
1	0	1985	Sep-2021	38	F	White	MD	PRIVATE	Non-Reactive	Outpatient	Clinic
1	0	1970	Sep-2021	53	F	Unknown	MD	PRIVATE	Non-Reactive	Outpatient	Clinic
1	0	1983	Sep-2021	40	M	African American	MD	PRIVATE	Non-Reactive	Outpatient	Clinic
1	0	1973	Sep-2021	50	F	White	DC	PRIVATE	Non-Reactive	Outpatient	Clinic
0	1	1956	Sep-2021	67	F	White	MD	PRIVATE	Non-Reactive	Outpatient	Clinic
1	0	1992	Sep-2021	31	F	White	MD	PRIVATE	Non-Reactive	Outpatient	Clinic
1	0	1990	Sep-2021	33	M	African American	MD	PRIVATE	Non-Reactive	Outpatient	Clinic
					F	African American	DC					1	Negative	Jul-2020	Clinic
1	0	1999	Sep-2021	24	M	White	MD		Non-Reactive	Outpatient	Clinic
1	0	1997	Sep-2021	26	F	African American	MD	PRIVATE	Non-Reactive	Outpatient	Clinic
					F	African American	DC	MEDICARE				1	Negative	Jul-2020	Clinic
1	0	1998	Sep-2021	25	F	African American	MD		Non-Reactive	Outpatient	Clinic
					F	African American	DC	MEDICARE				1	Negative	Jul-2020	Clinic
1	0	1999	Sep-2021	24	F	White	MD	PRIVATE	Non-Reactive	Outpatient	Clinic
0	1	1964	Sep-2021	59	M	African American	MD	MEDICAID	Non-Reactive	Outpatient	Clinic
					M	African American	DC	PRIVATE	Non-Reactive		Outpatient Message
1	0	1974	Sep-2021	49	M	African American	MD	PRIVATE	Non-Reactive	Outpatient	Clinic
1	0	1988	Sep-2021	35	F	Other	VA	PRIVATE	Non-Reactive	Outpatient	Clinic
1	0	1993	Sep-2021	30	F	African American	DC	PRIVATE	Non-Reactive	Outpatient	Clinic
					F	African American	DC	MEDICARE				1	Negative	Jul-2020	Clinic
1	0	1985	Sep-2021	38	F	Asian	DC	PRIVATE	Non-Reactive	Outpatient	Clinic
1	0	1991	Sep-2021	32	F	African American	VA	PRIVATE	Non-Reactive	Outpatient	Clinic
1	0	1982	Sep-2021	41	F	African American	DC	PRIVATE	Non-Reactive	Outpatient	Clinic
0	1	1959	Sep-2021	64	F	African American	MD	PRIVATE	Non-Reactive	Outpatient	Clinic
0	1	1957	Sep-2021	66	M	White	MD	SELF PAY	Non-Reactive	Outpatient	Clinic
1	0	1981	Sep-2021	42	M	White	MD	PRIVATE	Non-Reactive	Outpatient	Clinic	1	Negative	Sep-2021	Clinic
1	0	1996	Sep-2021	27	F	White	DC	PRIVATE	Non-Reactive	Outpatient	Clinic
1	0	2003	Sep-2021	20	F	African American	MD	MEDICAID	Non-Reactive	Outpatient	Clinic
1	0	1993	Sep-2021	30	F	African American	DC		Non-Reactive	Outpatient	Clinic
1	0	1974	Sep-2021	49	M	White	MD	PRIVATE	Non-Reactive	Outpatient	Clinic
1	0	1993	Sep-2021	30	F	African American	MD	MEDICAID	Non-Reactive	Outpatient	Clinic
1	0	1979	Sep-2021	44	F	White	DC	PRIVATE	Non-Reactive	Outpatient	Clinic
1	0	1996	Sep-2021	27	F	African American	MD	MEDICAID	Non-Reactive	Outpatient	Clinic
1	0	1971	Sep-2021	52	M	White	FL	PRIVATE	Non-Reactive	Outpatient	Clinic
1	0	1997	Sep-2021	26	F	White	VA	PRIVATE	Non-Reactive	Outpatient	Clinic
1	0	1987	Sep-2021	36	F	African American	MD	PRIVATE	Non-Reactive	Outpatient	Clinic
1	0	1942	Sep-2021	81	M	Other	MD	MEDICARE	Non-Reactive	Outpatient	Clinic
					F	African American	DC	MEDICARE	Non-Reactive		Client
0	1	1951	Sep-2021	72	M	White	VA		Non-Reactive	Outpatient	Clinic	1	Negative	Sep-2021	Clinic
1	0	1979	Sep-2021	44	F	Unknown	DC	PRIVATE	Non-Reactive	Outpatient	Clinic
					F	African American	DC	MEDICARE				1	Negative	Jul-2020	Clinic
1	0	1969	Sep-2021	54	F	Declined to Answer	DC	MEDICARE	Non-Reactive	Outpatient	Clinic
1	0	1983	Sep-2021	40	M	White	VA	PRIVATE	Non-Reactive	Outpatient	Clinic
1	0	1976	Sep-2021	47	F	White	VA	PRIVATE	Non-Reactive	Outpatient	Clinic
					F	African American	DC					1	Negative	Jul-2020	Clinic
1	0	1989	Sep-2021	34	F	White	MD	PRIVATE	Non-Reactive	Outpatient	Clinic
1	0	1990	Sep-2021	33	F	African American	DC	PRIVATE	Non-Reactive	Outpatient	Clinic
0	1	1952	Sep-2021	71	F	Unknown	MD	PRIVATE	Non-Reactive	Outpatient	Clinic
1	0	2002	Sep-2021	21	F	White	MD	PRIVATE	Non-Reactive	Outpatient	Clinic
1	0	1989	Sep-2021	34	M	Unknown	DC	PRIVATE	Non-Reactive	Outpatient	Clinic
					M	African American	MD	MEDICARE				1	Negative	Jul-2020	Clinic
1	0	1945	Sep-2021	78	F	White	MD	MEDICARE	Non-Reactive	Outpatient	Clinic
1	0	1974	Sep-2021	49	M	African American	MD	PRIVATE	Non-Reactive	Outpatient	Clinic
1	0	1967	Sep-2021	56	M	White	FL		Non-Reactive	Outpatient	Clinic	1	Negative	Sep-2021	Clinic
0	1	1959	Sep-2021	64	F	White	MD		Non-Reactive	Outpatient	Clinic
0	1	1963	Sep-2021	60	M	White	VA	MEDICARE	Non-Reactive	Outpatient	Clinic	1	Negative	Sep-2021	Clinic
1	0	1975	Sep-2021	48	F	White	DC	Government	Non-Reactive	Outpatient	Clinic
1	0	1996	Sep-2021	27	F	African American	MD		Non-Reactive	Outpatient	Clinic
1	0	1937	Sep-2021	86	M	White	MD	MEDICARE	Non-Reactive	Outpatient	Clinic
0	1	1947	Sep-2021	76	F	Unknown	MD	MEDICARE	Non-Reactive	Outpatient	Clinic
1	0	1986	Sep-2021	37	M	African American	DC	PRIVATE	Non-Reactive	Outpatient	Clinic
0	1	1951	Sep-2021	72	M	White	MD	MEDICARE	Non-Reactive	Outpatient	Clinic
1	0	1972	Sep-2021	51	F	African American	MD	PRIVATE	Non-Reactive	Outpatient	Clinic
1	0	1974	Sep-2021	49	M	White	DC		Non-Reactive	Outpatient	Clinic
1	0	1985	Sep-2021	38	M	African American	MD	PRIVATE	Non-Reactive	Outpatient	Clinic
1	0	1977	Sep-2021	46	F	Unknown	MD	PRIVATE	Non-Reactive	Outpatient	Clinic
					F	African American	DC	PRIVATE				1	Negative	Jul-2020	Clinic
1	0	1977	Sep-2021	46	M	Unknown	DC	PRIVATE	Non-Reactive	Outpatient	Clinic
1	0	2001	Sep-2021	22	F	Other	MD	PRIVATE	Non-Reactive	Outpatient	Clinic
1	0	1943	Sep-2021	80	M	White	MD	MEDICARE	Non-Reactive	Outpatient	Clinic
1	0	1997	Sep-2021	26	F	African American	MD		Non-Reactive	Outpatient	Clinic
1	0	1978	Sep-2021	45	F	Unknown	DC	PRIVATE	Non-Reactive	Outpatient	Clinic
1	0	1998	Sep-2021	25	F	White	DC		Non-Reactive	Outpatient	Clinic
0	1	1962	Sep-2021	61	M	African American	MD		Non-Reactive	Outpatient	Clinic	1	Negative	Sep-2021	Clinic
1	0	1983	Sep-2021	40	F	Unknown	MD		Non-Reactive	Outpatient	Clinic
1	0	1969	Sep-2021	54	F	African American	MD	PRIVATE	Non-Reactive	Outpatient	Clinic
					F	African American	DC	MEDICARE				1	Negative	Jul-2020	Clinic
1	0	1982	Sep-2021	41	F	Unknown	DC		Non-Reactive	Outpatient	Clinic
1	0	1985	Sep-2021	38	M	White	MD	PRIVATE	Non-Reactive	Outpatient	Clinic
1	0	1994	Sep-2021	29	M	White	MD	PRIVATE	Non-Reactive	Outpatient	Clinic
1	0	1985	Sep-2021	38	M	Other	MD	SELF PAY	Non-Reactive	Outpatient	Clinic
1	0	1991	Sep-2021	32	F	White	MD	PRIVATE	Non-Reactive	Outpatient	Clinic
1	0	1984	Sep-2021	39	F	Asian	DC		Non-Reactive	Outpatient	Clinic
1	0	1978	Sep-2021	45	M	Unknown	MD	PRIVATE	Non-Reactive	Outpatient	Clinic
1	0	1998	Sep-2021	25	F	White	MD		Non-Reactive	Outpatient	Clinic
0	1	1951	Sep-2021	72	F	White	MD	PRIVATE	Non-Reactive	Outpatient	Clinic
1	0	1998	Sep-2021	25	F	White	DC	PRIVATE	Non-Reactive	Outpatient	Clinic
1	0	1981	Sep-2021	42	F	White	WV		Non-Reactive	Outpatient	Clinic
1	0	1988	Sep-2021	35	F	Unknown	DC		Non-Reactive	Outpatient	Clinic
1	0	1989	Sep-2021	34	M		VA	PRIVATE	Non-Reactive	Outpatient	Clinic
0	1	1962	Sep-2021	61	M	Other	MD	PRIVATE	Non-Reactive	Outpatient	Clinic
0	1	1947	Sep-2021	76	M	White	MD	MEDICARE	Non-Reactive	Outpatient	Clinic
1	0	1976	Sep-2021	47	M	White	MD	PRIVATE	Non-Reactive	Outpatient	Clinic
1	0	1991	Sep-2021	32	M	White	MD	PRIVATE	Non-Reactive	Outpatient	Clinic
0	1	1962	Sep-2021	61	F	White	MD	PRIVATE	Non-Reactive	Outpatient	Clinic
					F	African American	MD	MEDICAID				1	Negative	Jul-2020	Clinic
1	0	1977	Sep-2021	46	M	African American	MD	MEDICAID	Non-Reactive	Outpatient	Clinic
1	0	1991	Sep-2021	32	F	African American	MD	MEDICAID	Non-Reactive	Outpatient	Clinic
0	1	1954	Sep-2021	69	M	White	MD	MEDICARE	Non-Reactive	Outpatient	Clinic
1	0	1984	Sep-2021	39	F	African American	PA	PRIVATE	Non-Reactive	Outpatient	Clinic
1	0	1976	Sep-2021	47	F	African American	MD	PRIVATE	Non-Reactive	Outpatient	Clinic
1	0	1980	Sep-2021	43	F	African American	MD	MEDICAID	Non-Reactive	Outpatient	Clinic
					M	Other	MD	MEDICARE				1	Negative	Jul-2020	Observation
1	0	1971	Sep-2021	52	F	African American	DC	MEDICARE	Non-Reactive	Outpatient	Clinic
1	0	1970	Sep-2021	53	F	White	MD	PRIVATE	Non-Reactive	Outpatient	Clinic
0	1	1964	Sep-2021	59	F	African American	MD	PRIVATE	Non-Reactive	Outpatient	Clinic
0	1	1954	Sep-2021	69	F	White	MD	PRIVATE	Non-Reactive	Outpatient	Clinic
1	0	1987	Sep-2021	36	M	White	MD	PRIVATE	Non-Reactive	Outpatient	Clinic
0	1	1958	Sep-2021	65	M	Declined to Answer	MD	PRIVATE	Non-Reactive	Outpatient	Clinic
1	0	1943	Sep-2021	80	F	Asian	DC	MEDICARE	Non-Reactive	Outpatient	Clinic
1	0	1965	Sep-2021	58	F	White	VA	PRIVATE	Non-Reactive	Outpatient	Clinic
0	1	1948	Sep-2021	75	F	African American	DC	MEDICARE	Non-Reactive	Outpatient	Clinic
0	1	1949	Sep-2021	74	F	African American	MD	PRIVATE	Non-Reactive	Outpatient	Clinic
1	0	1975	Sep-2021	48	M	African American	MD	PRIVATE	Non-Reactive	Outpatient	Clinic
1	0	1966	Sep-2021	57	F	African American	DC		Non-Reactive	Outpatient	Clinic
1	0	1935	Sep-2021	88	M	White	MD	MEDICARE	Non-Reactive	Outpatient	Clinic
					M	African American	MD	MEDICARE				1	Negative	Jul-2020	Clinic
1	0	1939	Sep-2021	84	F	White	MD	MEDICARE	Non-Reactive	Outpatient	Clinic
0	1	1961	Sep-2021	62	F	White	MD	PRIVATE	Non-Reactive	Outpatient	Clinic
1	0	1945	Sep-2021	78	F	African American	DC	PRIVATE	Non-Reactive	Outpatient	Clinic
1	0	1970	Sep-2021	53	F	White	MD	MEDICARE	Non-Reactive	Outpatient	Clinic
0	1	1958	Sep-2021	65	M	African American	MD	MEDICAID	Non-Reactive	Outpatient	Clinic
0	1	1959	Sep-2021	64	M	African American	DC	SELF PAY	Non-Reactive	Outpatient	Clinic
1	0	1970	Sep-2021	53	M	White	VA	PRIVATE	Non-Reactive	Outpatient	Clinic
1	0	1970	Sep-2021	53	M	African American	MD	MEDICAID	Non-Reactive	Outpatient	Clinic
					M	African American	MD	PRIVATE				1	Negative	Jul-2020	Clinic
0	1	1964	Sep-2021	59	F	White	DC	PRIVATE	Non-Reactive	Outpatient	Clinic
1	0	1979	Sep-2021	44	F	African American	MD	PRIVATE	Non-Reactive	Outpatient	Clinic
1	0	1970	Sep-2021	53	F	White	DC	PRIVATE	Non-Reactive	Outpatient	Clinic
1	0	1974	Sep-2021	49	F	White	MD	PRIVATE	Non-Reactive	Outpatient	Clinic
1	0	1981	Sep-2021	42	M	African American	MD	PRIVATE	Non-Reactive	Outpatient	Clinic
1	0	1993	Sep-2021	30	F	African American	MD	PRIVATE	Non-Reactive	Outpatient	Clinic
					M	White	MD	MEDICAID				1	Negative	Jul-2020	Clinic
1	0	1938	Sep-2021	85	F	African American	MD	MEDICARE	Non-Reactive	Outpatient	Clinic
0	1	1952	Sep-2021	71	F	White	MD	MEDICARE	Non-Reactive	Outpatient	Clinic
1	0	1991	Sep-2021	32	M	White	MD	PRIVATE	Non-Reactive	Outpatient	Clinic
1	0	1979	Sep-2021	44	F	African American	MD	PRIVATE	Non-Reactive	Outpatient	Clinic
					F	White	MD	MEDICAID				1	Negative	Jul-2020	Clinic
1	0	1983	Sep-2021	40	M	African American	MD	MEDICAID	Non-Reactive	Outpatient	Clinic
1	0	1974	Sep-2021	49	F	African American	MD	PRIVATE	Non-Reactive	Outpatient	Clinic
1	0	1971	Sep-2021	52	M	White	VA	PRIVATE	Non-Reactive	Outpatient	Clinic
1	0	1994	Sep-2021	29	F	White	DC	PRIVATE	Non-Reactive	Outpatient	Clinic
1	0	1989	Sep-2021	34	F	African American	MD	PRIVATE	Non-Reactive	Outpatient	Clinic
					M	White	MD	PRIVATE				1	Negative	Jul-2020	Clinic
1	0	1968	Sep-2021	55	F	African American	MD	PRIVATE	Non-Reactive	Outpatient	Clinic
1	0	2000	Sep-2021	23	F	African American	MD	MEDICAID	Non-Reactive	Outpatient	Clinic
1	0	1971	Sep-2021	52	M	African American	MD	MEDICAID	Non-Reactive	Outpatient	Clinic
0	1	1952	Sep-2021	71	F	African American	DC	PRIVATE	Non-Reactive	Outpatient	Clinic
1	0	1979	Sep-2021	44	F	African American	MD	PRIVATE	Non-Reactive	Outpatient	Clinic
1	0	1965	Sep-2021	58	F	White	DC	PRIVATE	Non-Reactive	Outpatient	Clinic
1	0	1981	Sep-2021	42	F	White	DC	PRIVATE	Non-Reactive	Outpatient	Clinic
					M	White	MD	MEDICAID				1	Positive	Jul-2020	Clinic
0	1	1964	Sep-2021	59	M	African American	DC		Non-Reactive	Outpatient	Clinic
0	1	1960	Sep-2021	63	F	Other	DC	PRIVATE	Non-Reactive	Outpatient	Clinic
1	0	1977	Sep-2021	46	M	Unknown	MD	PRIVATE	Non-Reactive	Outpatient	Clinic
1	0	1994	Sep-2021	29	F	African American	MD	PRIVATE	Non-Reactive	Outpatient	Clinic
1	0	1976	Sep-2021	47	M	African American	MD	PRIVATE	Non-Reactive	Outpatient	Clinic
0	1	1962	Sep-2021	61	F	White	DC		Non-Reactive	Outpatient	Clinic
0	1	1949	Sep-2021	74	M	White	MD	MEDICARE	Non-Reactive	Outpatient	Clinic
0	1	1949	Sep-2021	74	M	African American	MD	MEDICARE	Non-Reactive	Outpatient	Clinic
0	1	1948	Sep-2021	75	F	African American	MD	MEDICARE	Non-Reactive	Outpatient	Clinic
					F	White	MD	MEDICAID				1	Negative	Jul-2020	Clinic
1	0	1992	Sep-2021	31	F	White	MD	PRIVATE	Non-Reactive	Outpatient	Clinic
1	0	1986	Sep-2021	37	F	African American	MD	PRIVATE	Non-Reactive	Outpatient	Clinic
1	0	1981	Sep-2021	42	F	White	MD	PRIVATE	Non-Reactive	Outpatient	Clinic
1	0	1990	Sep-2021	33	F	White	MD	PRIVATE	Non-Reactive	Outpatient	Clinic
0	1	1962	Sep-2021	61	F	White	MD	PRIVATE	Non-Reactive	Outpatient	Clinic
					M	African American	DC	PRIVATE				1	Negative	Jul-2020	Clinic
0	1	1956	Sep-2021	67	M	African American	MD	MEDICARE	Non-Reactive	Outpatient	Clinic
0	1	1961	Sep-2021	62	M	Unknown	MD	PRIVATE	Non-Reactive	Outpatient	Clinic	1	Negative	Sep-2021	Clinic
0	1	1959	Sep-2021	64	F	White	MD	PRIVATE	Non-Reactive	Outpatient	Clinic
1	0	1987	Sep-2021	36	F	White	MD	PRIVATE	Non-Reactive	Outpatient	Clinic
0	1	1958	Sep-2021	65	F	White	MD	PRIVATE	Non-Reactive	Outpatient	Clinic
1	0	1998	Sep-2021	25	F	White	MD	PRIVATE	Non-Reactive	Outpatient	Clinic
1	0	1980	Sep-2021	43	F	African American	MD	PRIVATE	Non-Reactive	Outpatient	Clinic
0	1	1951	Sep-2021	72	M	African American	MD	PRIVATE	Non-Reactive	Outpatient	Clinic
1	0	1968	Sep-2021	55	F	White	MD	PRIVATE	Non-Reactive	Outpatient	Clinic
0	1	1949	Sep-2021	74	F	African American	MD	MEDICARE	Non-Reactive	Outpatient	Clinic
0	1	1960	Sep-2021	63	M	White	MD	PRIVATE	Non-Reactive	Outpatient	Clinic
1	0	2000	Sep-2021	23	F	Other	MD	PRIVATE	Non-Reactive	Outpatient	Clinic
1	0	1984	Sep-2021	39	F	African American	MD	PRIVATE	Non-Reactive	Outpatient	Clinic
1	0	1975	Sep-2021	48	M	African American	MD	MEDICAID	Non-Reactive	Outpatient	Clinic
1	0	1978	Sep-2021	45	F	White	MD	PRIVATE	Non-Reactive	Outpatient	Clinic
1	0	1971	Sep-2021	52	F	African American	MD	PRIVATE	Non-Reactive	Outpatient	Clinic
1	0	1966	Sep-2021	57	M	African American	MD	PRIVATE	Non-Reactive	Outpatient	Clinic
1	0	1983	Sep-2021	40	F	Other	DC	PRIVATE	Non-Reactive	Outpatient	Clinic
1	0	1997	Sep-2021	26	F	White	MD	PRIVATE	Non-Reactive	Outpatient	Clinic
1	0	1987	Sep-2021	36	M	Other	MD	PRIVATE	Non-Reactive	Outpatient	Clinic
1	0	1981	Sep-2021	42	F	African American	DC	PRIVATE	Non-Reactive	Outpatient	Clinic
1	0	1991	Sep-2021	32	F	White	DC	PRIVATE	Non-Reactive	Outpatient	Clinic
1	0	1972	Sep-2021	51	M	African American	MD	PRIVATE	Non-Reactive	Outpatient	Clinic
1	0	1969	Sep-2021	54	M	African American	MD	PRIVATE	Non-Reactive	Outpatient	Clinic
0	1	1961	Sep-2021	62	M	African American	MD	PRIVATE	Reactive	Outpatient	Clinic	1	Positive	Sep-2021	Clinic
1	0	1983	Sep-2021	40	F	White	MD		Non-Reactive	Outpatient	Clinic
0	1	1964	Sep-2021	59	F	African American	MD	PRIVATE	Indeterminate	Outpatient	Clinic
0	1	1956	Sep-2021	67	F	Unknown	MD	MEDICARE	Non-Reactive	Outpatient	Clinic
1	0	1996	Sep-2021	27	F	Other	MD	PRIVATE	Non-Reactive	Outpatient	Clinic
1	0	1999	Sep-2021	24	F	African American	MD		Non-Reactive	Outpatient	Clinic
1	0	1969	Sep-2021	54	M	African American	MD	PRIVATE	Non-Reactive	Outpatient	Clinic
1	0	1985	Sep-2021	38	F	African American	MD	PRIVATE	Non-Reactive	Outpatient	Clinic
1	0	1995	Sep-2021	28	F	White	MD	MEDICAID	Non-Reactive	Outpatient	Clinic
1	0	1998	Sep-2021	25	F	Asian	MD	MEDICAID	Non-Reactive	Outpatient	Clinic
1	0	1997	Sep-2021	26	F	African American	MD	SELF PAY	Non-Reactive	Outpatient	Clinic
1	0	1965	Sep-2021	58	F	African American	DC	PRIVATE	Non-Reactive	Outpatient	Clinic
1	0	1988	Sep-2021	35	F	White	DC	PRIVATE	Non-Reactive	Outpatient	Clinic
1	0	1985	Sep-2021	38	F	White	DC	PRIVATE	Non-Reactive	Outpatient	Clinic
1	0	1966	Sep-2021	57	F	White	VA	PRIVATE	Non-Reactive	Outpatient	Clinic
0	1	1956	Sep-2021	67	M	White	MD		Non-Reactive	Outpatient	Clinic
1	0	1977	Sep-2021	46	F	White	DC	PRIVATE	Non-Reactive	Outpatient	Clinic
1	0	1966	Sep-2021	57	M	African American	MD	PRIVATE	Non-Reactive	Outpatient	Clinic
1	0	1988	Sep-2021	35	F	Unknown	MD	PRIVATE	Non-Reactive	Outpatient	Clinic
1	0	1987	Sep-2021	36	F	African American	MD	PRIVATE	Non-Reactive	Outpatient	Clinic
1	0	1985	Sep-2021	38	F	African American	MD	MEDICAID	Non-Reactive	Outpatient	Clinic
1	0	1975	Sep-2021	48	F	Other	MD	PRIVATE	Non-Reactive	Outpatient	Clinic
1	0	1989	Sep-2021	34	F	White	MD	PRIVATE	Non-Reactive	Outpatient	Clinic
					F	African American	MD	MEDICAID				1	Positive	Jul-2020	Clinic
1	0	1970	Sep-2021	53	F	White	DC	PRIVATE	Non-Reactive	Outpatient	Clinic
1	0	1968	Sep-2021	55	F	White	MD	PRIVATE	Non-Reactive	Outpatient	Clinic
1	0	1999	Sep-2021	24	F	African American	MD		Non-Reactive	Outpatient	Clinic
					F	African American	DC	MEDICAID				1	Negative	Jul-2020	Clinic
					M	White	MD	MEDICARE				1	Negative	Jul-2020	Clinic
1	0	1985	Sep-2021	38	F	White	MD	PRIVATE	Non-Reactive	Outpatient	Clinic
1	0	1989	Sep-2021	34	F	White	DC	PRIVATE	Non-Reactive	Outpatient	Clinic
0	1	1957	Sep-2021	66	F	White	DC		Non-Reactive	Outpatient	Clinic
1	0	1977	Sep-2021	46	M	African American	MD	PRIVATE	Non-Reactive	Outpatient	Clinic
1	0	1990	Sep-2021	33	F	White	MD	PRIVATE	Non-Reactive	Outpatient	Clinic
1	0	1997	Sep-2021	26	F	African American	MD		Non-Reactive	Outpatient	Clinic
1	0	1929	Sep-2021	94	F	African American	VA	MEDICARE	Non-Reactive	Outpatient	Clinic	1	Negative	Sep-2021	Clinic
1	0	1994	Sep-2021	29	F	African American	DC	SELF PAY	Non-Reactive	Outpatient	Clinic
1	0	1988	Sep-2021	35	M	White	MD	PRIVATE	Non-Reactive	Outpatient	Clinic
1	0	1982	Sep-2021	41	F	Other	MD	PRIVATE	Non-Reactive	Outpatient	Clinic
1	0	1998	Sep-2021	25	F	African American	MD	PRIVATE	Non-Reactive	Outpatient	Clinic
					M	White	MD	MEDICAID				1	Negative	Jul-2020	Clinic
1	0	1989	Sep-2021	34	F	Other	MD	PRIVATE	Non-Reactive	Outpatient	Clinic
1	0	1983	Sep-2021	40	F	White	DC	PRIVATE	Non-Reactive	Outpatient	Clinic
1	0	1989	Sep-2021	34	M	African American	MD	PRIVATE	Non-Reactive	Outpatient	Clinic
1	0	1981	Sep-2021	42	M	African American	MD	SELF PAY	Non-Reactive	Outpatient	Clinic
0	1	1954	Sep-2021	69	F	African American	MD	MEDICARE	Non-Reactive	Outpatient	Clinic
					F	African American	DC	MEDICAID				1	Negative	Jul-2020	Clinic
1	0	1967	Sep-2021	56	F	African American	MD	PRIVATE	Non-Reactive	Outpatient	Clinic
1	0	1971	Sep-2021	52	M	Other	MD	MEDICAID	Non-Reactive	Outpatient	Clinic	1	Negative	Sep-2021	Clinic
1	0	1989	Sep-2021	34	F	Other	VA	PRIVATE	Non-Reactive	Outpatient	Clinic
0	1	1959	Sep-2021	64	F	Multiple	VA	PRIVATE	Non-Reactive	Outpatient	Clinic
1	0	1970	Sep-2021	53	F	Unknown	VA	PRIVATE	Non-Reactive	Outpatient	Clinic
1	0	1971	Sep-2021	52	F	White	MD	PRIVATE	Non-Reactive	Outpatient	Clinic
1	0	1996	Sep-2021	27	F	White	MD	PRIVATE	Non-Reactive	Outpatient	Clinic
1	0	1982	Sep-2021	41	F	African American	DC	PRIVATE	Non-Reactive	Outpatient	Clinic
					F	African American	MD	PRIVATE				1	Negative	Jul-2020	Clinic
1	0	1988	Sep-2021	35	F	White	MD	PRIVATE	Non-Reactive	Outpatient	Clinic
1	0	1983	Sep-2021	40	F	White	MD	PRIVATE	Non-Reactive	Outpatient	Clinic
1	0	1989	Sep-2021	34	F	White	MD		Non-Reactive	Outpatient	Clinic
1	0	1989	Sep-2021	34	F	African American	MD	PRIVATE	Non-Reactive	Outpatient	Clinic
0	1	1951	Sep-2021	72	F	African American	VA	MEDICARE	Non-Reactive	Outpatient	Clinic
1	0	2003	Sep-2021	20	F	African American	MD	MEDICAID	Non-Reactive	Outpatient	Clinic
					F	White	MD	PRIVATE				1	Negative	Jul-2020	Clinic
1	0	1990	Sep-2021	33	F	White	MD	PRIVATE	Non-Reactive	Outpatient	Clinic
1	0	1989	Sep-2021	34	M	White	MD	PRIVATE	Non-Reactive	Outpatient	Clinic
1	0	1977	Sep-2021	46	F	Unknown	VA	PRIVATE	Non-Reactive	Outpatient	Clinic
					F	White	VA	MEDICARE				1	Negative	Jul-2020	Clinic
1	0	1995	Sep-2021	28	F	Unknown	MD	PRIVATE	Non-Reactive	Outpatient	Clinic
1	0	1992	Sep-2021	31	F	White	MD	PRIVATE	Non-Reactive	Outpatient	Clinic
1	0	1990	Sep-2021	33	F	White	DC	PRIVATE	Non-Reactive	Outpatient	Clinic
					F	African American	DC	MEDICAID				1	Negative	Jul-2020	Clinic
1	0	1987	Sep-2021	36	M	White	MD		Non-Reactive	Outpatient	Clinic
1	0	2001	Sep-2021	22	M	White	LA	SELF PAY	Non-Reactive	Outpatient	Clinic
1	0	1965	Sep-2021	58	F	African American	MD		Non-Reactive	Outpatient	Clinic	1	Negative	Sep-2021	Clinic
1	0	1970	Sep-2021	53	F	Other	DC	PRIVATE	Non-Reactive	Outpatient	Clinic
1	0	1983	Sep-2021	40	F	White	DC	PRIVATE	Non-Reactive	Outpatient	Clinic
					F	White	VA	PRIVATE				1	Negative	Jul-2020	Clinic
					M	White	VA					1	Positive	Jul-2020	Clinic
0	1	1964	Sep-2021	59	M	White	MD	PRIVATE	Non-Reactive	Outpatient	Clinic
1	0	1970	Sep-2021	53	M	Other	MD	PRIVATE	Non-Reactive	Outpatient	Clinic
1	0	1974	Sep-2021	49	F	White	MD	PRIVATE	Non-Reactive	Outpatient	Clinic
1	0	1994	Sep-2021	29	F	White	MD	PRIVATE	Non-Reactive	Outpatient	Clinic
1	0	1942	Sep-2021	81	F	White	MD	MEDICARE	Non-Reactive	Outpatient	Clinic
0	1	1953	Sep-2021	70	M	White	MD	MEDICARE	Non-Reactive	Outpatient	Clinic
1	0	1994	Sep-2021	29	M	White	DC	PRIVATE	Non-Reactive	Outpatient	Clinic
1	0	1984	Sep-2021	39	M	White	MD	PRIVATE	Non-Reactive	Outpatient	Clinic
1	0	1985	Sep-2021	38	M	African American	MD	MEDICAID	Non-Reactive	Outpatient	Clinic
1	0	1996	Sep-2021	27	F	White	MD		Non-Reactive	Outpatient	Clinic	1	Negative	Sep-2021	Clinic
1	0	1984	Sep-2021	39	F	African American	MD	PRIVATE	Non-Reactive	Outpatient	Clinic
1	0	1970	Sep-2021	53	M	White	DC		Non-Reactive	Outpatient	Clinic
1	0	1985	Sep-2021	38	F	Other	DC	MEDICAID	Non-Reactive	Outpatient	Clinic
1	0	1983	Sep-2021	40	F	African American	MD	MEDICAID	Non-Reactive	Outpatient	Clinic
1	0	1987	Sep-2021	36	F	African American	MD	PRIVATE	Non-Reactive	Outpatient	Clinic
1	0	1990	Sep-2021	33	M	African American	MD	PRIVATE	Non-Reactive	Outpatient	Clinic
1	0	1967	Sep-2021	56	M	African American	MD	MEDICAID	Non-Reactive	Outpatient	Clinic
1	0	1969	Sep-2021	54	F	Unknown	VA	PRIVATE	Non-Reactive	Outpatient	Clinic
					F	White	MD	MEDICARE				1	Negative	Jul-2020	Clinic
0	1	1959	Sep-2021	64	F	White	DC	PRIVATE	Non-Reactive	Outpatient	Clinic
1	0	1986	Sep-2021	37	F	White	MD	PRIVATE	Non-Reactive	Outpatient	Clinic
1	0	1982	Sep-2021	41	M	Other	VA	PRIVATE	Non-Reactive	Outpatient	Clinic
1	0	1977	Sep-2021	46	F	Other	VA		Non-Reactive	Outpatient	Clinic	1	Negative	Sep-2021	Clinic
1	0	1985	Sep-2021	38	F	White	MD		Non-Reactive	Outpatient	Clinic
1	0	1990	Sep-2021	33	F	African American	DC	MEDICAID	Non-Reactive	Outpatient	Clinic
					F	White	MD	MEDICAID				1	Positive	Jul-2020	Clinic
1	0	1997	Sep-2021	26	M	Unknown	MD	MEDICAID	Non-Reactive	Outpatient	Clinic
1	0	1980	Sep-2021	43	F		MD	PRIVATE	Non-Reactive	Outpatient	Clinic
1	0	1989	Sep-2021	34	F	Unknown	MD	PRIVATE	Non-Reactive	Outpatient	Clinic
1	0	1977	Sep-2021	46	M	White	MD	Government	Non-Reactive	Outpatient	Clinic
0	1	1956	Sep-2021	67	M	Other	NJ	PRIVATE	Reactive	Outpatient	Clinic	1	Negative	Sep-2021	Clinic
1	0	1995	Sep-2021	28	M	White	MD	PRIVATE	Non-Reactive	Outpatient	Clinic
					F	African American	DC	PRIVATE				1	Negative	Jul-2020	Clinic
0	1	1964	Sep-2021	59	F	Asian	MD	PRIVATE	Non-Reactive	Outpatient	Clinic
1	0	1983	Sep-2021	40	F	African American	DC	MEDICAID	Non-Reactive	Outpatient	Clinic
1	0	1990	Sep-2021	33	M	White	DC	PRIVATE	Non-Reactive	Outpatient	Clinic
1	0	1989	Sep-2021	34	F	African American	DC		Non-Reactive	Outpatient	Clinic
1	0	1980	Sep-2021	43	F	Unknown	DC	PRIVATE	Non-Reactive	Outpatient	Clinic
1	0	1991	Sep-2021	32	M	Other	MD	MEDICAID	Non-Reactive	Outpatient	Clinic
1	0	1992	Sep-2021	31	M	Unknown	MD	PRIVATE	Non-Reactive	Outpatient	Clinic
1	0	1990	Sep-2021	33	F	White	VA		Non-Reactive	Outpatient	Clinic
0	1	1964	Sep-2021	59	F	Asian	PA	PRIVATE	Non-Reactive	Outpatient	Outpatient
0	1	1954	Sep-2021	69	F	African American	MD	PRIVATE	Non-Reactive	Outpatient	Clinic
1	0	1992	Sep-2021	31	F	Unknown	DC	SELF PAY	Non-Reactive	Outpatient	Outpatient
					M	African American	MD	MEDICARE				1	Negative	Jul-2020	Clinic
					M	African American	MD	MEDICAID				1	Negative	Jul-2020	Clinic
0	1	1964	Sep-2021	59	F	White	MD	PRIVATE	Non-Reactive	Outpatient	Clinic
1	0	1981	Sep-2021	42	F	African American	MD	PRIVATE	Non-Reactive	Outpatient	Clinic
1	0	1975	Sep-2021	48	F	African American	MD	PRIVATE	Non-Reactive	Outpatient	Clinic
1	0	1944	Sep-2021	79	F	White	MD	MEDICARE	Non-Reactive	Outpatient	Clinic
1	0	1974	Sep-2021	49	F	African American	DC	MEDICAID	Non-Reactive	Outpatient	Clinic
1	0	1994	Sep-2021	29	F	African American	DC		Non-Reactive	Outpatient	Clinic
1	0	1966	Sep-2021	57	F	White	MD	PRIVATE	Non-Reactive	Outpatient	Clinic
1	0	1967	Sep-2021	56	F	White	DC	PRIVATE	Non-Reactive	Outpatient	Clinic
1	0	1993	Sep-2021	30	F	African American	MD	MEDICAID	Non-Reactive	Outpatient	Clinic
1	0	1982	Sep-2021	41	M	White	VA	PRIVATE	Non-Reactive	Outpatient	Clinic
0	1	1963	Sep-2021	60	F	African American	MD	PRIVATE	Non-Reactive	Outpatient	Clinic
1	0	2003	Sep-2021	20	F	White	MD	MEDICAID	Non-Reactive	Outpatient	Clinic
1	0	1985	Sep-2021	38	F	Other	MD	MEDICAID	Non-Reactive	Outpatient	Clinic
1	0	1985	Sep-2021	38	F	Other	MD	PRIVATE	Non-Reactive	Outpatient	Clinic
1	0	1994	Sep-2021	29	F	White	DC	PRIVATE	Non-Reactive	Outpatient	Clinic
1	0	1973	Sep-2021	50	M	Other	MD	PRIVATE	Non-Reactive	Outpatient	Clinic
1	0	1998	Sep-2021	25	M	African American	MD	PRIVATE	Non-Reactive	Outpatient	Clinic
					F	African American	MD	MEDICAID				1	Negative	Jul-2020	Clinic
1	0	1989	Sep-2021	34	F	Unknown	VA		Non-Reactive	Outpatient	Clinic
0	1	1959	Sep-2021	64	F		MD	PRIVATE	Non-Reactive	Outpatient	Clinic
1	0	1968	Sep-2021	55	M	White	MD		Non-Reactive	Outpatient	Clinic	1	Negative	Sep-2021	Clinic
1	0	1999	Sep-2021	24	F	Other	DC		Non-Reactive	Outpatient	Clinic
1	0	2009	Sep-2021	14	M		DC		Non-Reactive	Outpatient	Clinic
1	0	1968	Sep-2021	55	F	White	MD	MEDICARE	Non-Reactive	Outpatient	Clinic
					M	White	MD	MEDICAID				1	Positive	Jul-2020	Clinic
1	0	1983	Sep-2021	40	F	White	MD		Non-Reactive	Outpatient	Clinic
0	1	1951	Sep-2021	72	F	White	MD	MEDICARE	Non-Reactive	Outpatient	Clinic
1	0	2006	Sep-2021	17	F	White	MD	MEDICAID	Non-Reactive	Outpatient	Clinic
1	0	1987	Sep-2021	36	F	White	MD	MEDICAID	Non-Reactive	Outpatient	Clinic
1	0	1984	Sep-2021	39	F	White	MD	MEDICAID	Non-Reactive	Outpatient	Clinic
1	0	1941	Sep-2021	82	F	White	MD	MEDICARE	Non-Reactive	Outpatient	Clinic
0	1	1949	Sep-2021	74	F	African American	MD	MEDICARE	Non-Reactive	Outpatient	Clinic
1	0	1972	Sep-2021	51	F	African American	MD	PRIVATE	Non-Reactive	Outpatient	Clinic
1	0	1981	Sep-2021	42	F	White	MD	PRIVATE	Non-Reactive	Outpatient	Clinic
1	0	1981	Sep-2021	42	F	White	MD	MEDICAID	Non-Reactive	Outpatient	Clinic
1	0	1967	Sep-2021	56	F	White	MD	PRIVATE	Non-Reactive	Outpatient	Clinic
1	0	1942	Sep-2021	81	F	African American	MD	MEDICARE	Non-Reactive	Outpatient	Clinic
1	0	1987	Sep-2021	36	M	African American	MD	PRIVATE	Non-Reactive	Outpatient	Clinic
1	0	1937	Sep-2021	86	F	African American	DC	MEDICARE	Non-Reactive	Outpatient	Clinic
0	1	1947	Sep-2021	76	M	White	DC	MEDICARE	Non-Reactive	Outpatient	Clinic
0	1	1949	Sep-2021	74	F	African American	MD	MEDICARE	Non-Reactive	Outpatient	Clinic
0	1	1957	Sep-2021	66	F	African American	MD	PRIVATE	Non-Reactive	Outpatient	Clinic
1	0	1981	Sep-2021	42	F	African American	DC	PRIVATE	Non-Reactive	Outpatient	Clinic
0	1	1963	Sep-2021	60	F	White	MD		Non-Reactive	Outpatient	Clinic
0	1	1954	Sep-2021	69	M	African American	DC	MEDICARE	Non-Reactive	Outpatient	Clinic
1	0	1985	Sep-2021	38	F	African American	DC	MEDICAID	Non-Reactive	Outpatient	Clinic
1	0	1943	Sep-2021	80	F	African American	DC		Non-Reactive	Outpatient	Clinic
1	0	1970	Sep-2021	53	F	African American	DC		Non-Reactive	Outpatient	Clinic
1	0	1970	Sep-2021	53	F	African American	MD	PRIVATE	Non-Reactive	Outpatient	Clinic
1	0	1967	Sep-2021	56	F	African American	DC		Non-Reactive	Outpatient	Clinic
0	1	1964	Sep-2021	59	F	African American	DC	MEDICARE	Non-Reactive	Outpatient	Clinic	1	Negative	Sep-2021	Clinic
0	1	1953	Sep-2021	70	F	African American	DC	MEDICARE	Non-Reactive	Outpatient	Clinic
1	0	1980	Sep-2021	43	F	African American	MD	PRIVATE	Non-Reactive	Outpatient	Clinic
1	0	1991	Sep-2021	32	F	African American	DC	MEDICAID	Non-Reactive	Outpatient	Clinic
1	0	1987	Sep-2021	36	F	African American	DC		Non-Reactive	Outpatient	Clinic
1	0	1979	Sep-2021	44	F	Other	DC	PRIVATE	Non-Reactive	Outpatient	Clinic
1	0	1944	Sep-2021	79	F	African American	MD	MEDICARE	Non-Reactive	Outpatient	Clinic
1	0	1970	Sep-2021	53	M	African American	MD	MEDICAID	Non-Reactive	Outpatient	Clinic
1	0	1997	Sep-2021	26	M	African American	MD	MEDICAID	Non-Reactive	Outpatient	Clinic
1	0	1973	Sep-2021	50	F	Unknown	DC	PRIVATE	Non-Reactive	Outpatient	Clinic
1	0	1972	Sep-2021	51	F	African American	DC	PRIVATE	Non-Reactive	Outpatient	Clinic
					F	African American	MD	MEDICARE	Non-Reactive		Client
0	1	1962	Sep-2021	61	M	African American	DC		Non-Reactive	Outpatient	Clinic
1	0	1990	Sep-2021	33	F	African American	DC	PRIVATE	Non-Reactive	Outpatient	Clinic
					F	White	MD	PRIVATE				1	Positive	Jul-2020	Clinic
1	0	1981	Sep-2021	42	F	African American	MD	PRIVATE	Non-Reactive	Outpatient	Clinic
1	0	1996	Sep-2021	27	F	African American	MD	PRIVATE	Non-Reactive	Outpatient	Clinic
1	0	1972	Sep-2021	51	M	White	MD	PRIVATE	Non-Reactive	Outpatient	Clinic
1	0	1970	Sep-2021	53	F	African American	DC	PRIVATE	Non-Reactive	Outpatient	Clinic
					M	White	MD					1	Negative	Jul-2020	Clinic
1	0	1976	Sep-2021	47	F	African American	VA	PRIVATE	Non-Reactive	Outpatient	Clinic
1	0	1977	Sep-2021	46	F	White	MD	PRIVATE	Non-Reactive	Outpatient	Clinic
1	0	1987	Sep-2021	36	F	Other	MD	PRIVATE	Non-Reactive	Outpatient	Clinic
0	1	1952	Sep-2021	71	F	African American	MD	MEDICARE	Non-Reactive	Outpatient	Clinic
1	0	1986	Sep-2021	37	F	White	MD	PRIVATE	Non-Reactive	Outpatient	Clinic
1	0	1997	Sep-2021	26	F	African American	DC	MEDICAID	Non-Reactive	Outpatient	Clinic
0	1	1954	Sep-2021	69	M	White	MD	PRIVATE	Non-Reactive	Outpatient	Clinic
1	0	1996	Sep-2021	27	F	African American	MD		Non-Reactive	Outpatient	Clinic
					F	African American	DC	PRIVATE				1	Negative	Jul-2020	Clinic
1	0	1973	Sep-2021	50	M	African American	MD	PRIVATE	Non-Reactive	Outpatient	Clinic
1	0	1992	Sep-2021	31	F	African American	DC	PRIVATE	Non-Reactive	Outpatient	Clinic
0	1	1956	Sep-2021	67	M	African American	MD	MEDICARE	Non-Reactive	Outpatient	Clinic
0	1	1957	Sep-2021	66	F	White	DC	PRIVATE	Non-Reactive	Outpatient	Clinic
1	0	2000	Sep-2021	23	F	African American	MD	MEDICAID	Non-Reactive	Outpatient	Clinic
1	0	1985	Sep-2021	38	F	American Indian or Alaska Native	DC	PRIVATE	Non-Reactive	Outpatient	Clinic
0	1	1948	Sep-2021	75	F	White	DC		Non-Reactive	Outpatient	Clinic
0	1	1963	Sep-2021	60	M	White	MD	PRIVATE	Reactive	Outpatient	Clinic
1	0	1988	Sep-2021	35	F	White	MD	PRIVATE	Non-Reactive	Outpatient	Clinic
0	1	1962	Sep-2021	61	M	African American	DC	PRIVATE	Non-Reactive	Outpatient	Clinic
1	0	1984	Sep-2021	39	M	White	MD	PRIVATE	Non-Reactive	Outpatient	Clinic
					F	African American	MD	MEDICARE				1	Positive	Jul-2020	Clinic
0	1	1947	Sep-2021	76	M	White	MD	MEDICARE	Non-Reactive	Outpatient	Clinic
					F	White	MD	MEDICAID				1	Negative	Jul-2020	Clinic
					F	Declined to Answer	MD	MEDICARE				1	Negative	Jul-2020	Clinic
1	0	1988	Sep-2021	35	M	African American	DC	PRIVATE	Non-Reactive	Outpatient	Clinic
1	0	1985	Sep-2021	38	M	African American	DC	PRIVATE	Non-Reactive	Outpatient	Clinic
					M	African American	DC					1	Negative	Jul-2020	Clinic
					M	African American	MD	PRIVATE				1	Negative	Jul-2020	Clinic
					M	African American	MD	MEDICAID				1	Negative	Jul-2020	Clinic
0	1	1956	Sep-2021	67	M	White	DC	MEDICAID	Non-Reactive	Outpatient	Clinic
0	1	1955	Sep-2021	68	M	White	MD	MEDICARE	Non-Reactive	Outpatient	Clinic
1	0	1978	Sep-2021	45	F	Other	MD	PRIVATE	Non-Reactive	Outpatient	Clinic
1	0	1985	Sep-2021	38	F	Other	DC	PRIVATE	Non-Reactive	Outpatient	Clinic
1	0	1993	Sep-2021	30	F	African American	MD	PRIVATE	Non-Reactive	Outpatient	Clinic
1	0	1998	Sep-2021	25	F	African American	DC	PRIVATE	Non-Reactive	Outpatient	Clinic
1	0	1941	Sep-2021	82	F	White	MD	MEDICARE	Non-Reactive	Outpatient	Clinic
1	0	1968	Sep-2021	55	M	African American	MD	MEDICAID	Non-Reactive	Outpatient	Clinic
0	1	1953	Sep-2021	70	F	White	DC	PRIVATE	Non-Reactive	Outpatient	Clinic
1	0	1970	Sep-2021	53	F	African American	MD	MEDICAID	Non-Reactive	Outpatient	Clinic
1	0	1968	Sep-2021	55	M	African American	MD	PRIVATE	Non-Reactive	Outpatient	Clinic
1	0	1980	Sep-2021	43	F	African American	MD	PRIVATE	Non-Reactive	Outpatient	Clinic
1	0	1985	Sep-2021	38	F	White	MD	PRIVATE	Non-Reactive	Outpatient	Clinic
1	0	1969	Sep-2021	54	F	White	DC	PRIVATE	Non-Reactive	Outpatient	Clinic
1	0	1984	Sep-2021	39	F	White	MD		Non-Reactive	Outpatient	Clinic
1	0	1973	Sep-2021	50	M	African American	MD	SELF PAY	Non-Reactive	Outpatient	Clinic
					M	African American	DC					1	Negative	Jul-2020	Clinic
1	0	1981	Sep-2021	42	F	African American	MD	MEDICAID	Non-Reactive	Outpatient	Clinic
1	0	1970	Sep-2021	53	F	White	MD	PRIVATE	Non-Reactive	Outpatient	Clinic
0	1	1958	Sep-2021	65	M	African American	DC	PRIVATE	Non-Reactive	Outpatient	Clinic
					F	African American	MD	MEDICARE	Non-Reactive		Outpatient Message
0	1	1954	Sep-2021	69	M	White	MD	PRIVATE	Non-Reactive	Outpatient	Clinic
0	1	1960	Sep-2021	63	F	White	MD	PRIVATE	Non-Reactive	Outpatient	Clinic
1	0	1983	Sep-2021	40	F	White	MD	PRIVATE	Non-Reactive	Outpatient	Clinic
1	0	1980	Sep-2021	43	F	White	MD	PRIVATE	Non-Reactive	Outpatient	Clinic
1	0	1995	Sep-2021	28	F	African American	DC	PRIVATE	Non-Reactive	Outpatient	Clinic
0	1	1959	Sep-2021	64	F	African American	MD	PRIVATE	Non-Reactive	Outpatient	Clinic
1	0	1997	Sep-2021	26	F	African American	MD		Non-Reactive	Outpatient	Clinic
1	0	1987	Sep-2021	36	F	African American	MD	MEDICAID	Non-Reactive	Outpatient	Clinic
1	0	1997	Sep-2021	26	M	White	MD		Non-Reactive	Outpatient	Clinic
1	0	1981	Sep-2021	42	F	White	MD	MEDICAID	Non-Reactive	Outpatient	Clinic
1	0	1979	Sep-2021	44	M	Unknown	MD	PRIVATE	Non-Reactive	Outpatient	Clinic
1	0	1978	Sep-2021	45	F	African American	MD	PRIVATE	Non-Reactive	Outpatient	Clinic
1	0	1976	Sep-2021	47	F	White	DC		Non-Reactive	Outpatient	Clinic
1	0	1994	Sep-2021	29	F	White	MD	MEDICAID	Non-Reactive	Outpatient	Clinic
					F	White	MD	MEDICARE				1	Negative	Jul-2020	Clinic
1	0	1989	Sep-2021	34	M	White	MD	PRIVATE	Non-Reactive	Outpatient	Clinic
0	1	1960	Sep-2021	63	F	White	VA	PRIVATE	Non-Reactive	Outpatient	Clinic
0	1	1948	Sep-2021	75	M	Other	MD	MEDICARE	Non-Reactive	Outpatient	Clinic
1	0	1983	Sep-2021	40	F	White	MD	PRIVATE	Non-Reactive	Outpatient	Clinic
1	0	1990	Sep-2021	33	F	African American	DC	PRIVATE	Non-Reactive	Outpatient	Clinic
					F	White	MD	MEDICAID				1	Negative	Jul-2020	Clinic
1	0	1984	Sep-2021	39	F	African American	MD	MEDICAID	Non-Reactive	Outpatient	Clinic
0	1	1951	Sep-2021	72	M	White	MD	MEDICARE	Non-Reactive	Outpatient	Clinic
0	1	1959	Sep-2021	64	F	White	MD	PRIVATE	Non-Reactive	Outpatient	Clinic
1	0	1990	Sep-2021	33	F	White	MD	PRIVATE	Non-Reactive	Outpatient	Clinic
1	0	1972	Sep-2021	51	F	African American	MD	PRIVATE	Non-Reactive	Outpatient	Clinic
1	0	1986	Sep-2021	37	F	Asian	VA	PRIVATE	Non-Reactive	Outpatient	Clinic
1	0	1992	Sep-2021	31	F	African American	MD	PRIVATE	Non-Reactive	Outpatient	Clinic
0	1	1963	Sep-2021	60	F	African American	MD	PRIVATE	Non-Reactive	Outpatient	Clinic
					F	White	MD	MEDICARE				1	Negative	Jul-2020	Clinic
1	0	1968	Sep-2021	55	M	White	DC	PRIVATE	Non-Reactive	Outpatient	Clinic
1	0	1997	Sep-2021	26	F	African American	DC	MEDICAID	Non-Reactive	Outpatient	Clinic
1	0	1988	Sep-2021	35	M	White	DC	PRIVATE	Non-Reactive	Outpatient	Clinic
1	0	1944	Sep-2021	79	F	White	MD	MEDICARE	Non-Reactive	Outpatient	Clinic
1	0	1983	Sep-2021	40	F	Unknown	MD	PRIVATE	Non-Reactive	Outpatient	Clinic
1	0	1935	Sep-2021	88	M	White	DC	MEDICARE	Non-Reactive	Outpatient	Clinic
0	1	1960	Sep-2021	63	M	White	MD	PRIVATE	Non-Reactive	Outpatient	Clinic
1	0	1977	Sep-2021	46	M	African American	MD		Non-Reactive	Outpatient	Clinic
1	0	2000	Sep-2021	23	F	White	MD	PRIVATE	Non-Reactive	Outpatient	Clinic
1	0	1965	Sep-2021	58	F	African American	MD	PRIVATE	Non-Reactive	Outpatient	Clinic
1	0	1976	Sep-2021	47	F	African American	MD		Non-Reactive	Outpatient	Clinic
1	0	1987	Sep-2021	36	F	African American	MD	PRIVATE	Non-Reactive	Outpatient	Clinic
0	1	1956	Sep-2021	67	M	African American	DC	MEDICARE	Non-Reactive	Outpatient	Clinic
1	0	1976	Sep-2021	47	F	Native Hawaiian or Pacific Islander	MD	PRIVATE	Non-Reactive	Outpatient	Clinic
1	0	2002	Sep-2021	21	F	Other	MD		Non-Reactive	Outpatient	Clinic
1	0	1989	Sep-2021	34	M	Asian	MD	PRIVATE	Non-Reactive	Outpatient	Clinic
1	0	1970	Sep-2021	53	M	White	MD	PRIVATE	Non-Reactive	Outpatient	Clinic
1	0	1969	Sep-2021	54	M	Asian	DC	PRIVATE	Non-Reactive	Outpatient	Clinic
					F	White	DC	PRIVATE				1	Negative	Jul-2020	Clinic
1	0	1995	Sep-2021	28	F	Unknown	MD	MEDICAID	Non-Reactive	Outpatient	Clinic
0	1	1963	Sep-2021	60	F	Unknown	MD		Non-Reactive	Outpatient	Clinic	1	Negative	Sep-2021	Clinic
0	1	1960	Sep-2021	63	F	Asian	VA	PRIVATE	Non-Reactive	Outpatient	Clinic
1	0	1995	Sep-2021	28	F	African American	MD	PRIVATE	Non-Reactive	Outpatient	Clinic
		1991		32	F	White	MD	MEDICAID	Non-Reactive	Outpatient	Observation
1	0	2000	Sep-2021	23	M	African American	MD		Non-Reactive	Outpatient	Clinic
1	0	1991	Sep-2021	32	F	White	DC	PRIVATE	Non-Reactive	Outpatient	Clinic
1	0	1979	Sep-2021	44	M	White	MD	Government	Non-Reactive	Outpatient	Clinic
1	0	1966	Sep-2021	57	F	White	MD	MEDICAID	Non-Reactive	Outpatient	Clinic
					F	White	DC	PRIVATE				1	Negative	Jul-2020	Clinic
1	0	1977	Sep-2021	46	M	Unknown	DC	PRIVATE	Non-Reactive	Outpatient	Clinic
1	0	1996	Sep-2021	27	M	African American	MD	PRIVATE	Non-Reactive	Outpatient	Clinic
0	1	1964	Sep-2021	59	F	Other	DC		Non-Reactive	Outpatient	Clinic
1	0	1991	Sep-2021	32	F	White	MD	PRIVATE	Non-Reactive	Outpatient	Clinic
0	1	1952	Sep-2021	71	F	White	DC		Non-Reactive	Outpatient	Clinic
1	0	1986	Sep-2021	37	F	African American	MD	PRIVATE	Non-Reactive	Outpatient	Clinic
					F	African American	DC	PRIVATE				1	Negative	Jul-2020	Clinic
1	0	1986	Sep-2021	37	M	White	MD		Non-Reactive	Outpatient	Clinic
1	0	1981	Sep-2021	42	M	Unknown	MD		Non-Reactive	Outpatient	Clinic	1	Negative	Sep-2021	Clinic
					F	African American	DC	MEDICARE				1	Negative	Jul-2020	Clinic
1	0	1965	Sep-2021	58	M	White	MD	PRIVATE	Non-Reactive	Outpatient	Clinic
1	0	1967	Sep-2021	56	M	White	MD	PRIVATE	Non-Reactive	Outpatient	Clinic
0	1	1957	Sep-2021	66	M	White	DC	SELF PAY	Non-Reactive	Outpatient	Clinic
0	1	1958	Sep-2021	65	F	White	MD	MEDICAID	Non-Reactive	Outpatient	Clinic
1	0	1987	Sep-2021	36	F	Unknown	DC	PRIVATE	Non-Reactive	Outpatient	Clinic
1	0	1986	Sep-2021	37	M	White	MD	PRIVATE	Non-Reactive	Outpatient	Clinic
1	0	1990	Sep-2021	33	M	White	DC	PRIVATE	Non-Reactive	Outpatient	Clinic
0	1	1956	Sep-2021	67	M	African American	MD	MEDICAID	Reactive	Outpatient	Clinic	1	Positive	Sep-2021	Clinic
0	1	1953	Sep-2021	70	M	White	MD	MEDICARE	Non-Reactive	Outpatient	Clinic
1	0	1995	Sep-2021	28	F	Unknown	DC	PRIVATE	Non-Reactive	Outpatient	Clinic
1	0	1996	Sep-2021	27	F	White	MD	PRIVATE	Non-Reactive	Outpatient	Clinic
1	0	1987	Sep-2021	36	F	Unknown	DC		Non-Reactive	Outpatient	Clinic
1	0	1982	Sep-2021	41	M	Unknown	MD	PRIVATE	Non-Reactive	Outpatient	Clinic
1	0	1995	Sep-2021	28	F	African American	MD	MEDICAID	Non-Reactive	Outpatient	Clinic
					F	White	MD	PRIVATE	Non-Reactive		Outpatient Message	1	Negative	Jul-2020	Outpatient Message
1	0	1991	Sep-2021	32	M	African American	DC	PRIVATE	Non-Reactive	Outpatient	Clinic
0	1	1954	Sep-2021	69	F	African American	MD	MEDICARE	Non-Reactive	Outpatient	Clinic
1	0	1985	Sep-2021	38	F	White	MD	PRIVATE	Non-Reactive	Outpatient	Clinic
1	0	1989	Sep-2021	34	M	Other	MD		Non-Reactive	Outpatient	Clinic
1	0	1993	Sep-2021	30	M	African American	DC		Non-Reactive	Outpatient	Clinic
					F	African American	DC	PRIVATE				1	Positive	Jul-2020	Clinic
1	0	1991	Sep-2021	32	F	Unknown	DC	PRIVATE	Non-Reactive	Outpatient	Clinic
0	1	1948	Sep-2021	75	F	White	MD	MEDICARE	Non-Reactive	Outpatient	Clinic
1	0	1997	Sep-2021	26	M	Unknown	MD	PRIVATE	Non-Reactive	Outpatient	Clinic
1	0	1996	Sep-2021	27	F	African American	DC	PRIVATE	Non-Reactive	Outpatient	Clinic
0	1	1954	Sep-2021	69	M	White	MD	MEDICARE	Non-Reactive	Outpatient	Clinic
1	0	1965	Sep-2021	58	F	White	VA	PRIVATE	Non-Reactive	Outpatient	Clinic
0	1	1960	Sep-2021	63	F	Other	DC		Non-Reactive	Outpatient	Clinic
1	0	1940	Sep-2021	83	F	White	IL	MEDICARE	Non-Reactive	Outpatient	Clinic
0	1	1964	Sep-2021	59	F	African American	DC	MEDICARE	Non-Reactive	Outpatient	Clinic
1	0	1990	Sep-2021	33	F	White	MD	PRIVATE	Non-Reactive	Outpatient	Clinic
					M	African American	MD	MEDICARE				1	Negative	Jul-2020	Clinic
1	0	1999	Sep-2021	24		White	MD		Non-Reactive	Outpatient	Clinic
1	0	1981	Sep-2021	42	M	White	MD	PRIVATE	Non-Reactive	Outpatient	Clinic
0	1	1958	Sep-2021	65	F	White	DC	PRIVATE	Non-Reactive	Outpatient	Clinic
0	1	1958	Sep-2021	65	M	African American	MD	MEDICARE	Non-Reactive	Outpatient	Clinic
1	0	1987	Sep-2021	36	M	African American	MD	Government	Non-Reactive	Outpatient	Clinic
1	0	1987	Sep-2021	36	M	Other	MD	PRIVATE	Non-Reactive	Outpatient	Clinic
1	0	1945	Sep-2021	78	F	African American	MD	MEDICARE	Non-Reactive	Outpatient	Clinic
1	0	1972	Sep-2021	51	F	African American	MD	PRIVATE	Non-Reactive	Outpatient	Clinic
1	0	1978	Sep-2021	45	M	White	MD	PRIVATE	Non-Reactive	Outpatient	Clinic
1	0	1984	Sep-2021	39	M	African American	MD		Non-Reactive	Outpatient	Clinic	1	Negative	Sep-2021	Clinic
1	0	1970	Sep-2021	53	F	Asian	DC		Non-Reactive	Outpatient	Clinic
1	0	1979	Sep-2021	44	F	Unknown	MD	PRIVATE	Non-Reactive	Outpatient	Clinic
1	0	1999	Sep-2021	24	F	White	VA		Non-Reactive	Outpatient	Clinic	1	Negative	Sep-2021	Clinic
1	0	1988	Sep-2021	35	F	African American	MD	MEDICAID	Non-Reactive	Outpatient	Clinic
0	1	1955	Sep-2021	68	M	African American	MD	PRIVATE	Non-Reactive	Outpatient	Clinic
0	1	1963	Sep-2021	60	F	Unknown	MD	PRIVATE	Non-Reactive	Outpatient	Clinic
					M	African American	MD					1	Negative	Jul-2020	Clinic
1	0	1991	Sep-2021	32	M	Asian	VA	PRIVATE	Non-Reactive	Outpatient	Clinic
1	0	1990	Sep-2021	33	F	Other	DC		Non-Reactive	Outpatient	Clinic
					F	White	MD	PRIVATE	Non-Reactive		Outpatient Message
1	0	1998	Sep-2021	25	F	Other	MD	PRIVATE	Non-Reactive	Outpatient	Clinic
1	0	1990	Sep-2021	33	M		MD	PRIVATE	Non-Reactive	Outpatient	Clinic
1	0	1997	Sep-2021	26	F	White	DC	PRIVATE	Non-Reactive	Outpatient	Clinic
0	1	1951	Sep-2021	72	F	African American	MD	MEDICARE	Non-Reactive	Outpatient	Clinic
1	0	1978	Sep-2021	45	M	Unknown	MD	MEDICAID	Non-Reactive	Outpatient	Clinic
1	0	1986	Sep-2021	37	M	White	VA		Non-Reactive	Outpatient	Clinic
1	0	1999	Sep-2021	24	F	White	MD	PRIVATE	Non-Reactive	Outpatient	Clinic
0	1	1964	Sep-2021	59	M	White	MD		Non-Reactive	Outpatient	Clinic	1	Negative	Sep-2021	Clinic
1	0	2004	Sep-2021	19	F	White	MD	MEDICAID	Non-Reactive	Outpatient	Clinic
1	0	1983	Sep-2021	40	F	Asian	MD		Non-Reactive	Outpatient	Clinic
1	0	1992	Sep-2021	31	F	White	MD	PRIVATE	Non-Reactive	Outpatient	Clinic
1	0	1992	Sep-2021	31	F	Unknown	DC	PRIVATE	Non-Reactive	Outpatient	Clinic
1	0	1988	Sep-2021	35	M	White	DC	PRIVATE	Non-Reactive	Outpatient	Clinic
1	0	1990	Sep-2021	33	F	White	MD	PRIVATE	Non-Reactive	Outpatient	Clinic
					F	Other	MD	PRIVATE				1	Negative	Jul-2020	Clinic
1	0	1998	Sep-2021	25	F	White	DC		Non-Reactive	Outpatient	Clinic
1	0	1976	Sep-2021	47	M	Unknown	MD		Non-Reactive	Outpatient	Clinic
1	0	1933	Sep-2021	90	M	Unknown	DC	MEDICARE	Non-Reactive	Outpatient	Clinic
1	0	1936	Sep-2021	87	F	Unknown	DC	MEDICARE	Non-Reactive	Outpatient	Clinic
0	1	1957	Sep-2021	66	M	Asian	MD	PRIVATE	Non-Reactive	Outpatient	Clinic
0	1	1964	Sep-2021	59	M	White	DC	PRIVATE	Non-Reactive	Outpatient	Clinic
0	1	1955	Sep-2021	68	M	Other	MD	MEDICARE	Non-Reactive	Outpatient	Clinic
1	0	1982	Sep-2021	41	M		MD	PRIVATE	Non-Reactive	Outpatient	Clinic
1	0	1988	Sep-2021	35	F	Unknown	DC	PRIVATE	Non-Reactive	Outpatient	Clinic
1	0	2017	Sep-2021	6	F		DC	MEDICAID	Non-Reactive	Outpatient	Clinic
1	0	1990	Sep-2021	33	M	Unknown	VA	PRIVATE	Non-Reactive	Outpatient	Clinic
1	0	1998	Sep-2021	25	F	White	MD	PRIVATE	Non-Reactive	Outpatient	Clinic
1	0	1998	Sep-2021	25	F	Other	MD	MEDICAID	Non-Reactive	Outpatient	Clinic
1	0	1998	Sep-2021	25	M	African American	MD	MEDICAID	Non-Reactive	Outpatient	Clinic
					M	African American	DC	PRIVATE				1	Negative	Jul-2020	Clinic
1	0	1976	Sep-2021	47	F	White	MD	PRIVATE	Non-Reactive	Outpatient	Clinic
1	0	1978	Sep-2021	45	F	African American	MD	MEDICAID	Non-Reactive	Outpatient	Clinic
1	0	1970	Sep-2021	53	F	African American	MD	Government	Non-Reactive	Outpatient	Clinic
1	0	1990	Sep-2021	33	F	African American	MD	MEDICAID	Non-Reactive	Outpatient	Clinic
1	0	1965	Sep-2021	58	F	White	MD	PRIVATE	Non-Reactive	Outpatient	Clinic
1	0	1980	Sep-2021	43	F	White	MD	PRIVATE	Non-Reactive	Outpatient	Clinic
1	0	1967	Sep-2021	56	M	White	MD	PRIVATE	Non-Reactive	Outpatient	Clinic
1	0	1979	Sep-2021	44	F	African American	MD	PRIVATE	Non-Reactive	Outpatient	Clinic
1	0	1984	Sep-2021	39	M	White	MD	MEDICAID	Non-Reactive	Outpatient	Clinic
0	1	1955	Sep-2021	68	F	African American	MD	PRIVATE	Non-Reactive	Outpatient	Clinic
1	0	1996	Sep-2021	27	F	African American	MD	MEDICAID	Non-Reactive	Outpatient	Clinic
1	0	1967	Sep-2021	56	M	White	VA	PRIVATE	Non-Reactive	Outpatient	Clinic
1	0	1973	Sep-2021	50	M	White	DC	PRIVATE	Non-Reactive	Outpatient	Clinic
1	0	1985	Sep-2021	38	F	African American	MD	PRIVATE	Non-Reactive	Outpatient	Clinic
1	0	1987	Sep-2021	36	F	African American	DC	MEDICAID	Non-Reactive	Outpatient	Clinic
1	0	1966	Sep-2021	57	F	White	MD	PRIVATE	Non-Reactive	Outpatient	Clinic
1	0	1941	Sep-2021	82	M	White	DC	MEDICARE	Non-Reactive	Outpatient	Clinic
0	1	1956	Sep-2021	67	F	African American	DC	MEDICARE	Non-Reactive	Outpatient	Clinic
0	1	1950	Sep-2021	73	F	African American	DC	PRIVATE	Non-Reactive	Outpatient	Clinic
0	1	1960	Sep-2021	63	F	African American	MD	PRIVATE	Non-Reactive	Outpatient	Clinic
					F	Unknown	DC	PRIVATE				1	Negative	Jul-2020	Clinic
1	0	1985	Sep-2021	38	F	African American	MD	MEDICAID	Non-Reactive	Outpatient	Clinic
0	1	1959	Sep-2021	64	F	African American	DC		Non-Reactive	Outpatient	Clinic
0	1	1963	Sep-2021	60	F	African American	MD	PRIVATE	Non-Reactive	Outpatient	Clinic
1	0	1944	Sep-2021	79	F	African American	MD	PRIVATE	Non-Reactive	Outpatient	Clinic
0	1	1962	Sep-2021	61	F	African American	MD	PRIVATE	Non-Reactive	Outpatient	Clinic
1	0	1983	Sep-2021	40	F	African American	DC	SELF PAY	Non-Reactive	Outpatient	Clinic
1	0	1971	Sep-2021	52	F	African American	MD		Non-Reactive	Outpatient	Clinic
1	0	2002	Sep-2021	21	F	Multiple	MD	MEDICAID	Non-Reactive	Outpatient	Clinic
1	0	1993	Sep-2021	30	F	African American	MD	MEDICAID	Non-Reactive	Outpatient	Clinic
1	0	2002	Sep-2021	21	F	African American	MD	MEDICAID	Non-Reactive	Outpatient	Clinic
1	0	1991	Sep-2021	32	M	African American	MD	MEDICAID	Non-Reactive	Outpatient	Clinic
					F	African American	MD	MEDICARE				1	Positive	Jul-2020	Clinic
1	0	2001	Sep-2021	22	M	African American	DC	SELF PAY	Non-Reactive	Outpatient	Clinic
1	0	1998	Sep-2021	25	M	African American	MD	PRIVATE	Non-Reactive	Outpatient	Clinic
1	0	2001	Sep-2021	22	F	African American	MD	MEDICAID	Non-Reactive	Outpatient	Clinic
					F	African American	MD					1	Negative	Jul-2020	Clinic
1	0	1989	Sep-2021	34	F	African American	DC		Non-Reactive	Outpatient	Clinic
1	0	1980	Sep-2021	43	F	White	DC	PRIVATE	Non-Reactive	Outpatient	Clinic
1	0	1990	Sep-2021	33	F	African American	DC		Non-Reactive	Outpatient	Clinic
1	0	1967	Sep-2021	56	M	African American	MD	MEDICAID	Non-Reactive	Outpatient	Clinic
1	0	1987	Sep-2021	36	F	White	MD	PRIVATE	Non-Reactive	Outpatient	Clinic
1	0	1992	Sep-2021	31	F	African American	MD	PRIVATE	Non-Reactive	Outpatient	Clinic
					M	African American	MD	PRIVATE				1	Negative	Jul-2020	Clinic
1	0	1982	Sep-2021	41	M	White	DC	MEDICARE	Non-Reactive	Outpatient	Clinic
1	0	2000	Sep-2021	23	F	African American	MD	MEDICAID	Non-Reactive	Outpatient	Clinic
1	0	1978	Sep-2021	45	F	African American	MD	PRIVATE	Non-Reactive	Outpatient	Clinic
1	0	1975	Sep-2021	48	F	African American	MD	PRIVATE	Non-Reactive	Outpatient	Clinic
1	0	1999	Sep-2021	24	F	African American	MD	MEDICAID	Non-Reactive	Outpatient	Clinic
1	0	1973	Sep-2021	50	F	White	MD	PRIVATE	Non-Reactive	Outpatient	Clinic
0	1	1949	Sep-2021	74	M	African American	MD	MEDICARE	Non-Reactive	Outpatient	Clinic
1	0	1973	Sep-2021	50	F	African American	MD	PRIVATE	Non-Reactive	Outpatient	Clinic
0	1	1952	Sep-2021	71	M	White	MD	MEDICARE	Non-Reactive	Outpatient	Clinic
1	0	1992	Sep-2021	31	F	African American	DC	MEDICAID	Non-Reactive	Outpatient	Clinic
					F	White	MD	MEDICAID				1	Positive	Jul-2020	Clinic
1	0	1966	Sep-2021	57	F	White	DC	PRIVATE	Non-Reactive	Outpatient	Clinic
					F	White	DC	PRIVATE				1	Negative	Jul-2020	Clinic
0	1	1963	Sep-2021	60	M	White	DC	MEDICAID	Non-Reactive	Outpatient	Clinic
1	0	1994	Sep-2021	29	F	White	MD	PRIVATE	Non-Reactive	Outpatient	Clinic
1	0	1965	Sep-2021	58	M	Other	VA	PRIVATE	Non-Reactive	Outpatient	Clinic
1	0	1986	Sep-2021	37	F	African American	MD	MEDICAID	Non-Reactive	Outpatient	Clinic
1	0	1984	Sep-2021	39	F	White	DC	PRIVATE	Non-Reactive	Outpatient	Clinic
1	0	1980	Sep-2021	43	F	African American	DC	MEDICAID	Non-Reactive	Outpatient	Clinic
1	0	1978	Sep-2021	45	M	African American	DC	PRIVATE	Non-Reactive	Outpatient	Clinic
0	1	1958	Sep-2021	65	F	White	DC	PRIVATE	Non-Reactive	Outpatient	Clinic
1	0	1967	Sep-2021	56	M	White	MD	PRIVATE	Non-Reactive	Outpatient	Clinic
1	0	1981	Sep-2021	42	F	White	MD	SELF PAY	Non-Reactive	Outpatient	Clinic
1	0	1967	Sep-2021	56	F	White	MD	PRIVATE	Non-Reactive	Outpatient	Clinic
1	0	1989	Sep-2021	34	F	White	DC	PRIVATE	Non-Reactive	Outpatient	Clinic
					M	African American	MD	PRIVATE				1	Negative	Jul-2020	Clinic
1	0	1970	Sep-2021	53	M	Asian	MD	MEDICAID	Non-Reactive	Outpatient	Clinic
1	0	1993	Sep-2021	30	M	African American	MD	PRIVATE	Non-Reactive	Outpatient	Clinic
1	0	1984	Sep-2021	39	F	White	MD	PRIVATE	Non-Reactive	Outpatient	Clinic
0	1	1961	Sep-2021	62	F	White	MD	PRIVATE	Reactive	Outpatient	Clinic	1	Positive	Sep-2021	Clinic
1	0	1965	Sep-2021	58	M	African American	MD	Government	Non-Reactive	Outpatient	Clinic
0	1	1957	Sep-2021	66	F	African American	MD	MEDICAID	Reactive	Outpatient	Clinic	1		Sep-2021	Clinic
1	0	1994	Sep-2021	29	F	Other	DC	MEDICAID	Non-Reactive	Outpatient	Clinic
1	0	1987	Sep-2021	36	F	White	MD	PRIVATE	Non-Reactive	Outpatient	Clinic
1	0	1940	Sep-2021	83	M	Declined to Answer	MD	MEDICARE	Non-Reactive	Outpatient	Clinic
1	0	1973	Sep-2021	50	M	African American	MD	PRIVATE	Non-Reactive	Outpatient	Clinic
1	0	1966	Sep-2021	57	F	White	MD	PRIVATE	Non-Reactive	Outpatient	Clinic
1	0	2002	Sep-2021	21	M	White	MD	MEDICAID	Non-Reactive	Outpatient	Clinic
1	0	1981	Sep-2021	42	F	African American	DC		Non-Reactive	Outpatient	Clinic
1	0	2003	Sep-2021	20	F	White	DC	PRIVATE	Non-Reactive	Outpatient	Clinic
1	0	1969	Sep-2021	54	M	White	MD	PRIVATE	Non-Reactive	Outpatient	Clinic
1	0	1973	Sep-2021	50	F	White	MD	PRIVATE	Non-Reactive	Outpatient	Clinic
0	1	1953	Sep-2021	70	F	African American	MD	PRIVATE	Non-Reactive	Outpatient	Clinic
1	0	1975	Sep-2021	48	F	Multiple	DC	PRIVATE	Non-Reactive	Outpatient	Clinic
1	0	1998	Sep-2021	25	M	White	MD		Non-Reactive	Outpatient	Clinic
1	0	1994	Sep-2021	29	M	White	MD	PRIVATE	Non-Reactive	Outpatient	Clinic
					F	Other	MD	PRIVATE				1	Negative	Jul-2020	Clinic
1	0	1972	Sep-2021	51	M	White	MD	PRIVATE	Non-Reactive	Outpatient	Clinic
1	0	1979	Sep-2021	44	F	White	MD	PRIVATE	Non-Reactive	Outpatient	Clinic
1	0	1944	Sep-2021	79	F	White	MD	MEDICARE	Non-Reactive	Outpatient	Clinic
1	0	1945	Sep-2021	78	F	White	MD	MEDICARE	Non-Reactive	Outpatient	Clinic
1	0	1989	Sep-2021	34	F	African American	MD	PRIVATE	Non-Reactive	Outpatient	Clinic
1	0	1983	Sep-2021	40	F	African American	MD	MEDICAID	Non-Reactive	Outpatient	Clinic
0	1	1947	Sep-2021	76	F	White	MD	MEDICARE	Non-Reactive	Outpatient	Clinic
					M	African American	MD	MEDICAID				1	Negative	Jul-2020	Clinic
					F	African American	DC	PRIVATE				1	Negative	Jul-2020	Clinic
1	0	1988	Sep-2021	35	M	African American	MD	MEDICAID	Non-Reactive	Outpatient	Clinic
1	0	1989	Sep-2021	34	M	African American	MD	MEDICAID	Non-Reactive	Outpatient	Clinic
1	0	1985	Sep-2021	38	F	African American	MD	PRIVATE	Non-Reactive	Outpatient	Clinic
1	0	1996	Sep-2021	27	F	Multiple	DC	PRIVATE	Non-Reactive	Outpatient	Clinic
1	0	1994	Sep-2021	29	F	White	MD	PRIVATE	Non-Reactive	Outpatient	Clinic
1	0	1967	Sep-2021	56	M	African American	MD	MEDICAID	Non-Reactive	Outpatient	Clinic
1	0	1986	Sep-2021	37	F	White	MD		Non-Reactive	Outpatient	Clinic
1	0	1980	Sep-2021	43	M	White	MD	PRIVATE	Non-Reactive	Outpatient	Clinic
1	0	1943	Sep-2021	80	F	African American	MD	MEDICARE	Indeterminate	Outpatient	Clinic
1	0	1992	Sep-2021	31	F	White	DC	PRIVATE	Non-Reactive	Outpatient	Clinic
1	0	1985	Sep-2021	38	F	African American	MN		Non-Reactive	Outpatient	Outpatient	1	Negative	Sep-2021	Outpatient
1	0	1996	Sep-2021	27	M	African American	MD	PRIVATE	Non-Reactive	Outpatient	Clinic
1	0	1990	Sep-2021	33	F	White	DC	PRIVATE	Non-Reactive	Outpatient	Clinic
1	0	1995	Sep-2021	28	F	African American	DC	MEDICAID	Non-Reactive	Outpatient	Clinic
1	0	1986	Sep-2021	37	F	African American	MD	MEDICAID	Non-Reactive	Outpatient	Clinic
1	0	1993	Sep-2021	30	F	White	MD	PRIVATE	Non-Reactive	Outpatient	Clinic
0	1	1962	Sep-2021	61	F	White	VA	PRIVATE	Non-Reactive	Outpatient	Clinic
1	0	1986	Sep-2021	37	F	Unknown	VA	PRIVATE	Non-Reactive	Outpatient	Clinic
1	0	1984	Sep-2021	39	F	White	DC	PRIVATE	Non-Reactive	Outpatient	Clinic
1	0	1988	Sep-2021	35	F	White	MD	PRIVATE	Non-Reactive	Outpatient	Clinic
1	0	1975	Sep-2021	48	F	African American	MD	PRIVATE	Non-Reactive	Outpatient	Clinic
1	0	1970	Sep-2021	53	F	White	MD	PRIVATE	Non-Reactive	Outpatient	Clinic
1	0	1999	Sep-2021	24	F	African American	MD	MEDICAID	Non-Reactive	Outpatient	Clinic
1	0	1987	Sep-2021	36	M	White	ME	PRIVATE	Non-Reactive	Outpatient	Clinic
					F	African American	MD	PRIVATE				1	Negative	Jul-2020	Clinic
1	0	1977	Sep-2021	46	F	White	MD	Government	Non-Reactive	Outpatient	Clinic
1	0	1993	Sep-2021	30	F	White	MD	PRIVATE	Non-Reactive	Outpatient	Clinic
1	0	1995	Sep-2021	28	F	White	FL	PRIVATE	Non-Reactive	Outpatient	Clinic
					F	African American	MD	MEDICAID				1	Negative	Jul-2020	Clinic
1	0	2000	Sep-2021	23	F	White	DC	PRIVATE	Non-Reactive	Outpatient	Clinic
1	0	1987	Sep-2021	36	F	White	DC	PRIVATE	Non-Reactive	Outpatient	Clinic
1	0	1981	Sep-2021	42	M	Other	MD	PRIVATE	Non-Reactive	Outpatient	Clinic
					M	African American	MD	MEDICARE				1	Positive	Jul-2020	Clinic
1	0	1965	Sep-2021	58	M	White	DC	PRIVATE	Non-Reactive	Outpatient	Clinic
1	0	1985	Sep-2021	38	M	White	MD	PRIVATE	Non-Reactive	Outpatient	Clinic
1	0	1945	Sep-2021	78	M	White	MD	MEDICARE	Non-Reactive	Outpatient	Clinic
1	0	2002	Sep-2021	21	F	African American	MD		Non-Reactive	Outpatient	Clinic
1	0	1990	Sep-2021	33	F	African American	MD	MEDICAID	Non-Reactive	Outpatient	Clinic
1	0	1992	Sep-2021	31	M	White	DC	PRIVATE	Non-Reactive	Outpatient	Clinic
1	0	1997	Sep-2021	26	M	African American	DC	PRIVATE	Non-Reactive	Outpatient	Clinic
1	0	1971	Sep-2021	52	M	Other	MD	MEDICAID	Non-Reactive	Outpatient	Clinic
					F	White	DC	PRIVATE				1	Negative	Jul-2020	Clinic
1	0	1990	Sep-2021	33	F	White	DC	PRIVATE	Non-Reactive	Outpatient	Clinic
1	0	1965	Sep-2021	58	M	White	VA	PRIVATE	Non-Reactive	Outpatient	Clinic
1	0	1966	Sep-2021	57	M	White	MD	PRIVATE	Non-Reactive	Outpatient	Clinic
					F	African American	MD	PRIVATE				1	Negative	Jul-2020	Clinic
					F	African American	DC	PRIVATE				1	Negative	Jul-2020	Clinic
1	0	1968	Sep-2021	55	F	African American	MD	MEDICAID	Non-Reactive	Outpatient	Clinic
					F	White	MD	MEDICARE				1	Negative	Jul-2020	Outpatient
1	0	1974	Sep-2021	49	M	Unknown	MD	PRIVATE	Non-Reactive	Outpatient	Clinic
1	0	1971	Sep-2021	52	F	Unknown	DC	PRIVATE	Non-Reactive	Outpatient	Clinic
1	0	2001	Sep-2021	22	F	African American	MD	MEDICAID	Non-Reactive	Outpatient	Clinic
1	0	1991	Sep-2021	32	F	Other	DC		Non-Reactive	Outpatient	Clinic
0	1	1962	Sep-2021	61	M	White	MD	PRIVATE	Non-Reactive	Outpatient	Clinic
1	0	1991	Sep-2021	32	F	American Indian or Alaska Native	MD	PRIVATE	Non-Reactive	Outpatient	Clinic
1	0	1987	Sep-2021	36	F	African American	DC	PRIVATE	Non-Reactive	Outpatient	Clinic
1	0	1998	Sep-2021	25	M	White	DC		Non-Reactive	Outpatient	Clinic
1	0	1989	Sep-2021	34	M	Other	MD	PRIVATE	Non-Reactive	Outpatient	Clinic
1	0	2001	Sep-2021	22	M	White	DC		Non-Reactive	Outpatient	Clinic
1	0	1986	Sep-2021	37	F	African American	MD	PRIVATE	Non-Reactive	Outpatient	Clinic
1	0	2002	Sep-2021	21	M		NJ		Non-Reactive	Outpatient	Clinic
1	0	1970	Sep-2021	53	F	African American	MD	PRIVATE	Non-Reactive	Outpatient	Clinic
1	0	1997	Sep-2021	26	M	Unknown	DC	SELF PAY	Non-Reactive	Outpatient	Clinic
1	0	1987	Sep-2021	36	F	Unknown			Non-Reactive	Outpatient	Outpatient
					F	African American	MD	MEDICAID				1	Negative	Jul-2020	Clinic
1	0	1998	Sep-2021	25	M	African American	DC	PRIVATE	Non-Reactive	Outpatient	Clinic
1	0	1998	Sep-2021	25		Unknown	DC	PRIVATE	Non-Reactive	Outpatient	Clinic
1	0	1992	Sep-2021	31	M	Other	DC	SELF PAY	Non-Reactive	Outpatient	Clinic
1	0	1991	Sep-2021	32	F	African American	MD	PRIVATE	Non-Reactive	Outpatient	Clinic
1	0	1983	Sep-2021	40	F	Other	MD	PRIVATE	Non-Reactive	Outpatient	Clinic
					F	African American	MD	MEDICARE				1	Negative	Jul-2020	Clinic
1	0	1990	Sep-2021	33	M	White	MD	PRIVATE	Non-Reactive	Outpatient	Clinic
1	0	1999	Sep-2021	24	F	African American	MD	MEDICAID	Non-Reactive	Outpatient	Clinic
1	0	1998	Sep-2021	25	M	White	DC	PRIVATE	Non-Reactive	Outpatient	Clinic
1	0	1998	Sep-2021	25	F	Unknown	DC	PRIVATE	Non-Reactive	Outpatient	Clinic
1	0	1998	Sep-2021	25	M	White	DC		Non-Reactive	Outpatient	Clinic
1	0	1987	Sep-2021	36	F	White	MD	PRIVATE	Non-Reactive	Outpatient	Clinic
					F	African American	MD	MEDICARE	Non-Reactive		Outpatient Message
1	0	1996	Sep-2021	27	F	White	DC	PRIVATE	Non-Reactive	Outpatient	Clinic
1	0	1982	Sep-2021	41	F	White	MD	PRIVATE	Non-Reactive	Outpatient	Clinic
1	0	1998	Sep-2021	25	M	Unknown	DC	PRIVATE	Non-Reactive	Outpatient	Clinic
					M	White	MD	MEDICARE	Non-Reactive		Outpatient Message
1	0	1999	Sep-2021	24	M	Unknown	DC		Non-Reactive	Outpatient	Clinic
1	0	1979	Sep-2021	44	M	African American	MD	PRIVATE	Non-Reactive	Outpatient	Clinic
					M	African American	MD	MEDICARE				1	Negative	Jul-2020	Clinic
1	0	1995	Sep-2021	28	M		DC	SELF PAY	Non-Reactive	Outpatient	Clinic
					M	African American	DC					1	Positive	Jul-2020	Clinic
1	0	1993	Sep-2021	30	M		DC	PRIVATE	Non-Reactive	Outpatient	Clinic
1	0	1994	Sep-2021	29	M		DC	PRIVATE	Non-Reactive	Outpatient	Clinic
1	0	1985	Sep-2021	38	F	Unknown	DC	PRIVATE	Non-Reactive	Outpatient	Clinic
1	0	2000	Sep-2021	23	F	African American	MD	MEDICAID	Non-Reactive	Outpatient	Clinic
1	0	1973	Sep-2021	50	M	White	MD	PRIVATE	Non-Reactive	Outpatient	Clinic
1	0	1991	Sep-2021	32	F	African American	DC	PRIVATE	Non-Reactive	Outpatient	Clinic	1	Negative	Sep-2021	Clinic
					F	White	MD	PRIVATE	Non-Reactive		Outpatient Message
1	0	1988	Sep-2021	35	F	African American	MD	PRIVATE	Non-Reactive	Outpatient	Clinic
1	0	1996	Sep-2021	27	M	White	DC	PRIVATE	Non-Reactive	Outpatient	Clinic
					F	White	MD	MEDICAID	Reactive		Outpatient Message	1	Positive	Jul-2020	Outpatient Message
0	1	1964	Sep-2021	59	M	Other	MD	MEDICARE	Non-Reactive	Outpatient	Clinic
1	0	1986	Sep-2021	37	M	White	DC	PRIVATE	Non-Reactive	Outpatient	Clinic
1	0	1987	Sep-2021	36	M	White	MD	PRIVATE	Non-Reactive	Outpatient	Clinic
1	0	2003	Sep-2021	20	F	Asian	MD	PRIVATE	Non-Reactive	Outpatient	Clinic
1	0	1989	Sep-2021	34	F	Unknown	DC		Non-Reactive	Outpatient	Clinic
		1962		61	M	African American	MD	MEDICAID	Non-Reactive	Outpatient	Observation
0	1	1963	Sep-2021	60	M	Unknown	MD	MEDICAID	Non-Reactive	Outpatient	Clinic
1	0	1997	Sep-2021	26	M		DC		Non-Reactive	Outpatient	Clinic
1	0	1990	Sep-2021	33	M	White	MD	MEDICAID	Non-Reactive	Outpatient	Clinic
1	0	1995	Sep-2021	28	M	Multiple	MD		Non-Reactive	Outpatient	Clinic
1	0	1986	Sep-2021	37	F	Unknown	MD		Non-Reactive	Outpatient	Clinic
0	1	1962	Sep-2021	61	F	African American	VA	PRIVATE	Non-Reactive	Outpatient	Clinic
0	1	1955	Sep-2021	68	F	Unknown	MD	MEDICARE	Non-Reactive	Outpatient	Clinic
1	0	1966	Sep-2021	57	M	White	MD	PRIVATE	Non-Reactive	Outpatient	Clinic
1	0	1974	Sep-2021	49	F	African American	DC		Non-Reactive	Outpatient	Clinic
1	0	1997	Sep-2021	26	F	African American	MD	MEDICAID	Non-Reactive	Outpatient	Clinic
1	0	1994	Sep-2021	29	F	African American	MD	MEDICAID	Non-Reactive	Outpatient	Clinic
1	0	1993	Sep-2021	30	F	White	MD	MEDICAID	Non-Reactive	Outpatient	Clinic
1	0	1974	Sep-2021	49	F	White	MD	MEDICAID	Non-Reactive	Outpatient	Clinic
1	0	1976	Sep-2021	47	F	African American	MD	PRIVATE	Non-Reactive	Outpatient	Clinic
1	0	2003	Sep-2021	20	F	African American	MD		Non-Reactive	Outpatient	Clinic
1	0	1983	Sep-2021	40	F	White	MD	MEDICAID	Non-Reactive	Outpatient	Clinic
1	0	1972	Sep-2021	51	F	White	MD	PRIVATE	Non-Reactive	Outpatient	Clinic
1	0	1973	Sep-2021	50	F	White	MD	PRIVATE	Non-Reactive	Outpatient	Clinic
0	1	1954	Sep-2021	69	M	White	MD	MEDICAID	Reactive	Outpatient	Clinic	1	Positive	Sep-2021	Clinic
0	1	1957	Sep-2021	66	F	White	MD	PRIVATE	Non-Reactive	Outpatient	Clinic
1	0	1968	Sep-2021	55	F	White	MD	PRIVATE	Non-Reactive	Outpatient	Clinic
0	1	1962	Sep-2021	61	M	White	MD	PRIVATE	Non-Reactive	Outpatient	Clinic
					M	White	MD	MEDICAID				1	Negative	Jul-2020	Clinic
1	0	1945	Sep-2021	78	F	African American	MD	MEDICARE	Non-Reactive	Outpatient	Recurring Clinic
0	1	1964	Sep-2021	59	F	White	MD	PRIVATE	Non-Reactive	Outpatient	Clinic
0	1	1964	Sep-2021	59	M	White	MD	PRIVATE	Non-Reactive	Outpatient	Clinic
0	1	1959	Sep-2021	64	M	White	MD	PRIVATE	Non-Reactive	Outpatient	Clinic
1	0	1976	Sep-2021	47	F	African American	MD	MEDICAID	Non-Reactive	Outpatient	Clinic
1	0	1978	Sep-2021	45	F	African American	MD	MEDICAID	Non-Reactive	Outpatient	Clinic
					M	White	MD	MEDICARE				1	Negative	Jul-2020	Clinic
1	0	1986	Sep-2021	37	F	White	MD	MEDICAID	Non-Reactive	Outpatient	Clinic
0	1	1959	Sep-2021	64	F	African American	MD	MEDICAID	Non-Reactive	Outpatient	Clinic
1	0	1966	Sep-2021	57	F	African American	MD	PRIVATE	Non-Reactive	Outpatient	Clinic
0	1	1964	Sep-2021	59	F	African American	MD	PRIVATE	Non-Reactive	Outpatient	Clinic
0	1	1962	Sep-2021	61	F	African American	DC	MEDICAID	Non-Reactive	Outpatient	Clinic
0	1	1960	Sep-2021	63	F	White	DC	PRIVATE	Non-Reactive	Outpatient	Clinic
1	0	1979	Sep-2021	44	M	African American	DC	PRIVATE	Non-Reactive	Outpatient	Clinic
0	1	1950	Sep-2021	73	F	African American	MD	MEDICARE	Non-Reactive	Outpatient	Clinic
0	1	1956	Sep-2021	67	F	African American	DC	PRIVATE	Non-Reactive	Outpatient	Clinic
1	0	1981	Sep-2021	42	F	African American	DC	MEDICAID	Non-Reactive	Outpatient	Clinic
1	0	1988	Sep-2021	35	F	African American	DC	MEDICAID	Non-Reactive	Outpatient	Clinic
					F	African American	MD	MEDICARE	Non-Reactive		Outpatient Message
1	0	1984	Sep-2021	39	F	African American	MD	PRIVATE	Non-Reactive	Outpatient	Clinic
1	0	1965	Sep-2021	58	M	African American			Non-Reactive	Outpatient	Outpatient
0	1	1962	Sep-2021	61	F	African American	DC		Reactive	Outpatient	Clinic	1	Negative	Sep-2021	Clinic
0	1	1955	Sep-2021	68	F	African American	MD	PRIVATE	Non-Reactive	Outpatient	Clinic
1	0	1999	Sep-2021	24	F	African American	DC		Non-Reactive	Outpatient	Clinic
0	1	1948	Sep-2021	75	M	African American	MD	MEDICARE	Non-Reactive	Outpatient	Clinic
					M	White	MD	PRIVATE				1	Negative	Jul-2020	Clinic
1	0	1984	Sep-2021	39	F	White	MD	MEDICAID	Non-Reactive	Outpatient	Clinic
0	1	1961	Sep-2021	62	M	White	MD	PRIVATE	Non-Reactive	Outpatient	Clinic
1	0	1978	Sep-2021	45	F	African American	MD	PRIVATE	Non-Reactive	Outpatient	Clinic
1	0	1998	Sep-2021	25	F	African American	MD	MEDICAID	Non-Reactive	Outpatient	Clinic
1	0	1966	Sep-2021	57	F	African American	MD	PRIVATE	Non-Reactive	Outpatient	Clinic
1	0	1988	Sep-2021	35	F	African American	DC	PRIVATE	Non-Reactive	Outpatient	Clinic
1	0	1991	Sep-2021	32	F	African American	DC	MEDICAID	Non-Reactive	Outpatient	Clinic
1	0	1983	Sep-2021	40	F	African American	DC		Non-Reactive	Outpatient	Clinic
1	0	1967	Sep-2021	56	F	African American	MD	MEDICAID	Non-Reactive	Outpatient	Clinic
					M	Asian	VA	MEDICARE				1	Negative	Jul-2020	Clinic
1	0	2001	Sep-2021	22	F	White	MD	MEDICAID	Non-Reactive	Outpatient	Clinic
1	0	1986	Sep-2021	37	F	African American	MD	MEDICAID	Non-Reactive	Outpatient	Clinic
1	0	1970	Sep-2021	53	F	White	DC		Non-Reactive	Outpatient	Clinic
1	0	1985	Sep-2021	38	F	African American	MD	MEDICAID	Non-Reactive	Outpatient	Clinic
1	0	1976	Sep-2021	47	M	White	MD	MEDICAID	Non-Reactive	Outpatient	Clinic
1	0	1970	Sep-2021	53	M	African American	MD	PRIVATE	Non-Reactive	Outpatient	Clinic
0	1	1961	Sep-2021	62	F	African American	MD	SELF PAY	Non-Reactive	Outpatient	Clinic
0	1	1957	Sep-2021	66	M	African American	DC	PRIVATE	Non-Reactive	Outpatient	Clinic
1	0	1988	Sep-2021	35	F	African American	MD	PRIVATE	Non-Reactive	Outpatient	Clinic
1	0	1987	Sep-2021	36	F	African American	MD	MEDICAID	Non-Reactive	Outpatient	Clinic
0	1	1952	Sep-2021	71	F	African American	MD	MEDICARE	Non-Reactive	Outpatient	Clinic
1	0	1975	Sep-2021	48	F	African American	MD	MEDICARE	Non-Reactive	Outpatient	Clinic
1	0	1966	Sep-2021	57	M	White	MD	PRIVATE	Non-Reactive	Outpatient	Clinic
0	1	1956	Sep-2021	67	F	African American	MD	MEDICARE	Non-Reactive	Outpatient	Clinic
1	0	1983	Sep-2021	40	F	African American	DC	PRIVATE	Non-Reactive	Outpatient	Clinic
1	0	1990	Sep-2021	33	F	White	MD	PRIVATE	Non-Reactive	Outpatient	Clinic
1	0	1965	Sep-2021	58	F	African American	DC	PRIVATE	Non-Reactive	Outpatient	Clinic
0	1	1957	Sep-2021	66	F	White	DC	PRIVATE	Non-Reactive	Outpatient	Clinic
1	0	2006	Sep-2021	17	F	White	MD	MEDICAID	Non-Reactive	Outpatient	Clinic
0	1	1964	Sep-2021	59	F	African American	MD	MEDICARE	Non-Reactive	Outpatient	Clinic
1	0	1981	Sep-2021	42	F	African American	MD	MEDICAID	Non-Reactive	Outpatient	Clinic
0	1	1958	Sep-2021	65	M	African American	MD	PRIVATE	Non-Reactive	Outpatient	Clinic
1	0	1996	Sep-2021	27	F	White	MD	PRIVATE	Non-Reactive	Outpatient	Clinic
1	0	1969	Sep-2021	54	F	African American	MD	PRIVATE	Non-Reactive	Outpatient	Clinic
1	0	1997	Sep-2021	26	F	African American	MD	MEDICAID	Non-Reactive	Outpatient	Clinic
1	0	1991	Sep-2021	32	F	African American	MD	MEDICAID	Non-Reactive	Outpatient	Clinic
1	0	1966	Sep-2021	57	M	African American	DC	PRIVATE	Non-Reactive	Outpatient	Clinic
1	0	1985	Sep-2021	38	F	White	MD	PRIVATE	Non-Reactive	Outpatient	Clinic
1	0	1982	Sep-2021	41	F	African American	MD	PRIVATE	Non-Reactive	Outpatient	Clinic
0	1	1963	Sep-2021	60	F	African American	DC		Non-Reactive	Outpatient	Clinic
1	0	1986	Sep-2021	37	M	White	DC	PRIVATE	Non-Reactive	Outpatient	Clinic
1	0	1978	Sep-2021	45	M	African American	MD	PRIVATE	Non-Reactive	Outpatient	Clinic
1	0	1967	Sep-2021	56	F	African American	MD	PRIVATE	Non-Reactive	Outpatient	Clinic
1	0	1992	Sep-2021	31	F	White	MD	PRIVATE	Non-Reactive	Outpatient	Clinic
1	0	1973	Sep-2021	50	M	African American	MD	PRIVATE	Non-Reactive	Outpatient	Clinic
					M	White	DC	PRIVATE				1	Negative	Jul-2020	Outpatient Message
					F	African American	MD	PRIVATE				1	Negative	Jul-2020	Clinic
1	0	1972	Sep-2021	51	F	African American	MD	MEDICAID	Non-Reactive	Outpatient	Clinic
1	0	1991	Sep-2021	32	F	African American	DC		Non-Reactive	Outpatient	Clinic
0	1	1959	Sep-2021	64	F	African American	MD	PRIVATE	Non-Reactive	Outpatient	Clinic	1	Negative	Sep-2021	Clinic
1	0	1972	Sep-2021	51	F	White	DC	PRIVATE	Non-Reactive	Outpatient	Clinic
1	0	1986	Sep-2021	37	F	African American	MD	PRIVATE	Non-Reactive	Outpatient	Clinic
1	0	1987	Sep-2021	36	M	White	MD	PRIVATE	Non-Reactive	Outpatient	Clinic
					F	African American	DC					1	Negative	Jul-2020	Clinic
1	0	1971	Sep-2021	52	F	Asian	MD	PRIVATE	Non-Reactive	Outpatient	Clinic
1	0	1973	Sep-2021	50	F	White	VA	PRIVATE	Non-Reactive	Outpatient	Clinic
0	1	1954	Sep-2021	69	M	White	MD	MEDICARE	Non-Reactive	Outpatient	Clinic
1	0	1993	Sep-2021	30	F	White	MD	PRIVATE	Non-Reactive	Outpatient	Clinic
1	0	1990	Sep-2021	33	M	White	MD	PRIVATE	Non-Reactive	Outpatient	Clinic
1	0	1990	Sep-2021	33	M	White	MD	PRIVATE	Non-Reactive	Outpatient	Clinic
1	0	1986	Sep-2021	37	F	White	MD	Government	Non-Reactive	Outpatient	Clinic
1	0	1971	Sep-2021	52	F	African American	MD	PRIVATE	Non-Reactive	Outpatient	Clinic
1	0	1992	Sep-2021	31	F	Unknown	MD	PRIVATE	Non-Reactive	Outpatient	Clinic
1	0	1973	Sep-2021	50	F	Asian	MD		Non-Reactive	Outpatient	Clinic
1	0	1983	Sep-2021	40	F	White	MD	PRIVATE	Non-Reactive	Outpatient	Clinic
1	0	1970	Sep-2021	53	F	African American	MD	PRIVATE	Non-Reactive	Outpatient	Clinic
0	1	1962	Sep-2021	61	M	African American	MD	PRIVATE	Non-Reactive	Outpatient	Clinic
1	0	1968	Sep-2021	55	F	African American	MD	MEDICAID	Non-Reactive	Outpatient	Clinic
1	0	1980	Sep-2021	43	M	African American	MD	PRIVATE	Non-Reactive	Outpatient	Clinic
0	1	1953	Sep-2021	70	M	White	MD	PRIVATE	Non-Reactive	Outpatient	Clinic
1	0	1990	Sep-2021	33	F	White	DC	PRIVATE	Non-Reactive	Outpatient	Clinic
1	0	1991	Sep-2021	32	F	African American	MD	MEDICAID	Non-Reactive	Outpatient	Clinic
1	0	1972	Sep-2021	51	F	African American	VA	PRIVATE	Non-Reactive	Outpatient	Clinic
1	0	1988	Sep-2021	35	F	African American	MD	MEDICAID	Non-Reactive	Outpatient	Clinic
0	1	1960	Sep-2021	63	M	White	MD	PRIVATE	Non-Reactive	Outpatient	Clinic
1	0	1942	Sep-2021	81	F	White	MD	MEDICARE	Non-Reactive	Outpatient	Clinic
1	0	1982	Sep-2021	41	F	African American	MD	PRIVATE	Non-Reactive	Outpatient	Clinic
1	0	1943	Sep-2021	80	M	White	MD		Non-Reactive	Outpatient	Clinic
1	0	1973	Sep-2021	50	M	African American	MD	MEDICAID	Non-Reactive	Outpatient	Clinic
1	0	1998	Sep-2021	25	F	African American	MD		Non-Reactive	Outpatient	Clinic
1	0	1991	Sep-2021	32	F	White	MD	MEDICAID	Non-Reactive	Outpatient	Clinic
					F	African American	MD	PRIVATE				1	Negative	Jul-2020	Clinic
0	1	1962	Sep-2021	61	F	Other	DC	PRIVATE	Non-Reactive	Outpatient	Clinic
1	0	1989	Sep-2021	34	M	African American	MD	MEDICAID	Non-Reactive	Outpatient	Clinic
0	1	1963	Sep-2021	60	F	African American	MD	PRIVATE	Non-Reactive	Outpatient	Clinic
					F	African American	MD	MEDICAID				1	Negative	Jul-2020	Clinic
1	0	1988	Sep-2021	35	F	White	MD	PRIVATE	Non-Reactive	Outpatient	Clinic
0	1	1954	Sep-2021	69	F	African American	MD	MEDICARE	Non-Reactive	Outpatient	Clinic
1	0	1997	Sep-2021	26	F	Other	MD	MEDICAID	Non-Reactive	Outpatient	Clinic
1	0	1981	Sep-2021	42	F	African American	MD	PRIVATE	Non-Reactive	Outpatient	Clinic
					M	White	VA	PRIVATE				1	Negative	Jul-2020	Clinic
1	0	1990	Sep-2021	33	F	African American	DC		Non-Reactive	Outpatient	Clinic
1	0	1994	Sep-2021	29	F	White	MD	PRIVATE	Non-Reactive	Outpatient	Clinic
1	0	1987	Sep-2021	36	F	White	MD	PRIVATE	Non-Reactive	Outpatient	Clinic
1	0	1977	Sep-2021	46	F	Asian	MD	PRIVATE	Non-Reactive	Outpatient	Clinic
1	0	1941	Sep-2021	82	F	White	MD	MEDICARE	Non-Reactive	Outpatient	Clinic
1	0	1997	Sep-2021	26	F	Asian	MD	MEDICAID	Non-Reactive	Outpatient	Clinic
0	1	1956	Sep-2021	67	F	Unknown			Non-Reactive	Outpatient	Outpatient
1	0	1989	Sep-2021	34	F	African American	MD	Government	Non-Reactive	Outpatient	Clinic
0	1	1951	Sep-2021	72	F	African American	MD	PRIVATE	Non-Reactive	Outpatient	Clinic
0	1	1963	Sep-2021	60	F	White	MD	MEDICAID	Non-Reactive	Outpatient	Clinic
1	0	1986	Sep-2021	37	M	White	MD	PRIVATE	Non-Reactive	Outpatient	Clinic
1	0	1973	Sep-2021	50	F	Multiple	MD	PRIVATE	Non-Reactive	Outpatient	Clinic
1	0	1976	Sep-2021	47	M	White	MD	PRIVATE	Non-Reactive	Outpatient	Clinic
1	0	1998	Sep-2021	25	F	White	VA	PRIVATE	Non-Reactive	Outpatient	Clinic
1	0	1974	Sep-2021	49	M	African American	MD	MEDICAID	Non-Reactive	Outpatient	Recurring Clinic
					M	African American	DC	PRIVATE				1	Positive	Jul-2020	Clinic
					M	African American	DC	PRIVATE				1	Negative	Jul-2020	Clinic
1	0	1986	Sep-2021	37	F	White	MD	PRIVATE	Non-Reactive	Outpatient	Clinic
					F	White	MD	MEDICARE				1	Negative	Jul-2020	Clinic
1	0	1995	Sep-2021	28	F	White	MD	PRIVATE	Non-Reactive	Outpatient	Clinic
1	0	1994	Sep-2021	29	M	Asian	VA	PRIVATE	Non-Reactive	Outpatient	Clinic
1	0	1987	Sep-2021	36	M	Asian	MD	PRIVATE	Non-Reactive	Outpatient	Clinic
1	0	1978	Sep-2021	45	F	Asian	MD	PRIVATE	Non-Reactive	Outpatient	Clinic
1	0	1993	Sep-2021	30	F	White	MD	MEDICAID	Non-Reactive	Outpatient	Clinic
1	0	1993	Sep-2021	30	F	Other	MD	PRIVATE	Non-Reactive	Outpatient	Clinic
1	0	1984	Sep-2021	39	F	Unknown	MD	PRIVATE	Non-Reactive	Outpatient	Clinic
1	0	1988	Sep-2021	35	M	African American	MD	MEDICAID	Non-Reactive	Outpatient	Clinic
1	0	1991	Sep-2021	32	F	African American	MD	PRIVATE	Non-Reactive	Outpatient	Clinic
1	0	1989	Sep-2021	34	F	Unknown	MD	MEDICAID	Non-Reactive	Outpatient	Clinic
1	0	1988	Sep-2021	35	F	African American	MD	MEDICAID	Non-Reactive	Outpatient	Clinic
0	1	1950	Sep-2021	73	F	African American	MD	MEDICARE	Non-Reactive	Outpatient	Clinic	1	Negative	Sep-2021	Clinic
					M	White	MD	MEDICAID				1	Positive	Jul-2020	Clinic
0	1	1954	Sep-2021	69	M	White	MD	MEDICARE	Non-Reactive	Outpatient	Clinic
					F	Other	MD	PRIVATE				1	Negative	Jul-2020	Clinic
1	0	1997	Sep-2021	26	F	White	VA		Non-Reactive	Outpatient	Clinic
1	0	1970	Sep-2021	53	M	Asian	MD	PRIVATE	Non-Reactive	Outpatient	Clinic
1	0	1990	Sep-2021	33	F	African American	MD	SELF PAY	Non-Reactive	Outpatient	Clinic
1	0	1986	Sep-2021	37	F	African American	MD	PRIVATE	Non-Reactive	Outpatient	Clinic
1	0	1969	Sep-2021	54	F	White	MD	MEDICARE	Non-Reactive	Outpatient	Clinic
1	0	1987	Sep-2021	36	M	White	DC	PRIVATE	Non-Reactive	Outpatient	Clinic
1	0	2000	Sep-2021	23	M	African American	MD	MEDICAID	Non-Reactive	Outpatient	Clinic
1	0	1988	Sep-2021	35	F	African American	MD	MEDICAID	Non-Reactive	Outpatient	Clinic
0	1	1957	Sep-2021	66	F	African American	MD	MEDICAID	Non-Reactive	Outpatient	Clinic
1	0	1984	Sep-2021	39	F	African American	MD	PRIVATE	Non-Reactive	Outpatient	Clinic
1	0	2001	Sep-2021	22	M	Unknown	DC	PRIVATE	Non-Reactive	Outpatient	Clinic
1	0	1994	Sep-2021	29	F	African American	MD	PRIVATE	Non-Reactive	Outpatient	Clinic
1	0	1979	Sep-2021	44	F	Unknown	MD		Non-Reactive	Outpatient	Clinic
1	0	1992	Sep-2021	31	F	White	MD	PRIVATE	Non-Reactive	Outpatient	Clinic
1	0	1994	Sep-2021	29	F	White	DC	PRIVATE	Non-Reactive	Outpatient	Clinic
0	1	1952	Sep-2021	71	F	White	DC	MEDICARE	Non-Reactive	Outpatient	Clinic
0	1	1963	Sep-2021	60	F	African American	MD	PRIVATE	Non-Reactive	Outpatient	Clinic
1	0	1977	Sep-2021	46	M	White	MD	PRIVATE	Non-Reactive	Outpatient	Clinic
1	0	1993	Sep-2021	30	F	Multiple	MD	PRIVATE	Non-Reactive	Outpatient	Clinic
1	0	1994	Sep-2021	29	F	White	DC	PRIVATE	Non-Reactive	Outpatient	Clinic
1	0	1994	Sep-2021	29	F	African American	MD	PRIVATE	Non-Reactive	Outpatient	Clinic
0	1	1961	Sep-2021	62	F	White	MD	PRIVATE	Non-Reactive	Outpatient	Clinic
1	0	1996	Sep-2021	27	F	White	MD	PRIVATE	Non-Reactive	Outpatient	Clinic
1	0	1971	Sep-2021	52	F	African American	MO		Non-Reactive	Outpatient	Clinic	1	Negative	Sep-2021	Clinic
1	0	1971	Sep-2021	52	M	Unknown	DC	MEDICARE	Non-Reactive	Outpatient	Clinic
0	1	1951	Sep-2021	72	M	Unknown	MD		Non-Reactive	Outpatient	Clinic	1	Negative	Sep-2021	Clinic
1	0	1990	Sep-2021	33	M	Asian	DC	PRIVATE	Non-Reactive	Outpatient	Clinic
1	0	1975	Sep-2021	48	M	Unknown	MD	PRIVATE	Non-Reactive	Outpatient	Clinic
1	0	1994	Sep-2021	29	F	African American	MD	PRIVATE	Non-Reactive	Outpatient	Clinic
1	0	2001	Sep-2021	22	F	African American	MD	PRIVATE	Non-Reactive	Outpatient	Clinic
1	0	1994	Sep-2021	29	F	White	MD		Non-Reactive	Outpatient	Clinic
					M	African American	MD	MEDICAID				1	Positive	Jul-2020	Clinic
1	0	2001	Sep-2021	22	F	Other	MD		Reactive	Outpatient	Clinic
1	0	1996	Sep-2021	27	F	White	MD	PRIVATE	Non-Reactive	Outpatient	Clinic
1	0	1996	Sep-2021	27	F	White	MD	PRIVATE	Non-Reactive	Outpatient	Clinic
1	0	1993	Sep-2021	30	M	Asian	DC		Non-Reactive	Outpatient	Clinic
1	0	1985	Sep-2021	38	F	White	MD		Non-Reactive	Outpatient	Clinic
1	0	1968	Sep-2021	55	M	Unknown	MD	MEDICAID	Non-Reactive	Outpatient	Clinic
1	0	1965	Sep-2021	58	F		MD	PRIVATE	Non-Reactive	Outpatient	Clinic
0	1	1956	Sep-2021	67	F	White	MD		Non-Reactive	Outpatient	Clinic
1	0	1991	Sep-2021	32	F	Unknown	MD	PRIVATE	Non-Reactive	Outpatient	Clinic
1	0	1993	Sep-2021	30	F	White	DC	PRIVATE	Non-Reactive	Outpatient	Clinic
1	0	1987	Sep-2021	36	F	Other	DC	PRIVATE	Non-Reactive	Outpatient	Clinic
1	0	1994	Sep-2021	29	F	White	VA	PRIVATE	Non-Reactive	Outpatient	Clinic
0	1	1961	Sep-2021	62	F	Unknown			Non-Reactive	Outpatient	Outpatient
		1969		54	M	African American	DC		Non-Reactive	Outpatient	Observation
0	1	1961	Sep-2021	62	F	White	MD	PRIVATE	Non-Reactive	Outpatient	Clinic
1	0	1970	Sep-2021	53	M	African American	VA	PRIVATE	Non-Reactive	Outpatient	Clinic
1	0	1970	Sep-2021	53	F	African American	VA	PRIVATE	Non-Reactive	Outpatient	Clinic
1	0	1994	Sep-2021	29	M	White	MD	PRIVATE	Non-Reactive	Outpatient	Clinic
1	0	2002	Sep-2021	21	M	Other	MD		Non-Reactive	Outpatient	Clinic
					F	African American	MD	PRIVATE				1	Negative	Jul-2020	Clinic
1	0	1988	Sep-2021	35	F	White	DC	PRIVATE	Non-Reactive	Outpatient	Clinic
1	0	1970	Sep-2021	53	F	Asian	VA	PRIVATE	Non-Reactive	Outpatient	Clinic
1	0	1976	Sep-2021	47	F	White	DC	PRIVATE	Non-Reactive	Outpatient	Clinic
1	0	1991	Sep-2021	32	F	Other	DC	PRIVATE	Non-Reactive	Outpatient	Clinic
1	0	1989	Sep-2021	34	F	White	MD	MEDICAID	Non-Reactive	Outpatient	Clinic
1	0	1986	Sep-2021	37	F	African American	MD	PRIVATE	Non-Reactive	Outpatient	Clinic
0	1	1952	Sep-2021	71	M	White	MD	PRIVATE	Non-Reactive	Outpatient	Clinic
0	1	1955	Sep-2021	68	M	Declined to Answer	MD	MEDICARE	Non-Reactive	Outpatient	Clinic
0	1	1960	Sep-2021	63	M	African American	VA	PRIVATE	Non-Reactive	Outpatient	Clinic
1	0	1992	Sep-2021	31	F	Asian	MD	PRIVATE	Non-Reactive	Outpatient	Clinic
0	1	1952	Sep-2021	71	M	White	MD	MEDICARE	Non-Reactive	Outpatient	Clinic
1	0	1938	Sep-2021	85	F	White	MD	MEDICARE	Non-Reactive	Outpatient	Clinic
1	0	1975	Sep-2021	48	F	African American	MD	PRIVATE	Non-Reactive	Outpatient	Clinic
1	0	1975	Sep-2021	48	F	Declined to Answer	MD	MEDICAID	Non-Reactive	Outpatient	Clinic
					F	African American	DC	PRIVATE				1	Negative	Jul-2020	Clinic
1	0	2001	Sep-2021	22	F	Asian	MD	MEDICAID	Non-Reactive	Outpatient	Clinic
0	1	1954	Sep-2021	69	F	Other	MD	PRIVATE	Non-Reactive	Outpatient	Clinic
1	0	2005	Sep-2021	18	F	White	MD	MEDICAID	Non-Reactive	Outpatient	Clinic
1	0	2006	Sep-2021	17	F	African American	MD	MEDICAID	Non-Reactive	Outpatient	Clinic
1	0	1988	Sep-2021	35	F	White	MD	MEDICAID	Non-Reactive	Outpatient	Clinic
1	0	1981	Sep-2021	42	F	White	MD	PRIVATE	Non-Reactive	Outpatient	Clinic
1	0	1991	Sep-2021	32	F	African American	MD	MEDICAID	Non-Reactive	Outpatient	Clinic
1	0	1934	Sep-2021	89	M	White	MD	MEDICARE	Non-Reactive	Outpatient	Clinic
1	0	1986	Sep-2021	37	F	African American	MD	MEDICAID	Non-Reactive	Outpatient	Clinic
1	0	1992	Sep-2021	31	F	White	MD	MEDICAID	Non-Reactive	Outpatient	Clinic
1	0	1971	Sep-2021	52	F	Other	VA	PRIVATE	Non-Reactive	Outpatient	Clinic
					F	White	MD	PRIVATE				1	Negative	Jul-2020	Clinic
1	0	1970	Sep-2021	53	F	Asian	DC	PRIVATE	Non-Reactive	Outpatient	Clinic
1	0	1942	Sep-2021	81	F	White	DC	MEDICARE	Non-Reactive	Outpatient	Clinic
1	0	1986	Sep-2021	37	F	African American	DC	PRIVATE	Non-Reactive	Outpatient	Clinic
0	1	1956	Sep-2021	67	M	African American	DC		Non-Reactive	Outpatient	Clinic
0	1	1947	Sep-2021	76	M	Other	DC	MEDICARE	Non-Reactive	Outpatient	Clinic
1	0	1978	Sep-2021	45	F	African American	DC		Non-Reactive	Outpatient	Clinic
1	0	1969	Sep-2021	54	F	African American	MD	PRIVATE	Non-Reactive	Outpatient	Clinic
0	1	1958	Sep-2021	65	F	African American	DC	PRIVATE	Non-Reactive	Outpatient	Clinic
0	1	1955	Sep-2021	68	M	African American	DC		Non-Reactive	Outpatient	Clinic
1	0	1980	Sep-2021	43	F	African American	DC	MEDICAID	Non-Reactive	Outpatient	Clinic
0	1	1955	Sep-2021	68	M	African American	DC	PRIVATE	Non-Reactive	Outpatient	Clinic
0	1	1964	Sep-2021	59	F	African American	MD	PRIVATE	Non-Reactive	Outpatient	Clinic
					F	African American	MD	COMMERCIAL				1	Negative	Jul-2020	Clinic
1	0	1974	Sep-2021	49	M	African American	MD	PRIVATE	Non-Reactive	Outpatient	Clinic
					M	White	MD	PRIVATE	Non-Reactive		Outpatient Message
1	0	1978	Sep-2021	45	F	African American	DC	PRIVATE	Non-Reactive	Outpatient	Clinic
0	1	1949	Sep-2021	74	F	African American	MD	MEDICARE	Non-Reactive	Outpatient	Clinic
1	0	1985	Sep-2021	38	F	African American	DC	MEDICAID	Non-Reactive	Outpatient	Clinic
0	1	1947	Sep-2021	76	F	African American	MD	MEDICARE	Non-Reactive	Outpatient	Clinic
1	0	1965	Sep-2021	58	M	African American	MD	MEDICAID	Non-Reactive	Outpatient	Clinic
1	0	1984	Sep-2021	39	M	White	MD	PRIVATE	Non-Reactive	Outpatient	Clinic
0	1	1954	Sep-2021	69	M	African American	DC	PRIVATE	Non-Reactive	Outpatient	Clinic
					M	African American	DC	MEDICARE				1	Negative	Jul-2020	Clinic
0	1	1961	Sep-2021	62	M	African American	DC		Non-Reactive	Outpatient	Clinic
1	0	1979	Sep-2021	44	F	African American	DC	MEDICARE	Non-Reactive	Outpatient	Clinic
0	1	1956	Sep-2021	67	F	African American	MD	MEDICARE	Reactive	Outpatient	Clinic	1	Negative	Sep-2021	Clinic
1	0	1966	Sep-2021	57	F	White	MD	PRIVATE	Non-Reactive	Outpatient	Clinic
1	0	1984	Sep-2021	39	F	Asian	DC		Non-Reactive	Outpatient	Clinic
1	0	1989	Sep-2021	34	M	African American	MD	PRIVATE	Non-Reactive	Outpatient	Clinic
					F	African American	MD	PRIVATE				1	Negative	Jul-2020	Clinic
0	1	1959	Sep-2021	64	F	African American	MD	PRIVATE	Non-Reactive	Outpatient	Clinic
1	0	1994	Sep-2021	29	F	African American	MD	PRIVATE	Non-Reactive	Outpatient	Clinic
1	0	1972	Sep-2021	51	M	White	MD	PRIVATE	Non-Reactive	Outpatient	Clinic
1	0	1980	Sep-2021	43	F	African American	MD	MEDICAID	Non-Reactive	Outpatient	Clinic
0	1	1960	Sep-2021	63	F	African American	DC	MEDICARE	Non-Reactive	Outpatient	Clinic	1	Negative	Sep-2021	Clinic
1	0	1978	Sep-2021	45	F	African American	MD	PRIVATE	Non-Reactive	Outpatient	Clinic
					F	White	DC	PRIVATE				1	Negative	Jul-2020	Clinic
1	0	1968	Sep-2021	55	M	Other	DC	PRIVATE	Non-Reactive	Outpatient	Clinic
1	0	2003	Sep-2021	20	F	White	MD	MEDICAID	Non-Reactive	Outpatient	Clinic
1	0	1969	Sep-2021	54	M	White	DC	PRIVATE	Non-Reactive	Outpatient	Clinic
1	0	1967	Sep-2021	56	F	White	MD	PRIVATE	Non-Reactive	Outpatient	Clinic
1	0	1976	Sep-2021	47	F	Unknown	MD	PRIVATE	Non-Reactive	Outpatient	Clinic
0	1	1947	Sep-2021	76	M	African American	MD	PRIVATE	Non-Reactive	Outpatient	Clinic
0	1	1958	Sep-2021	65	M	African American	DC		Non-Reactive	Outpatient	Clinic
1	0	1965	Sep-2021	58	F	American Indian or Alaska Native	MD	PRIVATE	Non-Reactive	Outpatient	Clinic
0	1	1954	Sep-2021	69	F	Other	DC	MEDICARE	Non-Reactive	Outpatient	Clinic
0	1	1946	Sep-2021	77	F	White	DC	MEDICARE	Non-Reactive	Outpatient	Clinic
1	0	1994	Sep-2021	29	M	White	MD	PRIVATE	Non-Reactive	Outpatient	Clinic
1	0	1967	Sep-2021	56	M	African American	MD	PRIVATE	Non-Reactive	Outpatient	Clinic
1	0	1992	Sep-2021	31	F	African American	MD	MEDICAID	Non-Reactive	Outpatient	Clinic
1	0	1972	Sep-2021	51	F	African American	MD	PRIVATE	Non-Reactive	Outpatient	Clinic
1	0	1967	Sep-2021	56	F	White	MD	MEDICARE	Non-Reactive	Outpatient	Clinic
1	0	1977	Sep-2021	46	F	Other	DC	MEDICAID	Non-Reactive	Outpatient	Clinic
1	0	1982	Sep-2021	41	M	African American	MD	PRIVATE	Non-Reactive	Outpatient	Clinic
1	0	1992	Sep-2021	31	F	African American	MD	PRIVATE	Non-Reactive	Outpatient	Clinic
1	0	1937	Sep-2021	86	M	White	DC	MEDICARE	Non-Reactive	Outpatient	Clinic
1	0	1970	Sep-2021	53	M	White	MD	PRIVATE	Non-Reactive	Outpatient	Clinic
1	0	1986	Sep-2021	37	F	White	DC	Government	Non-Reactive	Outpatient	Clinic
1	0	1990	Sep-2021	33	F	White	VA	PRIVATE	Non-Reactive	Outpatient	Clinic
1	0	1994	Sep-2021	29	F	African American	MD	MEDICAID	Non-Reactive	Outpatient	Clinic
1	0	1986	Sep-2021	37	F	African American	MD	PRIVATE	Non-Reactive	Outpatient	Clinic
1	0	1991	Sep-2021	32	M	African American	DC	PRIVATE	Non-Reactive	Outpatient	Clinic
0	1	1954	Sep-2021	69	M	White	MD	PRIVATE	Non-Reactive	Outpatient	Clinic
0	1	1964	Sep-2021	59	F	Declined to Answer	MD	PRIVATE	Non-Reactive	Outpatient	Clinic
0	1	1959	Sep-2021	64	M	White	DC	PRIVATE	Non-Reactive	Outpatient	Clinic
1	0	1986	Sep-2021	37	M	White	MD	PRIVATE	Non-Reactive	Outpatient	Clinic
1	0	1984	Sep-2021	39	F	White	MD	PRIVATE	Non-Reactive	Outpatient	Clinic
0	1	1959	Sep-2021	64	F	White	MD	PRIVATE	Non-Reactive	Outpatient	Clinic
1	0	1991	Sep-2021	32	F	White	MD	PRIVATE	Non-Reactive	Outpatient	Clinic
1	0	1969	Sep-2021	54	M	White	MD	MEDICAID	Non-Reactive	Outpatient	Clinic
1	0	1982	Sep-2021	41	F	White	MD	PRIVATE	Non-Reactive	Outpatient	Clinic
					F	Other	MD	MEDICARE				1	Positive	Jul-2020	Clinic
0	1	1960	Sep-2021	63	F	African American	MD	PRIVATE	Non-Reactive	Outpatient	Clinic
1	0	1969	Sep-2021	54	F	White	MD	PRIVATE	Non-Reactive	Outpatient	Clinic
					F	White	MD	PRIVATE	Non-Reactive		Outpatient Message
1	0	1944	Sep-2021	79	M	White	MD	PRIVATE	Non-Reactive	Outpatient	Clinic
1	0	1968	Sep-2021	55	F	African American	DC	PRIVATE	Non-Reactive	Outpatient	Clinic
0	1	1964	Sep-2021	59	F	African American	MD	MEDICAID	Non-Reactive	Outpatient	Clinic
1	0	1979	Sep-2021	44	F	African American	DC	PRIVATE	Non-Reactive	Outpatient	Clinic
0	1	1960	Sep-2021	63	M	White	VA		Non-Reactive	Outpatient	Clinic
1	0	1966	Sep-2021	57	M	White	MD	PRIVATE	Non-Reactive	Outpatient	Clinic
1	0	1975	Sep-2021	48	M	African American	MD	PRIVATE	Non-Reactive	Outpatient	Clinic
					M	African American	MD	PRIVATE				1	Positive	Jul-2020	Clinic
0	1	1953	Sep-2021	70	F	White	MD	MEDICARE	Non-Reactive	Outpatient	Clinic
1	0	1983	Sep-2021	40	M	White	MD	MEDICAID	Non-Reactive	Outpatient	Clinic
1	0	1980	Sep-2021	43	M	White	MD	PRIVATE	Non-Reactive	Outpatient	Clinic
1	0	1990	Sep-2021	33	F	Other	MD	PRIVATE	Non-Reactive	Outpatient	Clinic
1	0	1981	Sep-2021	42	M	White	DC	PRIVATE	Non-Reactive	Outpatient	Clinic
1	0	1997	Sep-2021	26	F	African American	DC	PRIVATE	Non-Reactive	Outpatient	Clinic
1	0	1965	Sep-2021	58	F	White	DC		Non-Reactive	Outpatient	Clinic
1	0	1975	Sep-2021	48	M	White	MD	PRIVATE	Non-Reactive	Outpatient	Clinic
1	0	1982	Sep-2021	41	F	White	DC	PRIVATE	Non-Reactive	Outpatient	Clinic
1	0	1983	Sep-2021	40	M	White	MD	MEDICAID	Non-Reactive	Outpatient	Clinic
1	0	1990	Sep-2021	33	M	White	DC	PRIVATE	Non-Reactive	Outpatient	Clinic
					F	White	VA	PRIVATE	Non-Reactive		Outpatient Message
1	0	1968	Sep-2021	55	M	White	MD	PRIVATE	Non-Reactive	Outpatient	Clinic
1	0	1999	Sep-2021	24	F	White	MD	MEDICAID	Non-Reactive	Outpatient	Clinic
1	0	1967	Sep-2021	56	M	White	MD	PRIVATE	Non-Reactive	Outpatient	Clinic
		1964		59	M	White	DC	MEDICAID	Non-Reactive	Outpatient	Observation
1	0	1991	Sep-2021	32	F	African American	MD	PRIVATE	Non-Reactive	Outpatient	Clinic
1	0	1985	Sep-2021	38	F	White	MD	PRIVATE	Non-Reactive	Outpatient	Clinic
1	0	1987	Sep-2021	36	F	African American	MD	PRIVATE	Non-Reactive	Outpatient	Outpatient
1	0	1975	Sep-2021	48	F	African American	MD	PRIVATE	Non-Reactive	Outpatient	Clinic
1	0	1988	Sep-2021	35	F	White	MD	PRIVATE	Non-Reactive	Outpatient	Clinic
1	0	1976	Sep-2021	47	M	African American	MD	PRIVATE	Non-Reactive	Outpatient	Clinic
					F	Asian	MD	PRIVATE				1	Negative	Jul-2020	Clinic
1	0	1981	Sep-2021	42	M	Other	DC	MEDICARE	Non-Reactive	Outpatient	Clinic
					F	White	MD	PRIVATE	Non-Reactive		Outpatient Message
0	1	1963	Sep-2021	60	F	African American	MD	PRIVATE	Non-Reactive	Outpatient	Clinic
1	0	1969	Sep-2021	54	M	African American	MD	MEDICAID	Non-Reactive	Outpatient	Clinic
1	0	1974	Sep-2021	49	F	Other	MD	MEDICARE	Non-Reactive	Outpatient	Clinic
0	1	1963	Sep-2021	60	F	Unknown	MD	PRIVATE	Non-Reactive	Outpatient	Clinic
1	0	1989	Sep-2021	34	F	White	MD	PRIVATE	Non-Reactive	Outpatient	Clinic
1	0	1974	Sep-2021	49	M	Other	MD	PRIVATE	Non-Reactive	Outpatient	Clinic
1	0	1972	Sep-2021	51	M	African American	MD	PRIVATE	Non-Reactive	Outpatient	Clinic
1	0	1998	Sep-2021	25	F	African American	MD	MEDICAID	Non-Reactive	Outpatient	Clinic
1	0	1988	Sep-2021	35	F	Other	DC	PRIVATE	Non-Reactive	Outpatient	Clinic
1	0	1997	Sep-2021	26	F	Multiple	MD	MEDICAID	Non-Reactive	Outpatient	Clinic
1	0	1979	Sep-2021	44	F	White	MD	PRIVATE	Non-Reactive	Outpatient	Clinic
1	0	1989	Sep-2021	34	F	White	DC	PRIVATE	Non-Reactive	Outpatient	Clinic
0	1	1960	Sep-2021	63	F	Declined to Answer	MD	PRIVATE	Non-Reactive	Outpatient	Clinic
1	0	1997	Sep-2021	26	F	African American	DC	PRIVATE	Non-Reactive	Outpatient	Clinic
					M	African American	DC	PRIVATE				1	Negative	Jul-2020	Clinic
1	0	1997	Sep-2021	26	F	Unknown	MD	MEDICAID	Non-Reactive	Outpatient	Clinic
1	0	1979	Sep-2021	44	F	African American	MD	MEDICAID	Non-Reactive	Outpatient	Clinic
1	0	1978	Sep-2021	45	M	White	MD	PRIVATE	Non-Reactive	Outpatient	Clinic
1	0	1988	Sep-2021	35	F		DC	PRIVATE	Non-Reactive	Outpatient	Clinic
1	0	1984	Sep-2021	39	F	White	MD	PRIVATE	Non-Reactive	Outpatient	Clinic
0	1	1947	Sep-2021	76	F	White	DC	PRIVATE	Non-Reactive	Outpatient	Clinic
1	0	1971	Sep-2021	52	F	Asian	MD		Non-Reactive	Outpatient	Clinic
0	1	1956	Sep-2021	67	M	White	MD	PRIVATE	Non-Reactive	Outpatient	Clinic
					M	Asian	MD	PRIVATE				1	Negative	Jul-2020	Clinic
1	0	1978	Sep-2021	45	M	White	MD	PRIVATE	Non-Reactive	Outpatient	Clinic
1	0	1970	Sep-2021	53	F	Unknown			Non-Reactive	Outpatient	Outpatient
1	0	1999	Sep-2021	24	F	African American	MD	MEDICAID	Non-Reactive	Outpatient	Clinic
1	0	1987	Sep-2021	36	F	White	MD	PRIVATE	Non-Reactive	Outpatient	Clinic
0	1	1957	Sep-2021	66	M	White	MD	PRIVATE	Non-Reactive	Outpatient	Clinic
0	1	1952	Sep-2021	71	M	White	MD	PRIVATE	Non-Reactive	Outpatient	Clinic
1	0	2003	Sep-2021	20	F	Other	DC	MEDICAID	Non-Reactive	Outpatient	Clinic
1	0	1978	Sep-2021	45	F	African American	MD	PRIVATE	Non-Reactive	Outpatient	Clinic
0	1	1946	Sep-2021	77	F	White	MD	MEDICARE	Non-Reactive	Outpatient	Clinic
1	0	1992	Sep-2021	31	F	White	MD	SELF PAY	Non-Reactive	Outpatient	Clinic
1	0	1992	Sep-2021	31	F	Other	MD	MEDICAID	Non-Reactive	Outpatient	Clinic
					F	African American	MD					1	Negative	Jul-2020	Clinic
1	0	1992	Sep-2021	31	F	White	DC	PRIVATE	Non-Reactive	Outpatient	Clinic
0	1	1946	Sep-2021	77	F	White	DC	MEDICARE	Non-Reactive	Outpatient	Clinic
0	1	1963	Sep-2021	60	F	Unknown			Non-Reactive	Outpatient	Outpatient
0	1	1954	Sep-2021	69	F	Unknown			Non-Reactive	Outpatient	Outpatient
0	1	1964	Sep-2021	59	F	White	MD		Non-Reactive	Outpatient	Clinic
1	0	1999	Sep-2021	24	F	African American	DC		Non-Reactive	Outpatient	Clinic
					F	White	DC	PRIVATE				1	Negative	Jul-2020	Clinic
					F	White	MD	MEDICAID				1	Positive	Jul-2020	Clinic
1	0	1992	Sep-2021	31	M	Other	VA		Non-Reactive	Outpatient	Clinic	1	Negative	Sep-2021	Clinic
1	0	1973	Sep-2021	50	F	Asian	MD	PRIVATE	Non-Reactive	Outpatient	Clinic
1	0	1987	Sep-2021	36	F	Asian	DC	PRIVATE	Non-Reactive	Outpatient	Clinic
1	0	1996	Sep-2021	27	F	White	MD		Non-Reactive	Outpatient	Clinic
0	1	1953	Sep-2021	70	M	African American	DC	MEDICARE	Reactive	Outpatient	Clinic	1	Positive	Sep-2021	Clinic
1	0	1967	Sep-2021	56	M	White	DC	PRIVATE	Non-Reactive	Outpatient	Clinic
1	0	1987	Sep-2021	36	F	White	MD	PRIVATE	Non-Reactive	Outpatient	Clinic
1	0	1944	Sep-2021	79	F	African American	MD	MEDICARE	Non-Reactive	Outpatient	Clinic
1	0	1973	Sep-2021	50	F	African American	MD	PRIVATE	Non-Reactive	Outpatient	Clinic
1	0	1999	Sep-2021	24	F	White	MD	PRIVATE	Non-Reactive	Outpatient	Clinic
0	1	1962	Sep-2021	61	F	White	MD	PRIVATE	Non-Reactive	Outpatient	Clinic
					F	African American	MD	PRIVATE				1	Negative	Jul-2020	Clinic
					F	African American	MD	PRIVATE				1	Negative	Jul-2020	Clinic
1	0	1994	Sep-2021	29	F	White	MD	PRIVATE	Non-Reactive	Outpatient	Clinic
1	0	1989	Sep-2021	34	F	White	MD		Non-Reactive	Outpatient	Clinic
1	0	1994	Sep-2021	29	M	Asian	VA	PRIVATE	Non-Reactive	Outpatient	Clinic
1	0	1975	Sep-2021	48	F	White	MD		Non-Reactive	Outpatient	Clinic
1	0	1972	Sep-2021	51	M	White	MD		Non-Reactive	Outpatient	Clinic	1	Negative	Sep-2021	Clinic
1	0	2001	Sep-2021	22	M	White	DC		Non-Reactive	Outpatient	Clinic
1	0	2002	Sep-2021	21	M	African American	MD		Non-Reactive	Outpatient	Clinic
0	1	1954	Sep-2021	69	F	White	MD	PRIVATE	Non-Reactive	Outpatient	Clinic
1	0	1987	Sep-2021	36	F	White	DC	PRIVATE	Non-Reactive	Outpatient	Clinic
1	0	1999	Sep-2021	24	F	White	DC		Non-Reactive	Outpatient	Clinic
1	0	1993	Sep-2021	30	M	African American	DC	PRIVATE	Non-Reactive	Outpatient	Clinic
0	1	1949	Sep-2021	74	M	White	MD	MEDICARE	Non-Reactive	Outpatient	Clinic
0	1	1964	Sep-2021	59	F	Asian	MD		Non-Reactive	Outpatient	Clinic
					F	White	MD	MEDICAID	Non-Reactive		Outpatient Message
					M	African American	MD	MEDICAID				1	Negative	Jul-2020	Clinic
1	0	1976	Sep-2021	47	M	Unknown	MD	PRIVATE	Non-Reactive	Outpatient	Clinic
1	0	1987	Sep-2021	36	F	White	MD	PRIVATE	Non-Reactive	Outpatient	Clinic
1	0	1980	Sep-2021	43	M	Other	MD	PRIVATE	Non-Reactive	Outpatient	Clinic
0	1	1960	Sep-2021	63	F	African American	DC		Non-Reactive	Outpatient	Clinic
0	1	1958	Sep-2021	65	M	White	MD	PRIVATE	Non-Reactive	Outpatient	Clinic
1	0	1990	Sep-2021	33	F		DC	PRIVATE	Non-Reactive	Outpatient	Clinic
0	1	1960	Sep-2021	63	F	Other	MD	SELF PAY	Non-Reactive	Outpatient	Clinic
					M	African American	DC	MEDICAID				1		Jul-2020	Clinic
1	0	1995	Sep-2021	28	M	African American	DC	PRIVATE	Non-Reactive	Outpatient	Clinic
1	0	1982	Sep-2021	41	M	Other	DC	PRIVATE	Non-Reactive	Outpatient	Clinic
1	0	1996	Sep-2021	27	F	Unknown	DC	PRIVATE	Non-Reactive	Outpatient	Clinic
1	0	2001	Sep-2021	22	F	White	DC	PRIVATE	Non-Reactive	Outpatient	Clinic
1	0	1999	Sep-2021	24	F	White	MD	SELF PAY	Non-Reactive	Outpatient	Clinic
1	0	1980	Sep-2021	43	M	White	MD	PRIVATE	Non-Reactive	Outpatient	Clinic
1	0	1997	Sep-2021	26	F	White	DC		Non-Reactive	Outpatient	Clinic
1	0	1942	Sep-2021	81	M	Unknown	DC	MEDICARE	Non-Reactive	Outpatient	Clinic
1	0	2002	Sep-2021	21	F	Multiple	DC	PRIVATE	Non-Reactive	Outpatient	Clinic
1	0	1996	Sep-2021	27	F	White	DC	PRIVATE	Non-Reactive	Outpatient	Clinic
1	0	1983	Sep-2021	40	M	White	MD	PRIVATE	Non-Reactive	Outpatient	Clinic
1	0	1985	Sep-2021	38	F	Other	MD		Non-Reactive	Outpatient	Clinic
					M	White	MD	PRIVATE				1	Negative	Jul-2020	Clinic
1	0	1999	Sep-2021	24	F	White	DC		Non-Reactive	Outpatient	Clinic
1	0	1983	Sep-2021	40	F	White	MD		Non-Reactive	Outpatient	Clinic
1	0	2000	Sep-2021	23	F	Declined to Answer	MD	Government	Non-Reactive	Outpatient	Clinic
1	0	1999	Sep-2021	24	F	White	MD	PRIVATE	Non-Reactive	Outpatient	Clinic
1	0	1996	Sep-2021	27	M	Unknown	MD	PRIVATE	Non-Reactive	Outpatient	Clinic
1	0	2000	Sep-2021	23	F	Unknown	MD	PRIVATE	Non-Reactive	Outpatient	Clinic
1	0	1993	Sep-2021	30	F	Asian	DC	PRIVATE	Non-Reactive	Outpatient	Clinic
1	0	1990	Sep-2021	33	M	White	MD	PRIVATE	Non-Reactive	Outpatient	Clinic
1	0	1986	Sep-2021	37	F	African American	MD	PRIVATE	Non-Reactive	Outpatient	Clinic
1	0	1994	Sep-2021	29	F	Unknown	MD	PRIVATE	Non-Reactive	Outpatient	Clinic
1	0	1985	Sep-2021	38	M	Other	MD	PRIVATE	Non-Reactive	Outpatient	Clinic
1	0	1980	Sep-2021	43	M	White	MD	PRIVATE	Non-Reactive	Outpatient	Clinic
1	0	1998	Sep-2021	25	F	Asian	MD	PRIVATE	Non-Reactive	Outpatient	Clinic
					M	African American	MD	MEDICARE				1	Negative	Jul-2020	Clinic
1	0	1997	Sep-2021	26	M	White	MD	MEDICAID	Non-Reactive	Outpatient	Clinic
1	0	1991	Sep-2021	32	F	Asian	DC	PRIVATE	Non-Reactive	Outpatient	Clinic
1	0	1984	Sep-2021	39	F	African American	DC	PRIVATE	Non-Reactive	Outpatient	Clinic
1	0	1999	Sep-2021	24	F	White	MD	PRIVATE	Non-Reactive	Outpatient	Clinic
1	0	1993	Sep-2021	30	F	African American	MD		Non-Reactive	Outpatient	Clinic
1	0	1992	Sep-2021	31	F		MD	MEDICAID	Non-Reactive	Outpatient	Clinic
1	0	1979	Sep-2021	44	F		MD	PRIVATE	Non-Reactive	Outpatient	Clinic
0	1	1964	Sep-2021	59	M	African American	DC	PRIVATE	Non-Reactive	Outpatient	Clinic
1	0	1981	Sep-2021	42	F	White	MD	MEDICAID	Non-Reactive	Outpatient	Clinic
1	0	1969	Sep-2021	54	F	White	MD	MEDICAID	Non-Reactive	Outpatient	Clinic
0	1	1957	Sep-2021	66	F	White	MD	MEDICAID	Reactive	Outpatient	Clinic	1	Negative	Sep-2021	Clinic
1	0	1976	Sep-2021	47	F	White	MD	MEDICAID	Non-Reactive	Outpatient	Clinic
1	0	1979	Sep-2021	44	F	White	MD	MEDICAID	Non-Reactive	Outpatient	Clinic
0	1	1947	Sep-2021	76	F	White	MD	MEDICARE	Non-Reactive	Outpatient	Clinic
1	0	1981	Sep-2021	42	F	White	MD	PRIVATE	Non-Reactive	Outpatient	Clinic
0	1	1963	Sep-2021	60	F	Other	MD	PRIVATE	Non-Reactive	Outpatient	Clinic
					M	African American	MD	MEDICARE				1	Negative	Jul-2020	Clinic
					F	African American	MD	SELF PAY	Non-Reactive		Outpatient Message
1	0	1989	Sep-2021	34	F	African American	MD	MEDICAID	Non-Reactive	Outpatient	Clinic
1	0	1965	Sep-2021	58	F	African American	MD	PRIVATE	Non-Reactive	Outpatient	Clinic
1	0	2003	Sep-2021	20	F	White	MD	MEDICAID	Non-Reactive	Outpatient	Clinic
0	1	1958	Sep-2021	65	F	African American	MD	PRIVATE	Non-Reactive	Outpatient	Clinic
					F	Asian	DC					1	Negative	Jul-2020	Clinic
					M	African American	MD	MEDICARE				1	Positive	Jul-2020	Clinic
0	1	1958	Sep-2021	65	F	African American	MD	MEDICAID	Non-Reactive	Outpatient	Clinic
1	0	1981	Sep-2021	42	F	Other	MD	MEDICAID	Non-Reactive	Outpatient	Clinic
1	0	1975	Sep-2021	48	F	African American	MD	PRIVATE	Non-Reactive	Outpatient	Clinic
1	0	1974	Sep-2021	49	F	African American	MD	PRIVATE	Non-Reactive	Outpatient	Clinic
0	1	1964	Sep-2021	59	F	African American	MD	PRIVATE	Non-Reactive	Outpatient	Clinic
1	0	1970	Sep-2021	53	F	White	MD	PRIVATE	Non-Reactive	Outpatient	Clinic
0	1	1955	Sep-2021	68	F	White	MD	MEDICARE	Non-Reactive	Outpatient	Clinic
1	0	1969	Sep-2021	54	F	White	VA	PRIVATE	Non-Reactive	Outpatient	Clinic
					M	White	MD	MEDICAID				1	Positive	Jul-2020	Clinic
0	1	1957	Sep-2021	66	F	White	VA		Non-Reactive	Outpatient	Clinic	1	Negative	Sep-2021	Clinic
1	0	1974	Sep-2021	49	F	White	VA	PRIVATE	Non-Reactive	Outpatient	Clinic
0	1	1958	Sep-2021	65	F	White	MD	PRIVATE	Non-Reactive	Outpatient	Clinic
1	0	1997	Sep-2021	26	F	African American	DC	PRIVATE	Non-Reactive	Outpatient	Clinic
1	0	1980	Sep-2021	43	F	White	DC	PRIVATE	Non-Reactive	Outpatient	Clinic
1	0	1967	Sep-2021	56	F	African American	DC	PRIVATE	Non-Reactive	Outpatient	Clinic
1	0	1978	Sep-2021	45	F	African American	DC	MEDICAID	Non-Reactive	Outpatient	Clinic
1	0	1983	Sep-2021	40	F	African American	DC		Non-Reactive	Outpatient	Clinic
					F	Asian	DC	PRIVATE				1	Negative	Jul-2020	Clinic
					M	African American	DC	PRIVATE				1	Negative	Jul-2020	Clinic
0	1	1950	Sep-2021	73	F	African American	DC	MEDICARE	Non-Reactive	Outpatient	Clinic
0	1	1955	Sep-2021	68	M	African American	VA		Reactive	Outpatient	Clinic	1	Negative	Sep-2021	Clinic
					F	African American	MD	PRIVATE				1	Negative	Jul-2020	Clinic
1	0	1988	Sep-2021	35	F	African American	DC		Non-Reactive	Outpatient	Clinic
0	1	1960	Sep-2021	63	F	American Indian or Alaska Native	DC		Non-Reactive	Outpatient	Clinic
1	0	1989	Sep-2021	34	F	African American	DC		Non-Reactive	Outpatient	Clinic
0	1	1963	Sep-2021	60	M	African American	MD	PRIVATE	Non-Reactive	Outpatient	Clinic
1	0	1966	Sep-2021	57	F	African American	MD	PRIVATE	Non-Reactive	Outpatient	Clinic
1	0	1976	Sep-2021	47	F	African American	DC	PRIVATE	Non-Reactive	Outpatient	Clinic
1	0	1985	Sep-2021	38	F	African American	MD	MEDICAID	Non-Reactive	Outpatient	Clinic
					F	African American	MD	MEDICAID				1	Negative	Jul-2020	Clinic
0	1	1957	Sep-2021	66	M	African American	DC	PRIVATE	Non-Reactive	Outpatient	Clinic
0	1	1961	Sep-2021	62	F	African American	MD	MEDICARE	Non-Reactive	Outpatient	Clinic
1	0	1984	Sep-2021	39	F	African American	DC		Non-Reactive	Outpatient	Clinic
0	1	1946	Sep-2021	77	F	African American	MD	MEDICARE	Non-Reactive	Outpatient	Clinic
1	0	1989	Sep-2021	34	F	African American	DC	PRIVATE	Non-Reactive	Outpatient	Clinic
1	0	1983	Sep-2021	40	M	White	MD	PRIVATE	Non-Reactive	Outpatient	Clinic
1	0	1974	Sep-2021	49	F	White	MD	PRIVATE	Non-Reactive	Outpatient	Clinic
1	0	1984	Sep-2021	39	M	African American	MD	MEDICAID	Non-Reactive	Outpatient	Clinic
					F	African American	DC	PRIVATE				1	Negative	Jul-2020	Clinic
0	1	1949	Sep-2021	74	M	White	MD	PRIVATE	Non-Reactive	Outpatient	Clinic
					F	White	MD	SELF PAY	Non-Reactive	Preadmit	Outpatient
					F	White	MD	PRIVATE				1	Negative	Jul-2020	Clinic
1	0	1992	Sep-2021	31	F	African American	MD	MEDICAID	Non-Reactive	Outpatient	Clinic
0	1	1954	Sep-2021	69	F	African American	DC	MEDICARE	Non-Reactive	Outpatient	Clinic
0	1	1956	Sep-2021	67	F	African American	MD	PRIVATE	Non-Reactive	Outpatient	Clinic
1	0	1990	Sep-2021	33	F	African American	DC		Non-Reactive	Outpatient	Clinic
1	0	1987	Sep-2021	36	F	Other	DC	PRIVATE	Non-Reactive	Outpatient	Clinic
0	1	1959	Sep-2021	64	M	White	MD	PRIVATE	Non-Reactive	Outpatient	Clinic
1	0	1997	Sep-2021	26	F	African American	DC	MEDICAID	Non-Reactive	Outpatient	Clinic
1	0	2005	Sep-2021	18	F	African American	MD	MEDICAID	Non-Reactive	Outpatient	Clinic
1	0	1979	Sep-2021	44	M	African American	MD	MEDICAID	Non-Reactive	Outpatient	Clinic
1	0	1982	Sep-2021	41	F	White	MD	PRIVATE	Non-Reactive	Outpatient	Clinic
1	0	1991	Sep-2021	32	F	African American	DC	PRIVATE	Non-Reactive	Outpatient	Clinic
1	0	1992	Sep-2021	31	F	African American	MD	MEDICAID	Non-Reactive	Outpatient	Clinic
1	0	1969	Sep-2021	54	M	African American	MD	MEDICAID	Non-Reactive	Outpatient	Clinic
1	0	1983	Sep-2021	40	M	Other	MD	MEDICARE	Non-Reactive	Outpatient	Clinic
1	0	1978	Sep-2021	45	F	Other	DC		Non-Reactive	Outpatient	Clinic
1	0	1975	Sep-2021	48	F	White	MD	PRIVATE	Non-Reactive	Outpatient	Clinic
1	0	1979	Sep-2021	44	F	White	MD		Non-Reactive	Outpatient	Clinic
0	1	1957	Sep-2021	66	F	White	MD	PRIVATE	Non-Reactive	Outpatient	Clinic
1	0	1980	Sep-2021	43	F	Unknown	MD	PRIVATE	Non-Reactive	Outpatient	Outpatient
1	0	1979	Sep-2021	44	M	African American	DC	PRIVATE	Non-Reactive	Outpatient	Clinic
0	1	1952	Sep-2021	71	M	White	DC	PRIVATE	Non-Reactive	Outpatient	Clinic
1	0	1989	Sep-2021	34	F	African American	DC	PRIVATE	Non-Reactive	Outpatient	Clinic
1	0	1968	Sep-2021	55	F	White	DC	PRIVATE	Non-Reactive	Outpatient	Clinic
0	1	1947	Sep-2021	76	F	African American	MD	MEDICARE	Non-Reactive	Outpatient	Clinic
1	0	1973	Sep-2021	50	M	Other	MD	PRIVATE	Non-Reactive	Outpatient	Clinic
1	0	1943	Sep-2021	80	F	African American	MD	MEDICARE	Non-Reactive	Outpatient	Clinic
1	0	1987	Sep-2021	36	F	White	MD	MEDICAID	Non-Reactive	Outpatient	Clinic
0	1	1949	Sep-2021	74	F	African American	MD	PRIVATE		Outpatient	Clinic	1	Positive	Sep-2021	Clinic
1	0	1998	Sep-2021	25	F	African American	MD	MEDICAID	Non-Reactive	Outpatient	Clinic
1	0	1995	Sep-2021	28	M	African American	MD	PRIVATE	Non-Reactive	Outpatient	Outpatient
1	0	1968	Sep-2021	55	F	White	DC	PRIVATE	Non-Reactive	Outpatient	Clinic
1	0	1966	Sep-2021	57	F	White	VA	PRIVATE	Non-Reactive	Outpatient	Clinic
1	0	1985	Sep-2021	38	M	White	MD	PRIVATE	Non-Reactive	Outpatient	Clinic
1	0	2002	Sep-2021	21	F	African American	MD		Non-Reactive	Outpatient	Clinic
					F	African American	DC					1	Negative	Jul-2020	Clinic
0	1	1958	Sep-2021	65	M	White	MD	PRIVATE	Non-Reactive	Outpatient	Clinic
1	0	1965	Sep-2021	58	M	African American	DC		Non-Reactive	Outpatient	Clinic
1	0	1988	Sep-2021	35	F	African American	MD	PRIVATE	Non-Reactive	Outpatient	Clinic
0	1	1963	Sep-2021	60	M	White	MD	MEDICAID	Non-Reactive	Outpatient	Clinic
1	0	1994	Sep-2021	29	F	African American	DC		Non-Reactive	Outpatient	Clinic
1	0	1977	Sep-2021	46	M	African American	DC	PRIVATE	Non-Reactive	Outpatient	Clinic
1	0	1970	Sep-2021	53	F	White	MD	MEDICARE	Non-Reactive	Outpatient	Clinic
1	0	1969	Sep-2021	54	M	African American	MD	PRIVATE	Non-Reactive	Outpatient	Clinic
0	1	1956	Sep-2021	67	F	White	MD	PRIVATE	Non-Reactive	Outpatient	Clinic
1	0	1996	Sep-2021	27	F	Other	VA	PRIVATE	Non-Reactive	Outpatient	Clinic
1	0	1981	Sep-2021	42	M	White	MD	PRIVATE	Non-Reactive	Outpatient	Clinic
1	0	1973	Sep-2021	50	M	African American	MD	PRIVATE	Non-Reactive	Outpatient	Clinic
1	0	1974	Sep-2021	49	F	Asian	VA	PRIVATE	Non-Reactive	Outpatient	Clinic
1	0	1965	Sep-2021	58	M	White	MD	PRIVATE	Non-Reactive	Outpatient	Clinic
0	1	1947	Sep-2021	76	F	White	DC	MEDICARE	Non-Reactive	Outpatient	Clinic
1	0	1992	Sep-2021	31	F	African American	MD	PRIVATE	Non-Reactive	Outpatient	Clinic
1	0	1972	Sep-2021	51	M	White	MD	PRIVATE	Non-Reactive	Outpatient	Clinic
1	0	1984	Sep-2021	39	F	African American	DC	PRIVATE	Non-Reactive	Outpatient	Clinic
1	0	1982	Sep-2021	41	F	White	MD	PRIVATE	Non-Reactive	Outpatient	Clinic
1	0	1970	Sep-2021	53	F	White	MD	PRIVATE	Non-Reactive	Outpatient	Clinic
0	1	1950	Sep-2021	73	M	White	DC	MEDICARE	Non-Reactive	Outpatient	Clinic
1	0	1988	Sep-2021	35	M	African American	DC	PRIVATE	Non-Reactive	Outpatient	Clinic
1	0	1943	Sep-2021	80	F	White	MD	MEDICARE	Non-Reactive	Outpatient	Clinic
1	0	1988	Sep-2021	35	F	White	DC	PRIVATE	Non-Reactive	Outpatient	Clinic
1	0	1944	Sep-2021	79	F	White	MD	MEDICARE	Non-Reactive	Outpatient	Clinic
1	0	1991	Sep-2021	32	F	African American	MD	MEDICAID	Non-Reactive	Outpatient	Clinic
1	0	1992	Sep-2021	31	F	African American	DC	MEDICAID	Non-Reactive	Outpatient	Clinic
1	0	1991	Sep-2021	32	F	Other	MD	PRIVATE	Non-Reactive	Outpatient	Clinic
					F	White	DC	PRIVATE				1	Negative	Jul-2020	Clinic
1	0	1981	Sep-2021	42	F	White	MD		Non-Reactive	Outpatient	Clinic
					M	White	DC	PRIVATE				1	Negative	Jul-2020	Clinic
1	0	1987	Sep-2021	36	M	Unknown	MD	PRIVATE	Non-Reactive	Outpatient	Clinic
1	0	1995	Sep-2021	28	F	Asian	MD	PRIVATE	Non-Reactive	Outpatient	Clinic
1	0	1988	Sep-2021	35	F	White	DC	PRIVATE	Non-Reactive	Outpatient	Clinic
1	0	1986	Sep-2021	37	F	Other	MD	MEDICAID	Non-Reactive	Outpatient	Clinic
1	0	1974	Sep-2021	49	F	Unknown	MD	PRIVATE	Non-Reactive	Outpatient	Clinic
					F	African American	DC	MEDICAID				1	Negative	Jul-2020	Clinic
1	0	1997	Sep-2021	26	M	African American	MD		Non-Reactive	Outpatient	Clinic
1	0	1997	Sep-2021	26	F	Other	MD	MEDICAID	Non-Reactive	Outpatient	Clinic
1	0	1990	Sep-2021	33	F	Asian	MD		Non-Reactive	Outpatient	Clinic
1	0	1970	Sep-2021	53	F	African American	MD	PRIVATE	Non-Reactive	Outpatient	Clinic
1	0	1974	Sep-2021	49	F	Other	DC	PRIVATE	Non-Reactive	Outpatient	Clinic
[truncated: 167,157 more rows]
